# Supplementary material for: Multitargeting Histamine H3 Receptor Ligands among Acetyl- and Propionyl-Phenoxyalkyl Derivatives
Source: MDPI journal article supplement (doi:10.3390/molecules28052349), 2023-03-03
Supplement: s1 [file s1]

Preliminary calculations done using SwissAdme server (<http://www.swissadme.ch/>) (Last accessed on 28 December 2022)

| name   | Compound - structure                                                                | Molecular weight | Consensus Log P |
|--------|-------------------------------------------------------------------------------------|------------------|-----------------|
| Lead 2 | 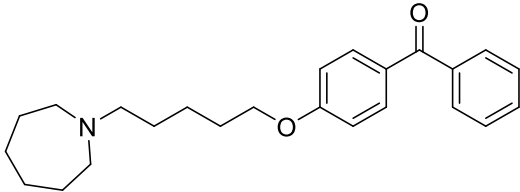   | 365              | 4.82            |
| 15     |    | 317              | 4.16            |
| 14     |    | 303              | 3.79            |
| Lead 3 |   | 380              | 5.18            |
| 17     |  | 331              | 4.45            |
| 16     |  | 317              | 4.15            |
