# Supplementary material for: Multitargeting Histamine H3 Receptor Ligands among Acetyl- and Propionyl-Phenoxyalkyl Derivatives
Source: MDPI journal article supplement (doi:10.3390/molecules28052349), 2023-03-03
Supplement: s1 [file s1]

# Multitargeting histamine H<sub>3</sub> receptor ligands among acetyl- and propionyl-phenoxyalkyl derivatives

Dorota Łażewska<sup>1\*</sup>, Maria Kaleta<sup>1</sup>, Paula Zaręba<sup>2</sup>, Justyna Godyń<sup>2</sup>, Mariam Dubiel<sup>3</sup>, Ewelina Honkisz-Orzechowska<sup>1</sup>, Agata Doroz-Płonka<sup>1</sup>, Anna Więckowska<sup>2</sup>, Holger Stark<sup>3</sup> and Katarzyna Kieć-Kononowicz<sup>1</sup>

<sup>1</sup> Department of Technology and Biotechnology of Drugs, Faculty of Pharmacy, Jagiellonian University Medical College in Kraków, Medyczna 9, 30-688 Krakow, Poland;

<sup>2</sup> Department of Physicochemical Drug Analysis, Jagiellonian University Medical College in Kraków, Medyczna 9, 30-688 Krakow, Poland

<sup>3</sup> Institute of Pharmaceutical and Medicinal Chemistry, Heinrich Heine University Düsseldorf, Universitaetsstr. 1, 40225 Duesseldorf, Germany

\* **Correspondence:** dorota.lazewska@uj.edu.pl;

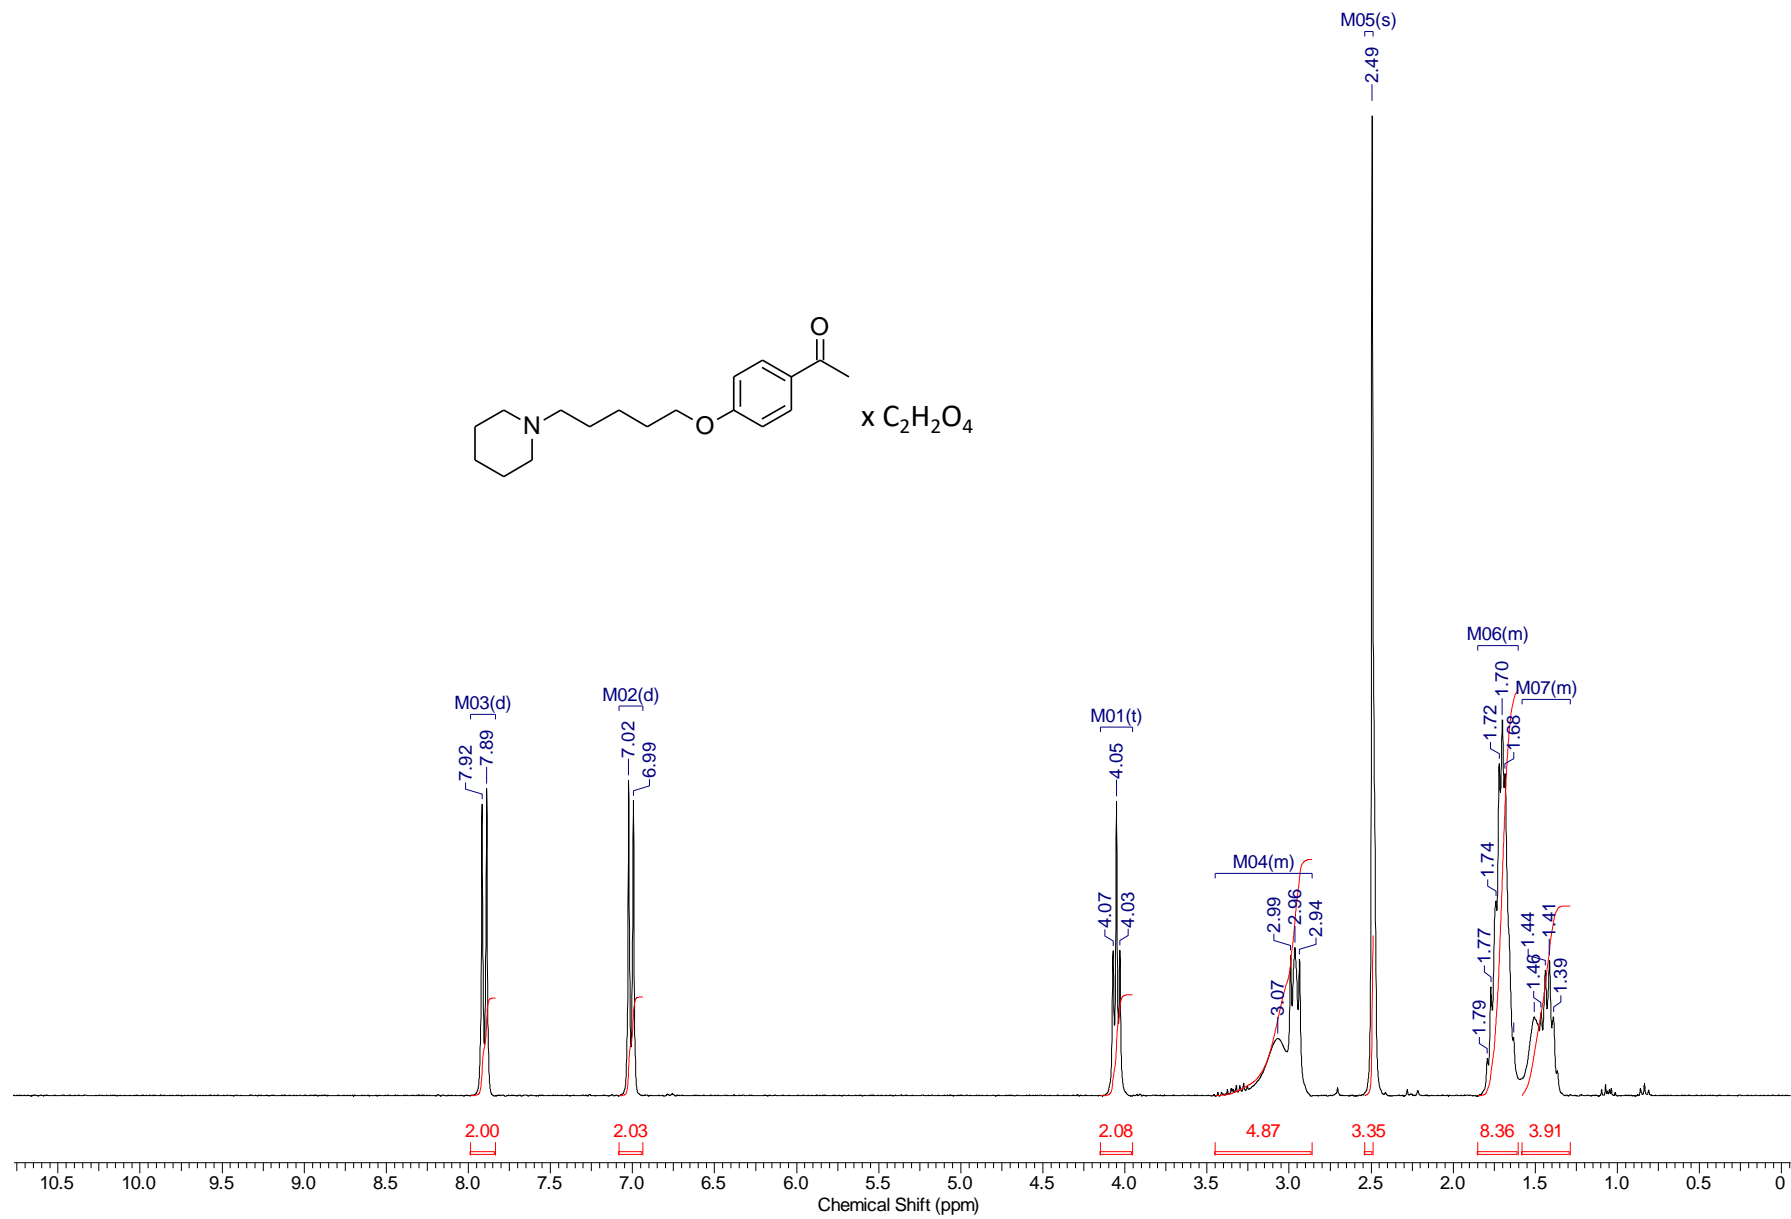

Figure S1.  $^1\text{H}$  NMR spectrum of 1-(4-((piperidin-1-yl)pentyl)oxy)phenyl ethan-1-one hydrogen oxalate (2)

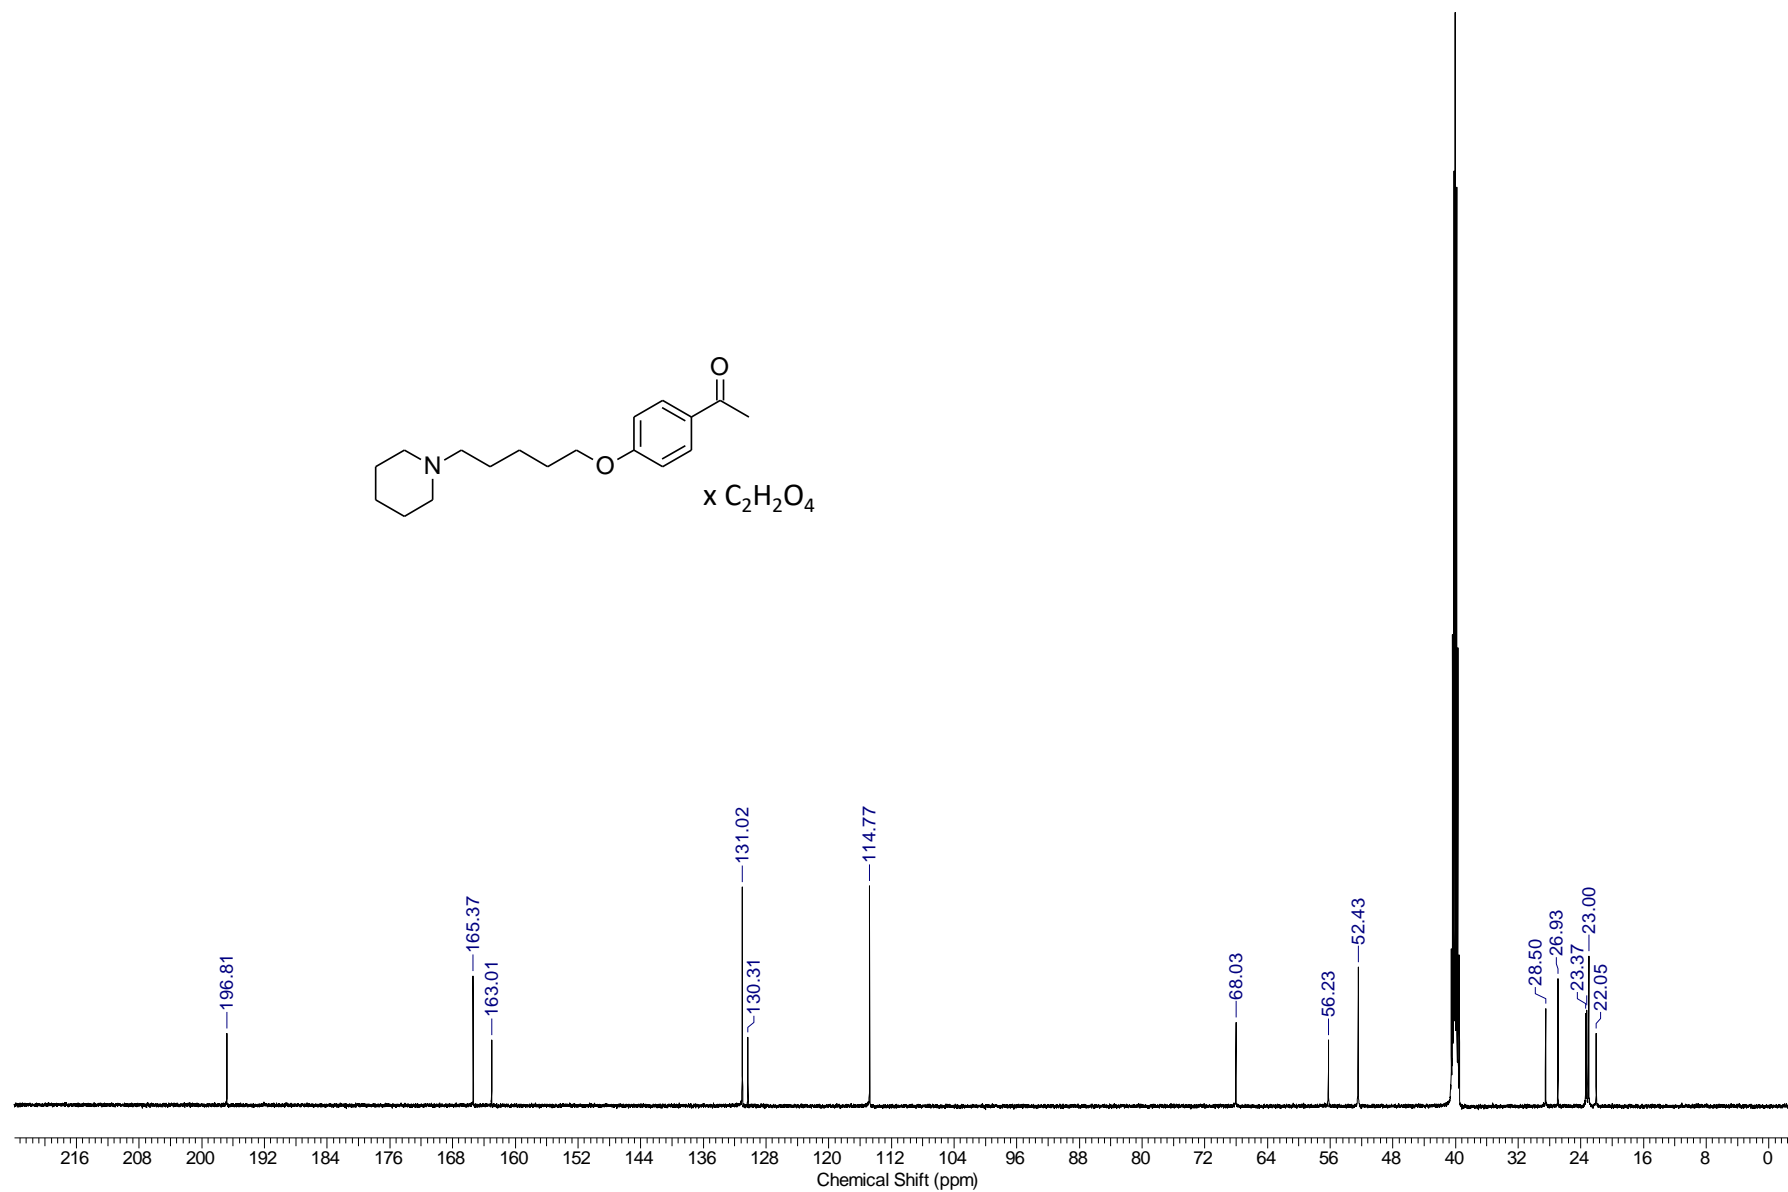

Figure S2.  $^{13}\text{C}$  NMR spectrum of 1-(4-((5-(piperidin-1-yl)pentyl)oxy)phenyl)ethan-1-one hydrogen oxalate (2)

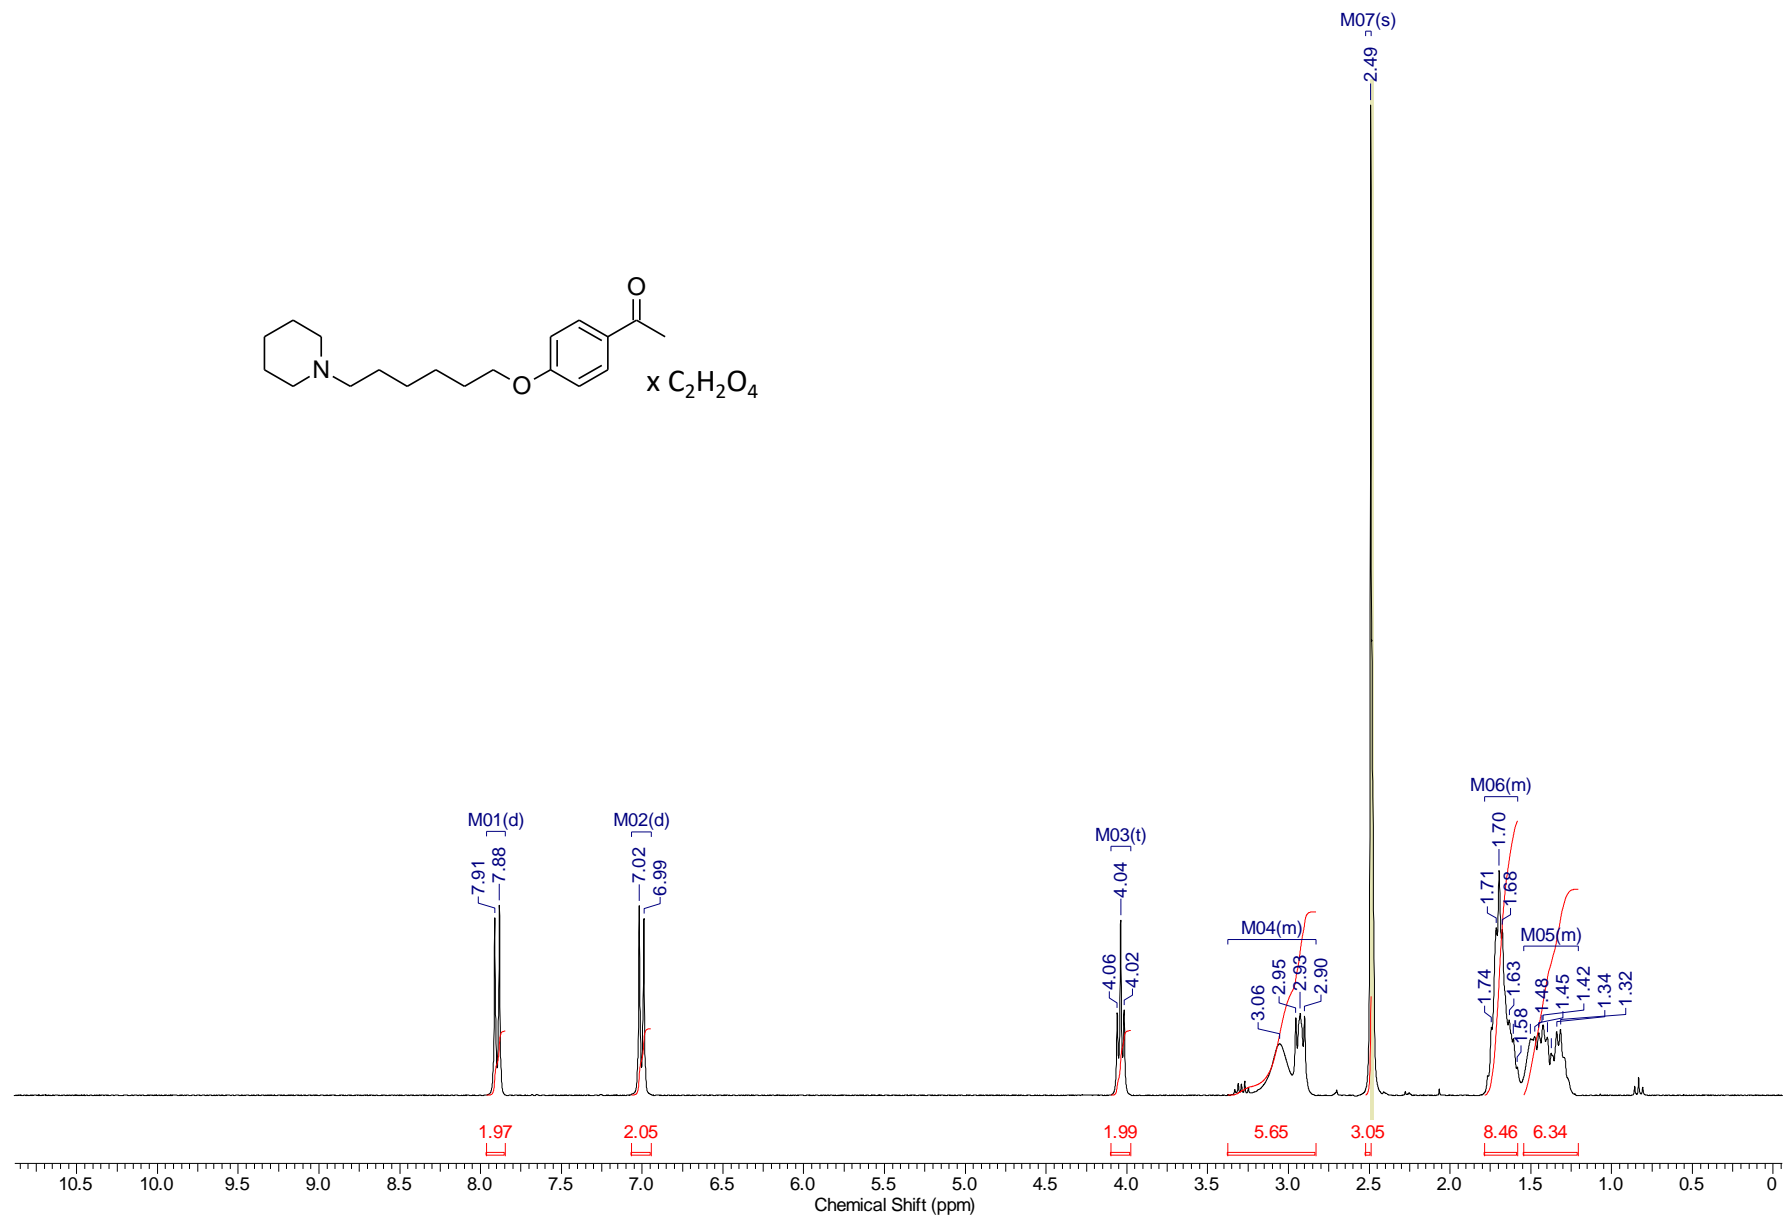

Figure S3.  $^1\text{H}$  NMR spectrum of 1-(4-((6-(piperidin-1-yl)hexyl)oxy)phenyl)ethan-1-one hydrogen oxalate (**3**)

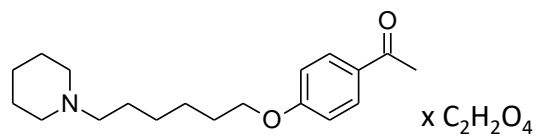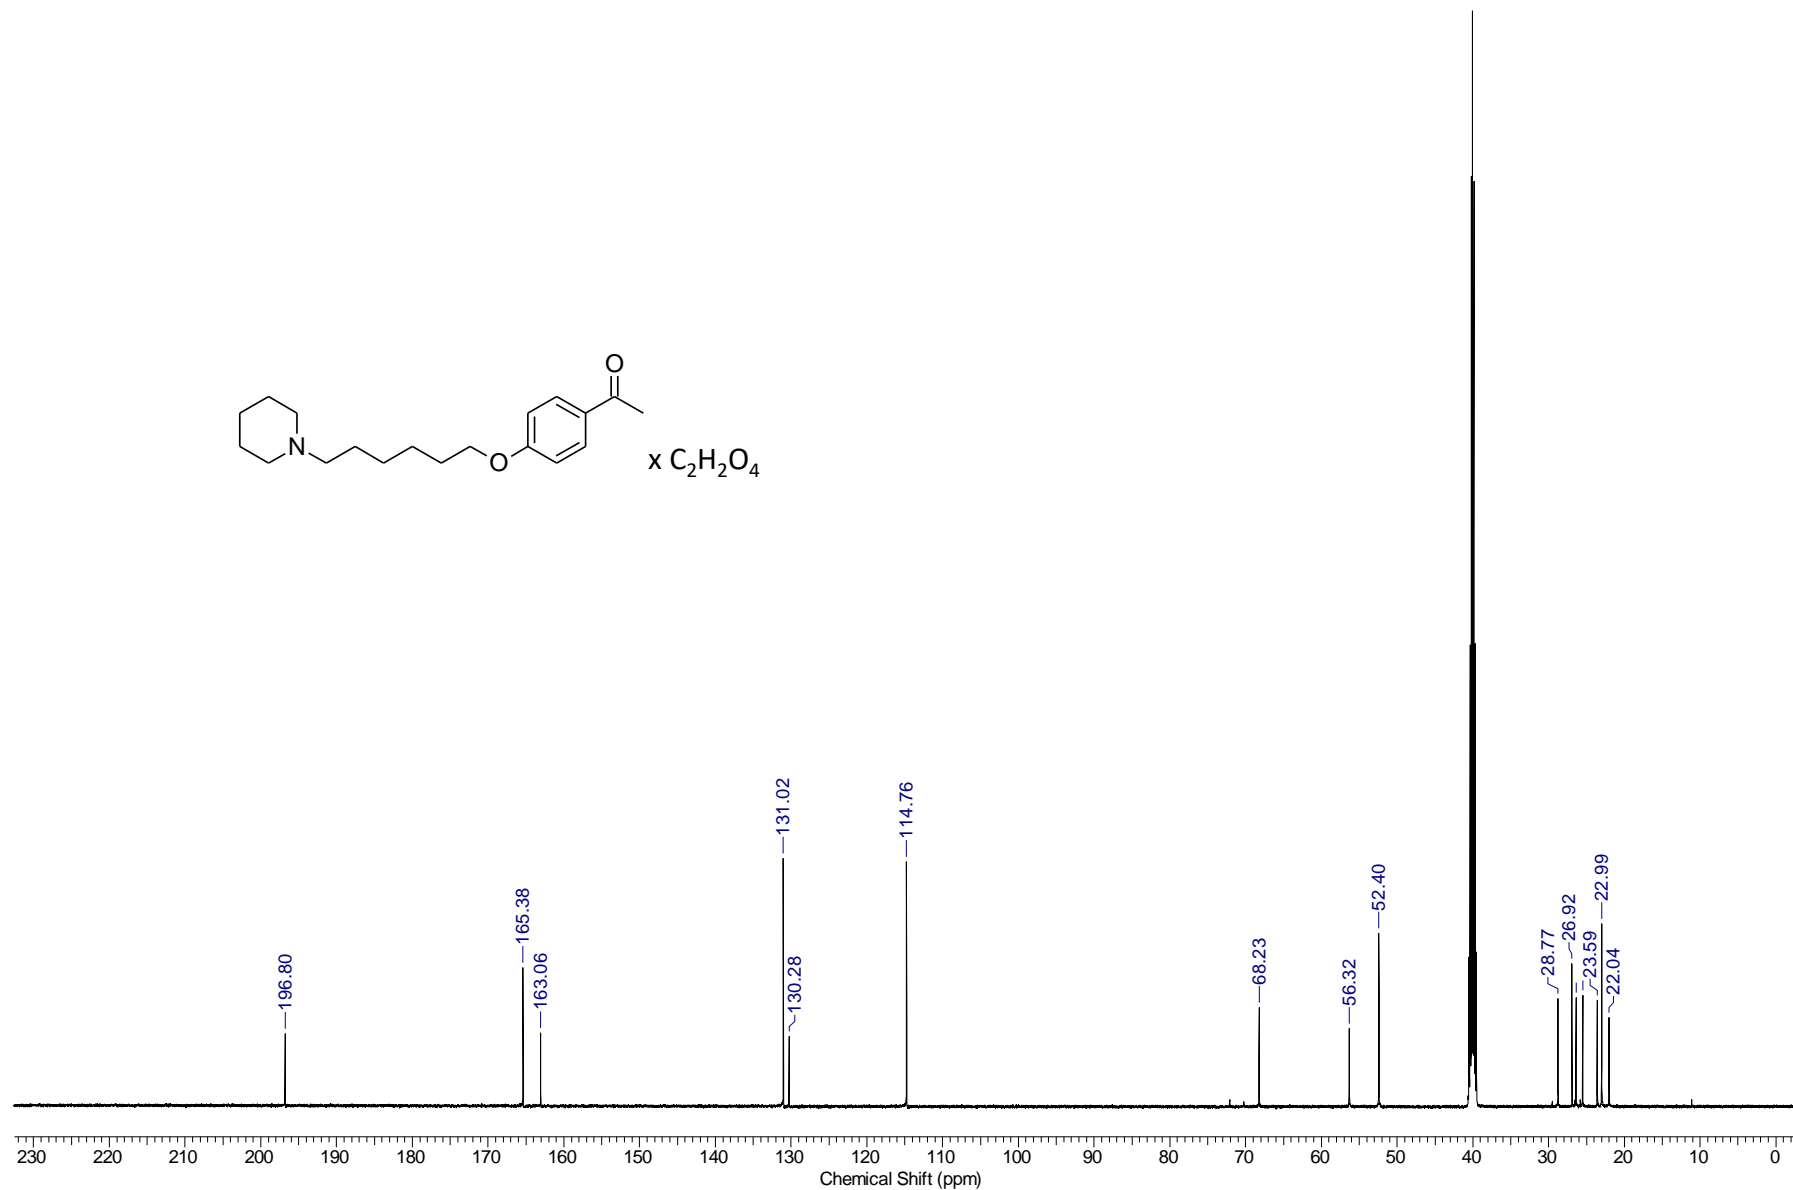

Figure S4.  $^{13}\text{C}$  NMR spectrum of 1-(4-((6-(piperidin-1-yl)hexyl)oxy)phenyl)ethan-1-one hydrogen oxalate (3)

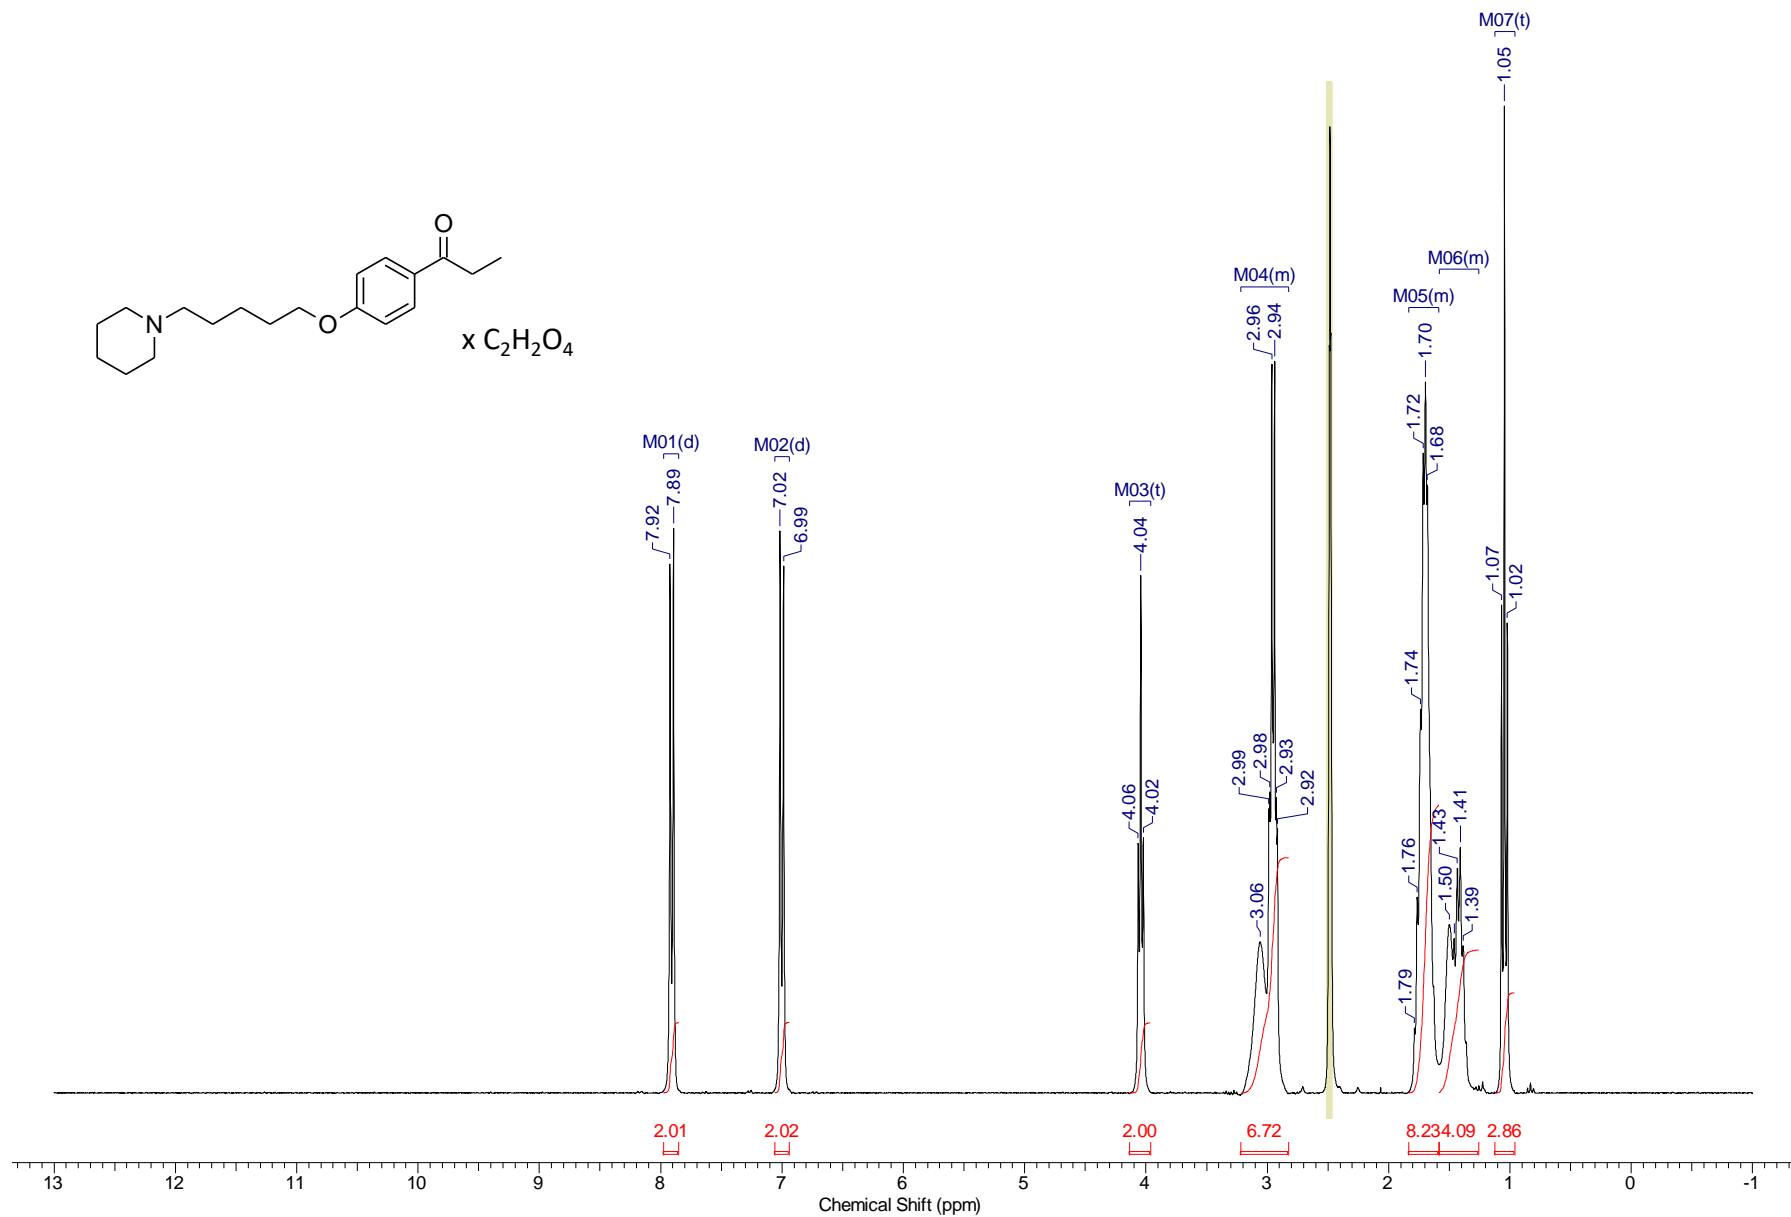

Figure S5.  $^1\text{H}$  NMR spectrum of 1-(4-((5-(piperidin-1-yl)pentyl)oxy)phenyl)ethan-1-one hydrogen oxalate (**4**)

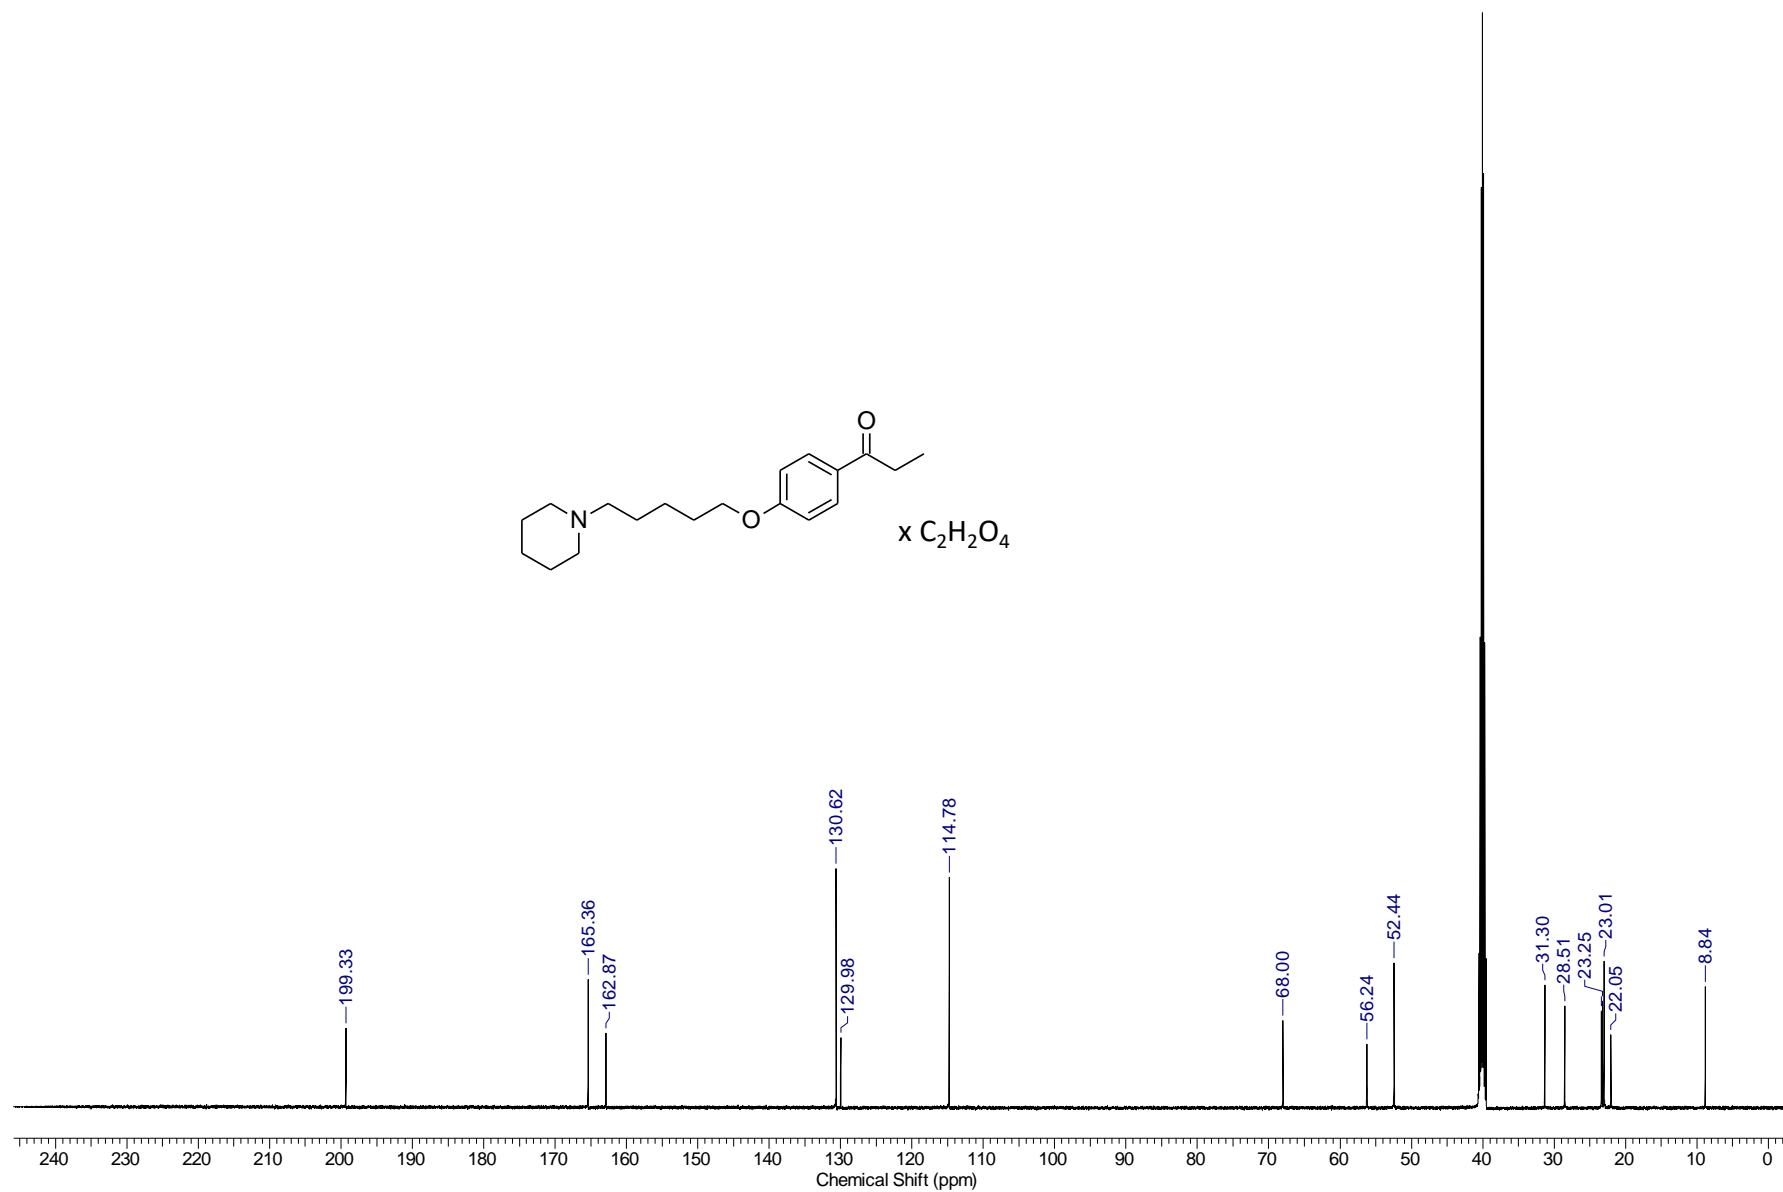

Figure S6.  $^{13}\text{C}$  NMR spectrum of 1-(4-((5-(piperidin-1-yl)pentyl)oxy)phenyl)ethan-1-one hydrogen oxalate (4)

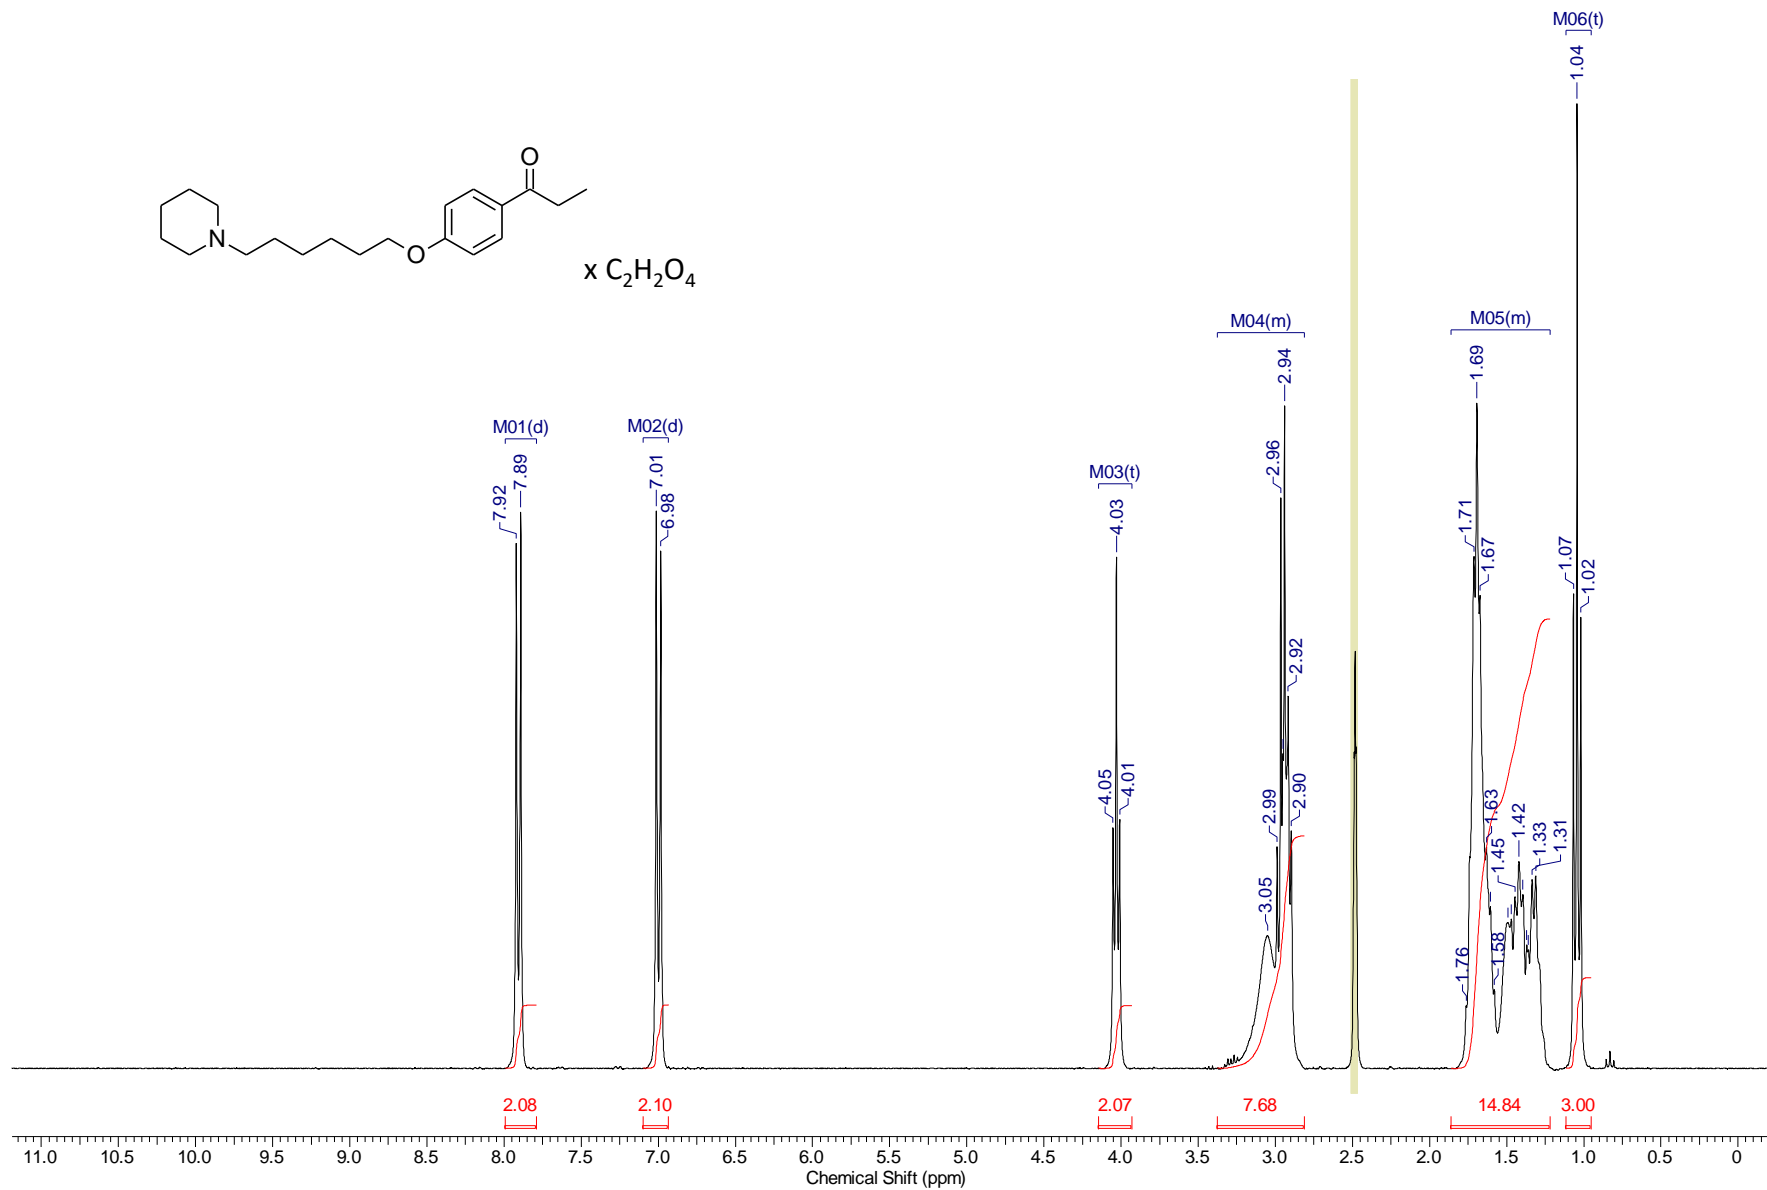

Figure S7.  $^1\text{H}$  NMR spectrum of 1-(4-((6-(piperidin-1-yl)hexyl)oxy)phenyl)propan-1-one hydrogen oxalate (5)



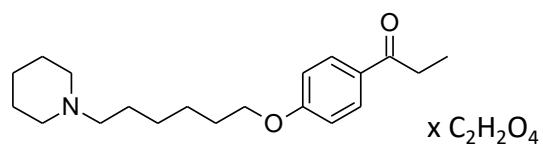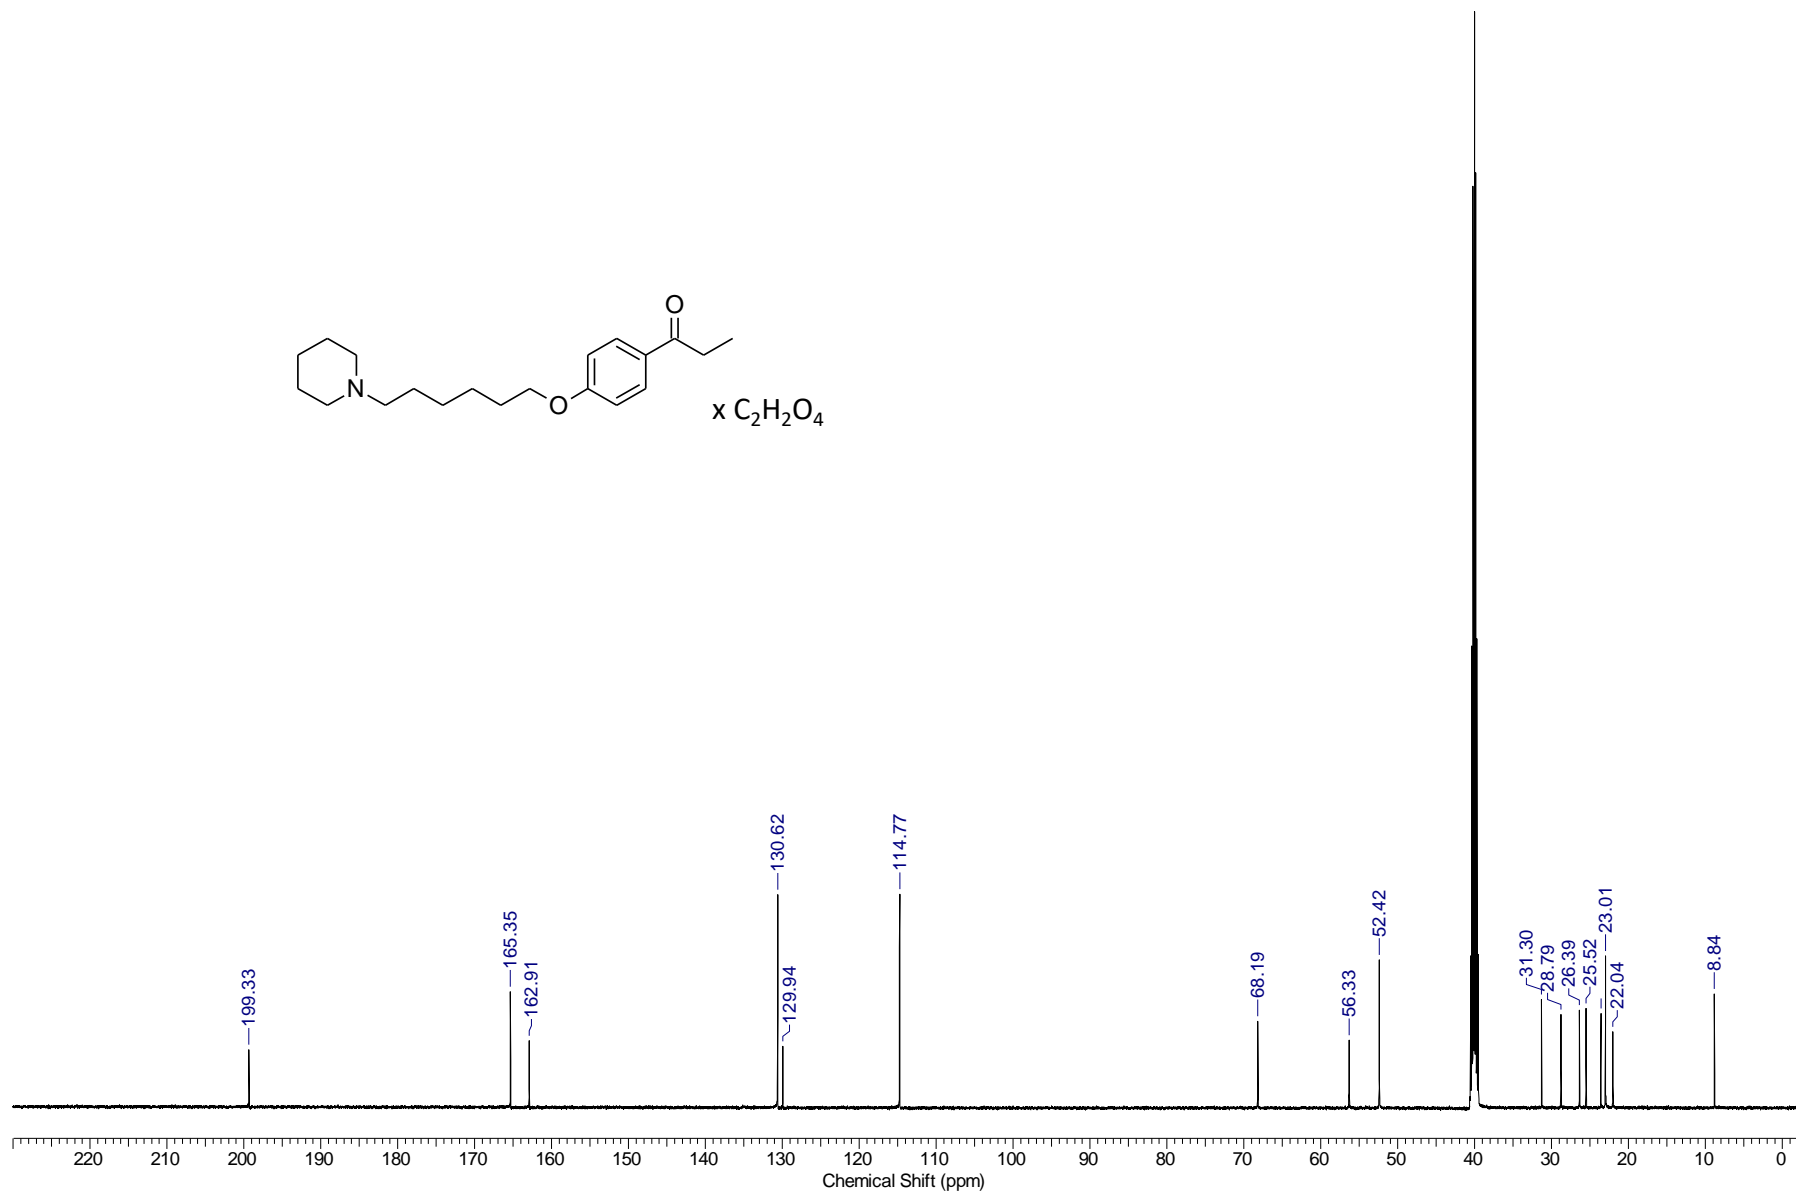

Figure S8.  $^{13}\text{C}$  NMR spectrum of 1-(4-((6-(piperidin-1-yl)hexyl)oxy)phenyl)propan-1-one hydrogen oxalate (5)

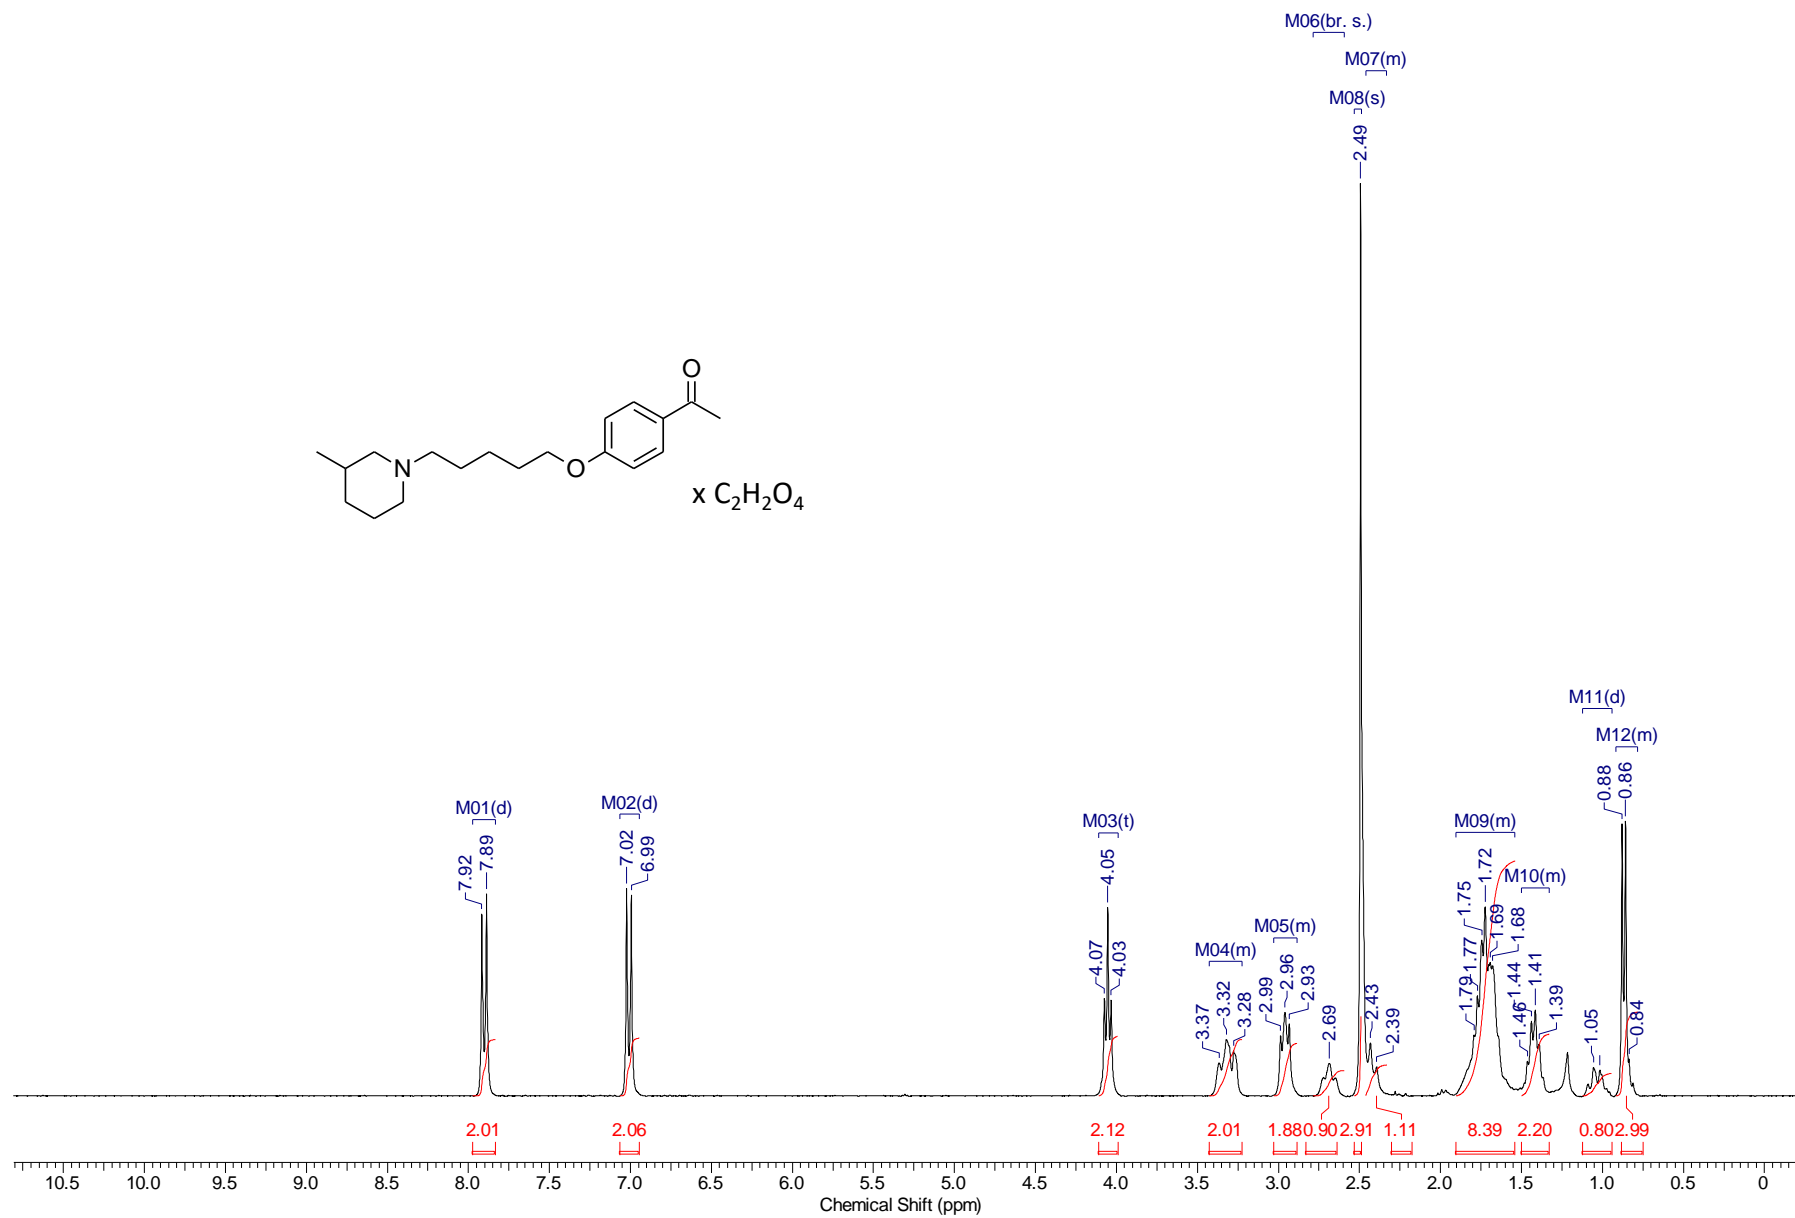

Figure S9.  $^1\text{H}$  NMR spectrum 1-(4-((5-(3-methylpiperidin-1-yl)pentyl)oxy)phenyl)ethan-1-one hydrogen oxalate (**6**)

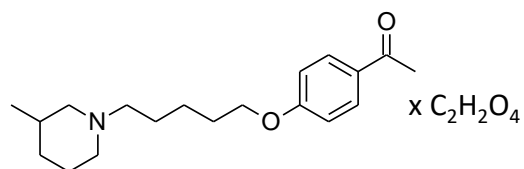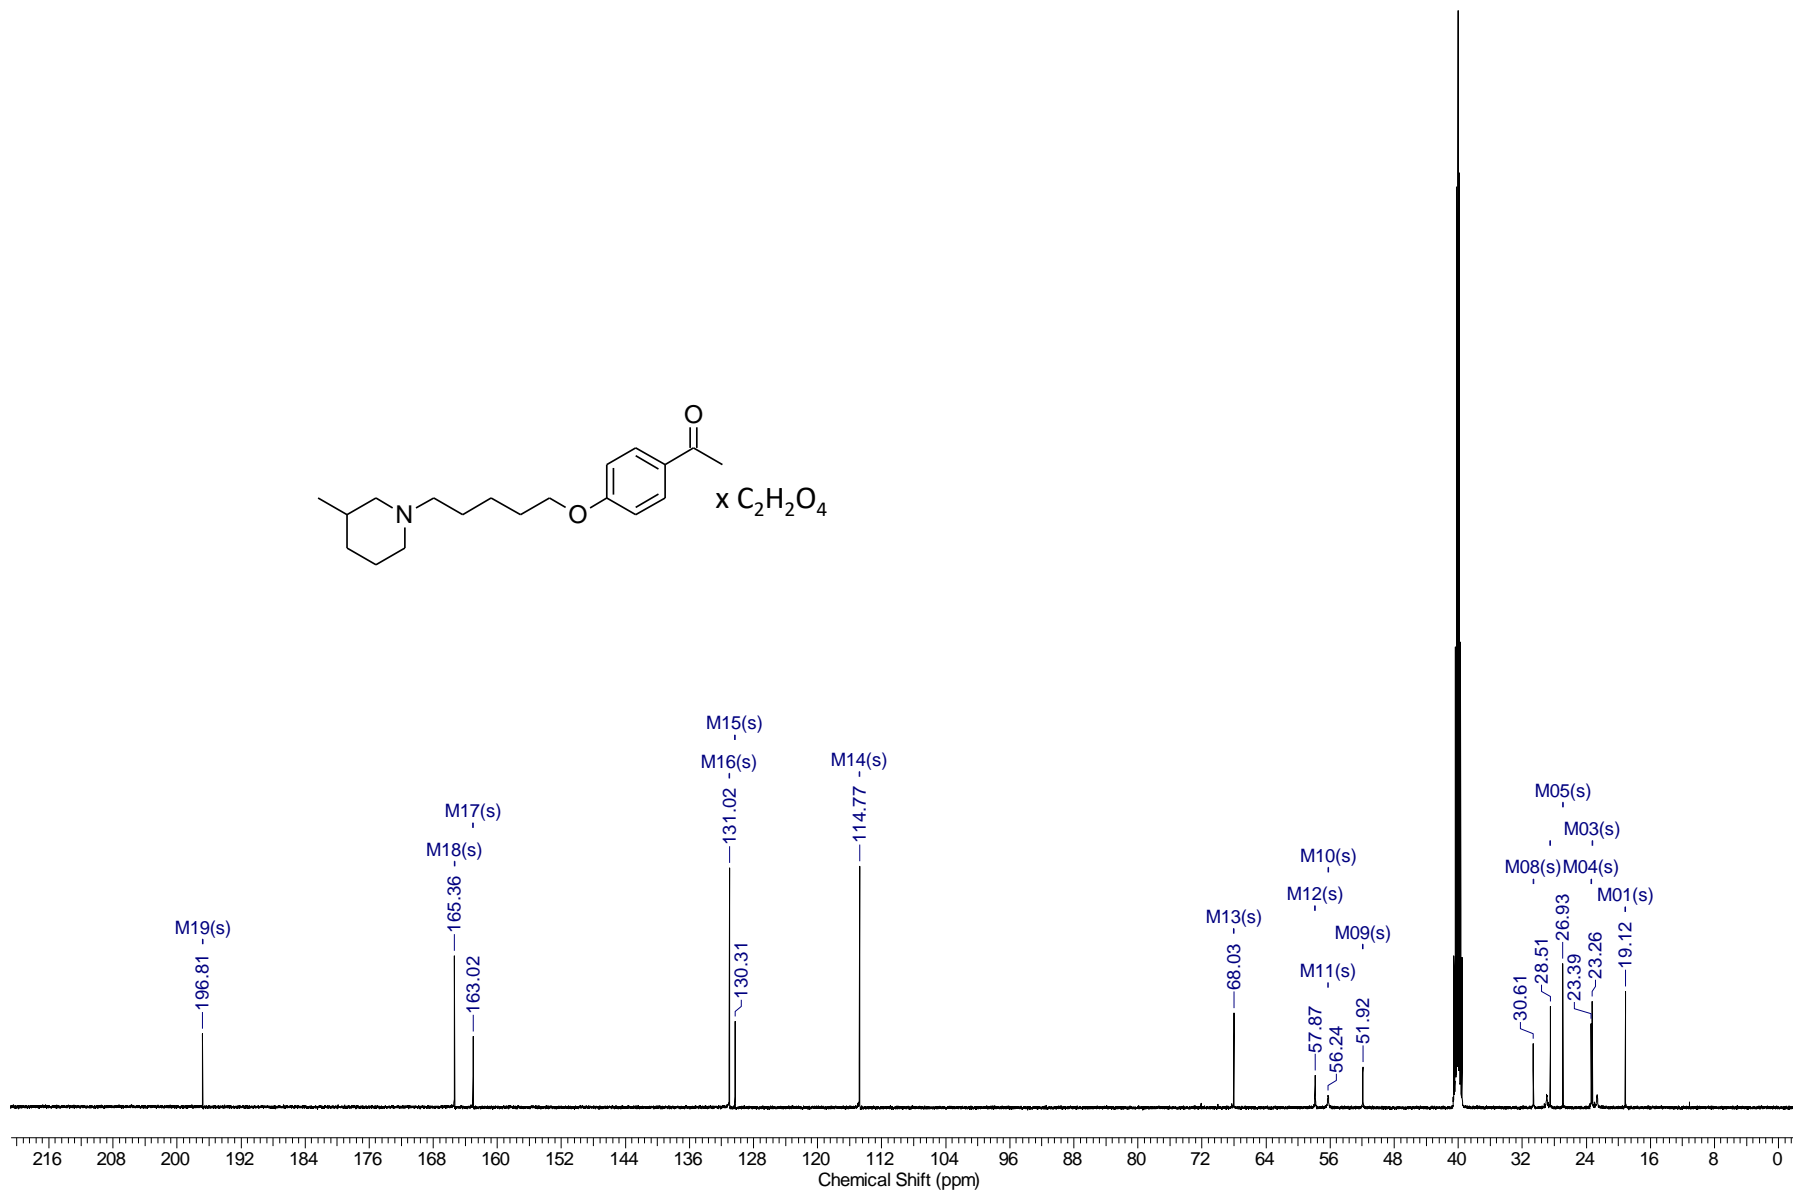

Figure S10. <sup>13</sup>C NMR spectrum of 1-(4-((5-(3-methylpiperidin-1-yl)pentyl)oxy)phenyl)ethan-1-one hydrogen oxalate (6)

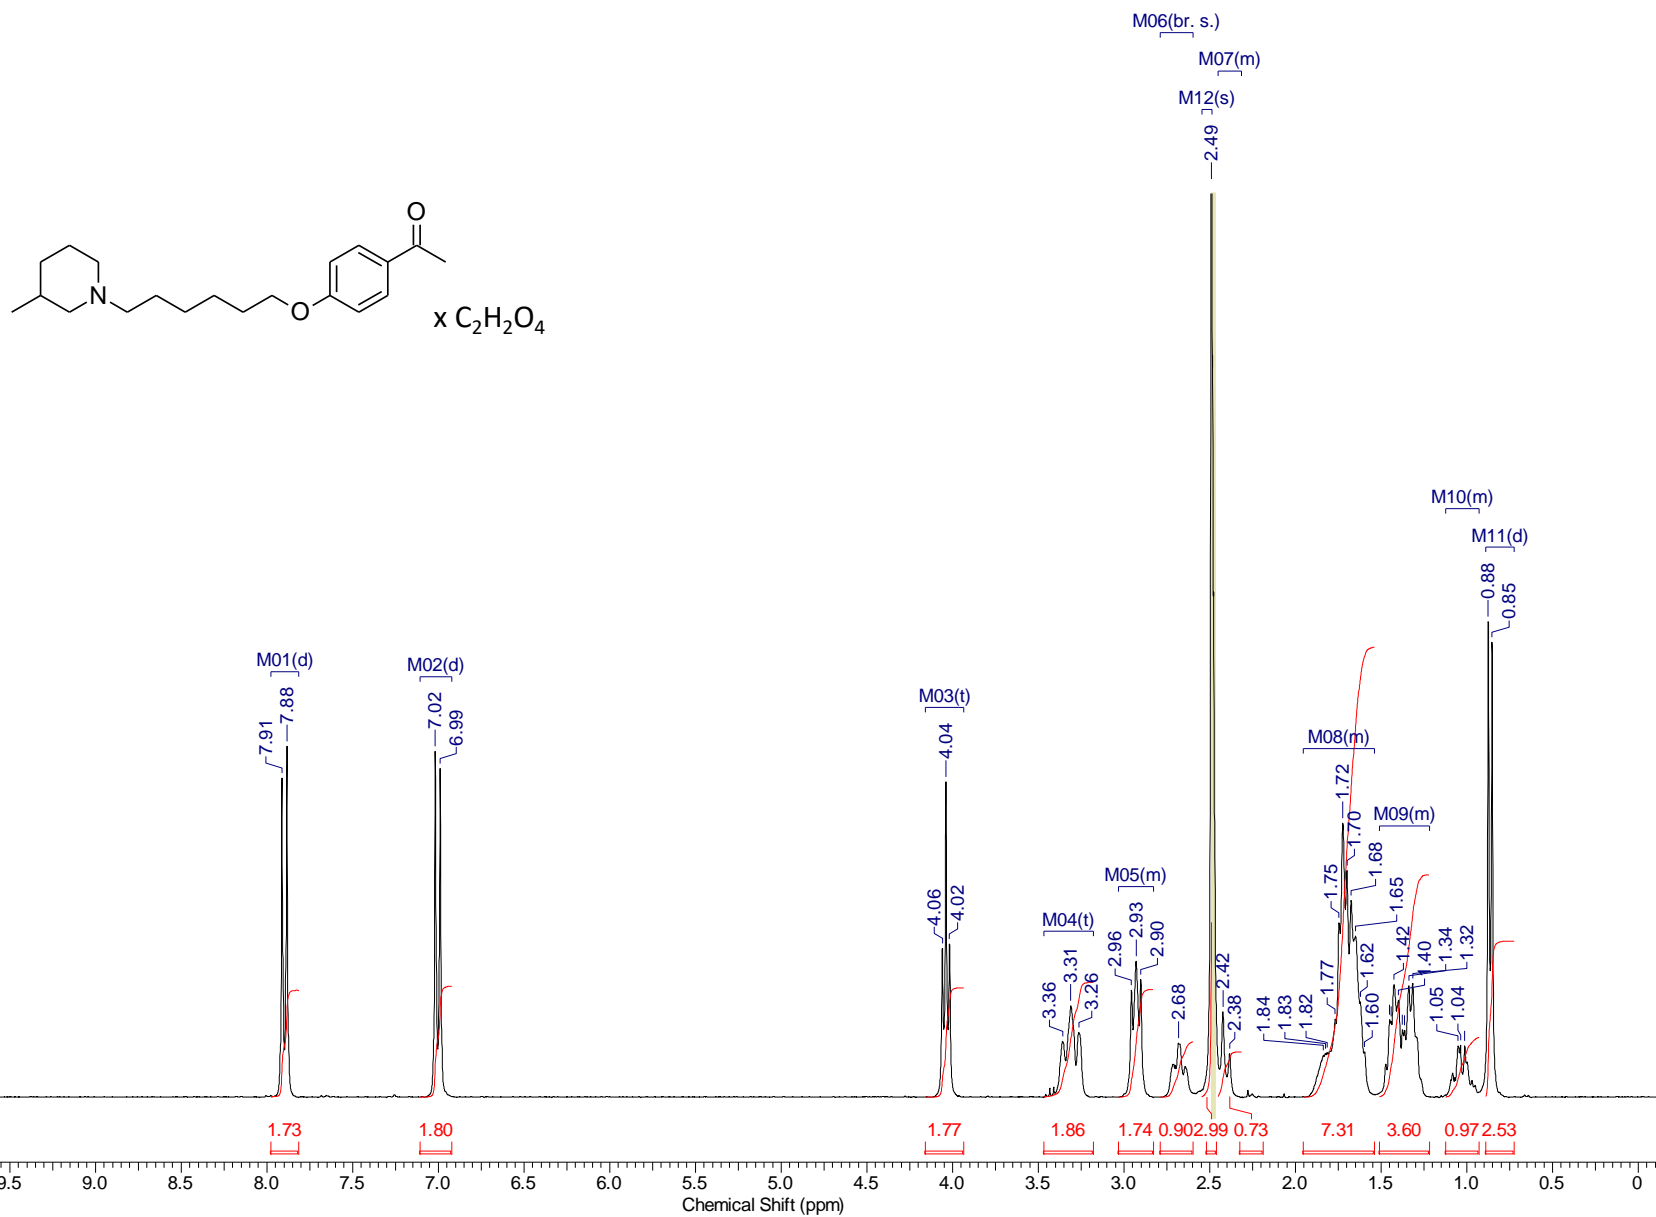

Figure S11.  $^1\text{H}$  NMR spectrum of 1-(4-((6-(3-methylpiperidin-1-yl)hexyl)oxy)phenyl)ethan-1-one hydrogen oxalate (7)

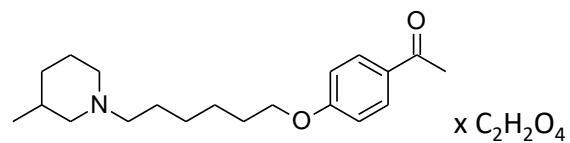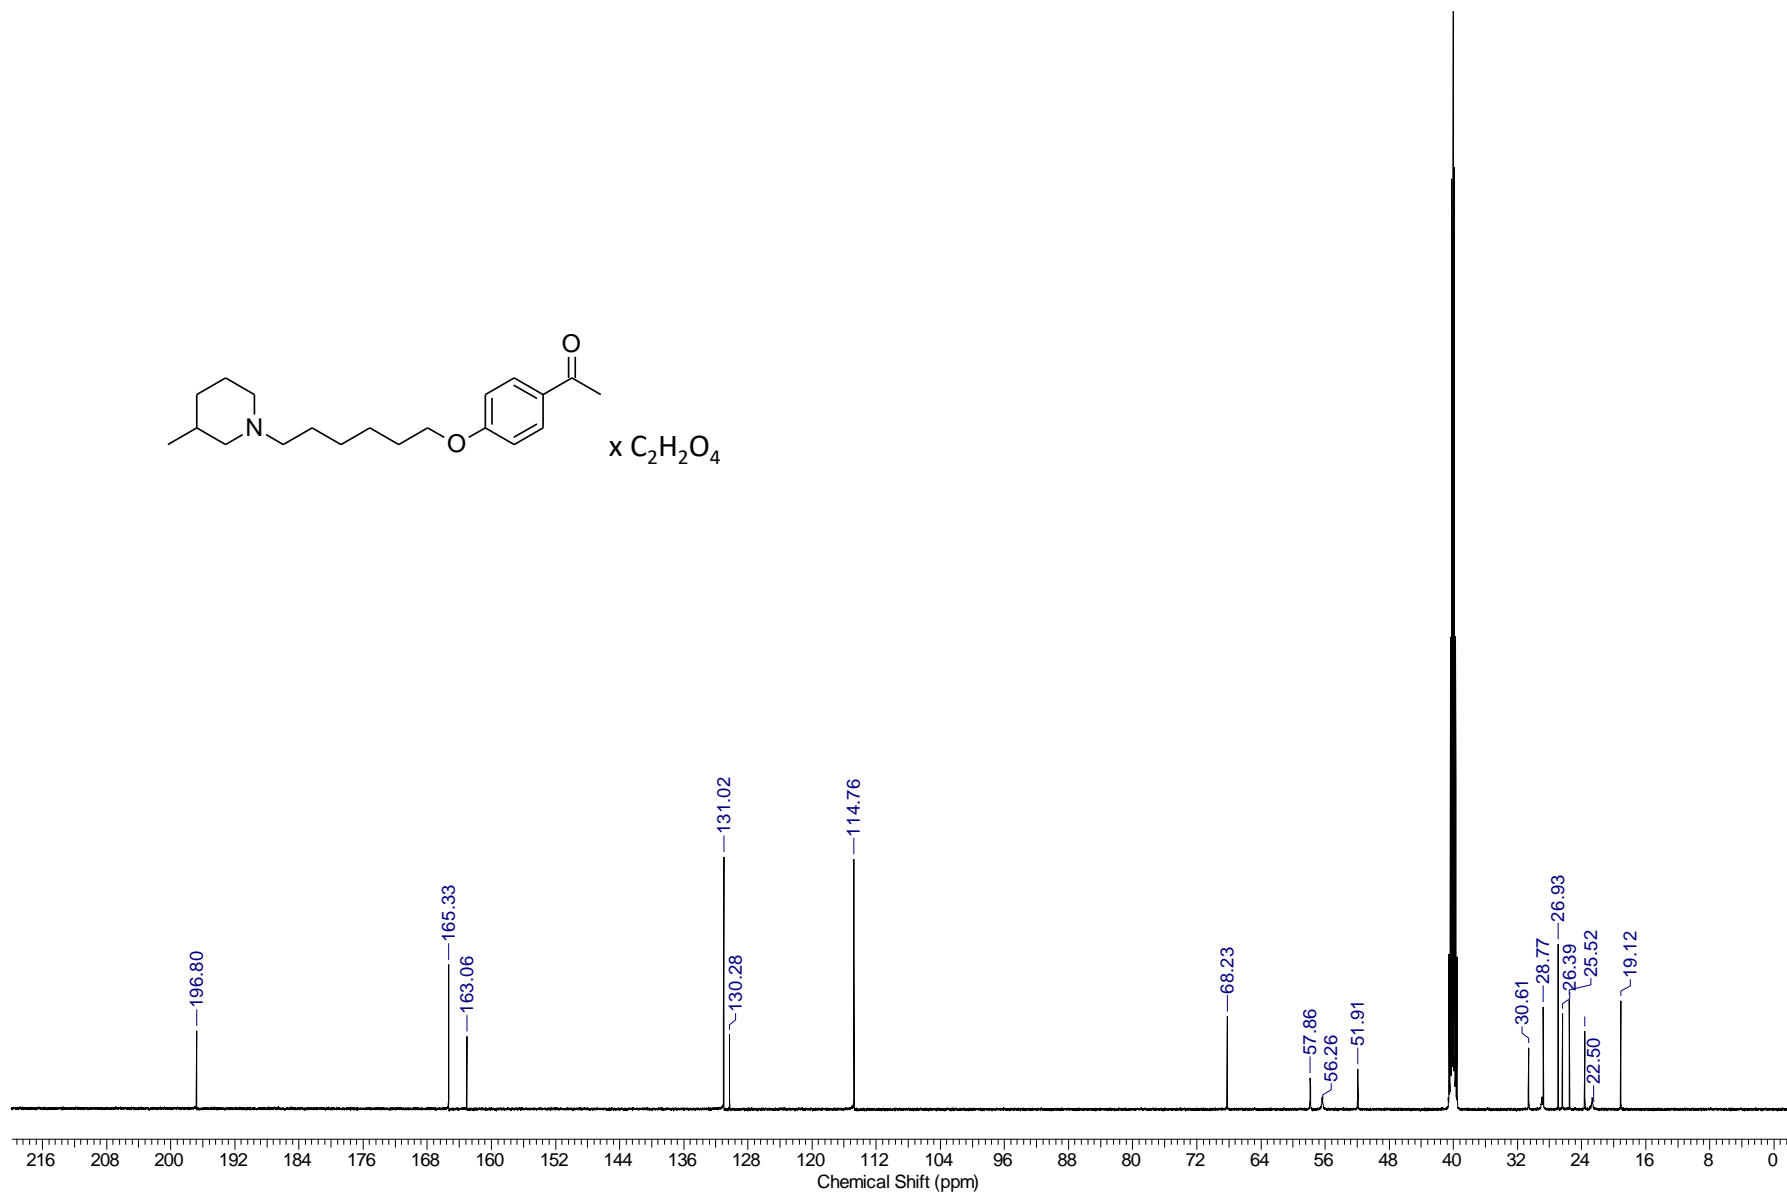

Figure S12. <sup>13</sup>C NMR spectrum of 1-(4-((6-(3-methylpiperidin-1-yl)hexyl)oxy)phenyl)ethan-1-one hydrogen oxalate (7)

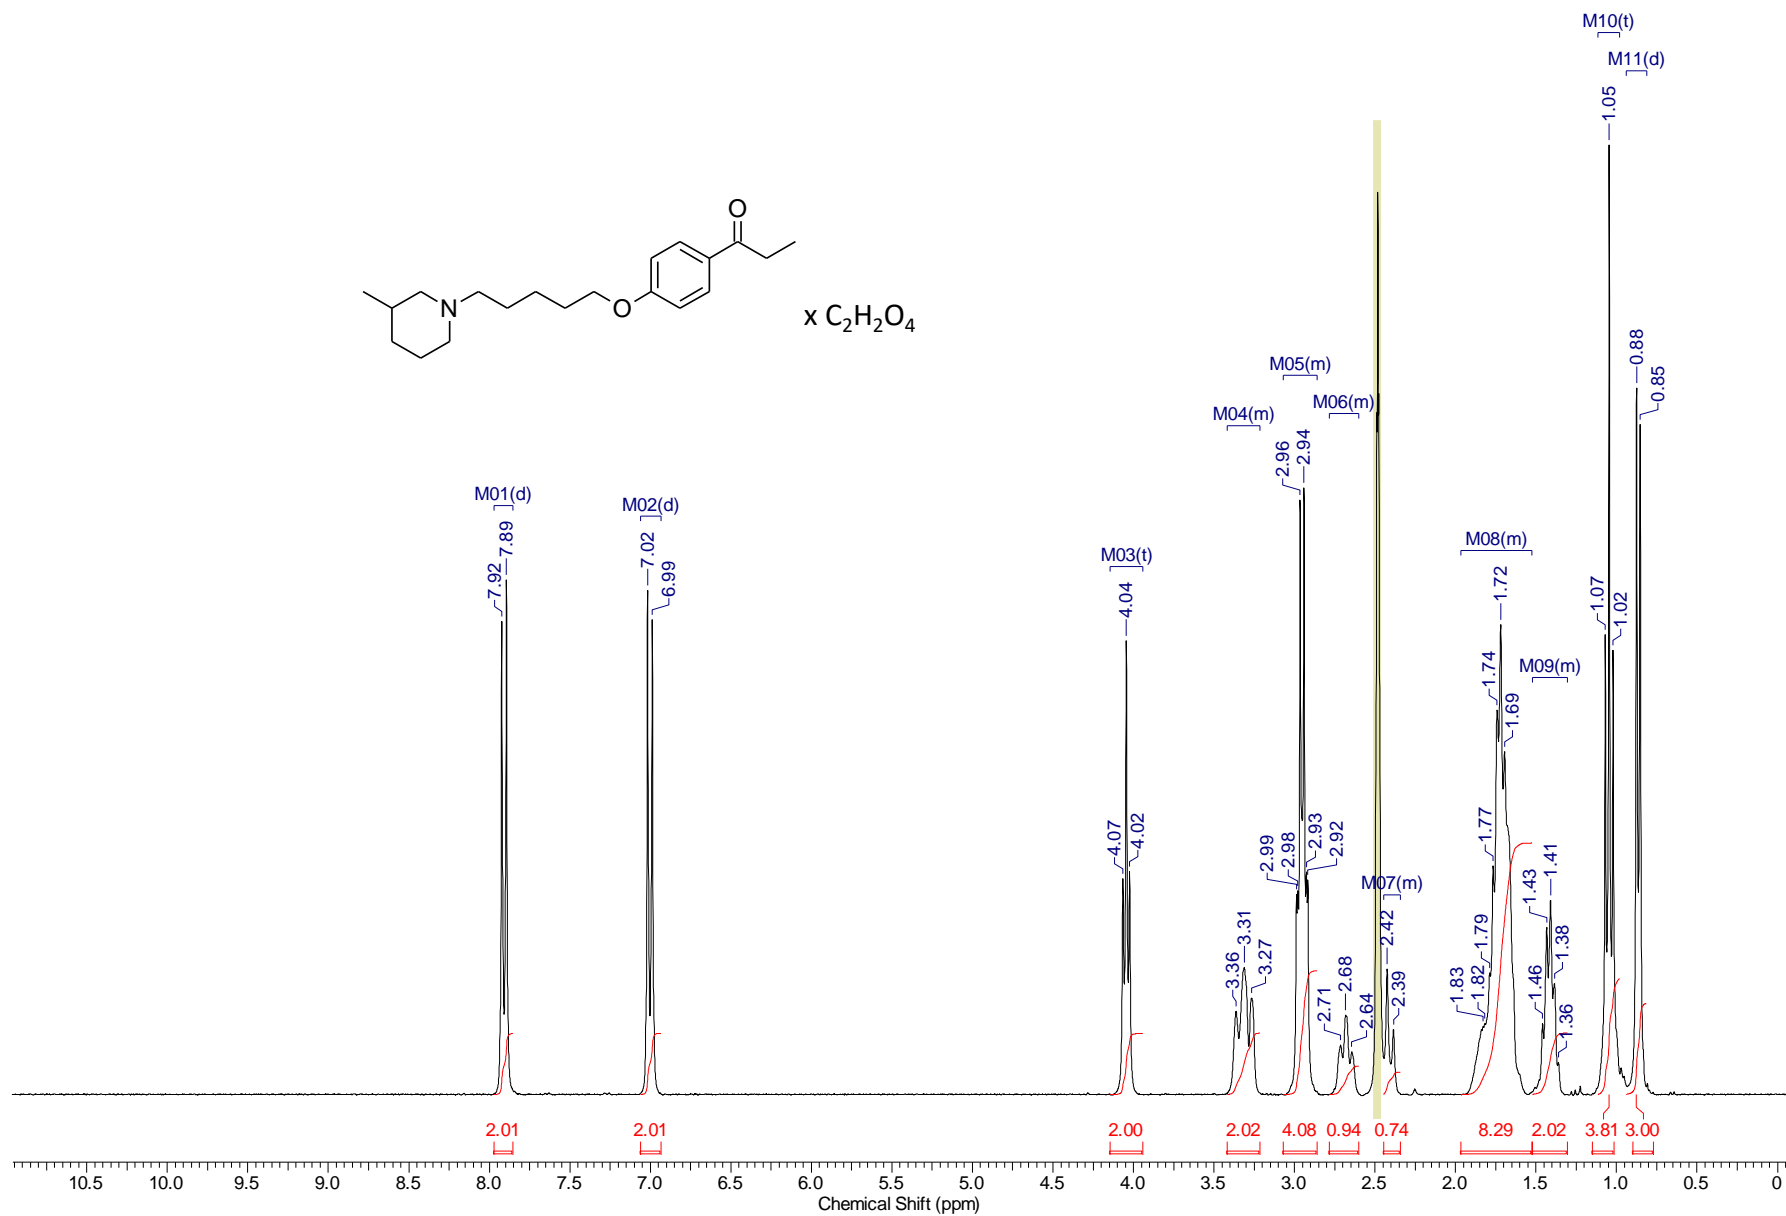

Figure S13.  $^1\text{H}$  NMR spectrum of 1-(4-((5-(3-methylpiperidin-1-yl)pentyl)oxy)phenyl)propan-1-one hydrogen oxalate (8)

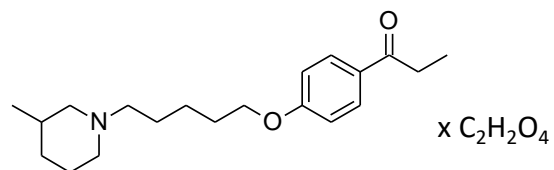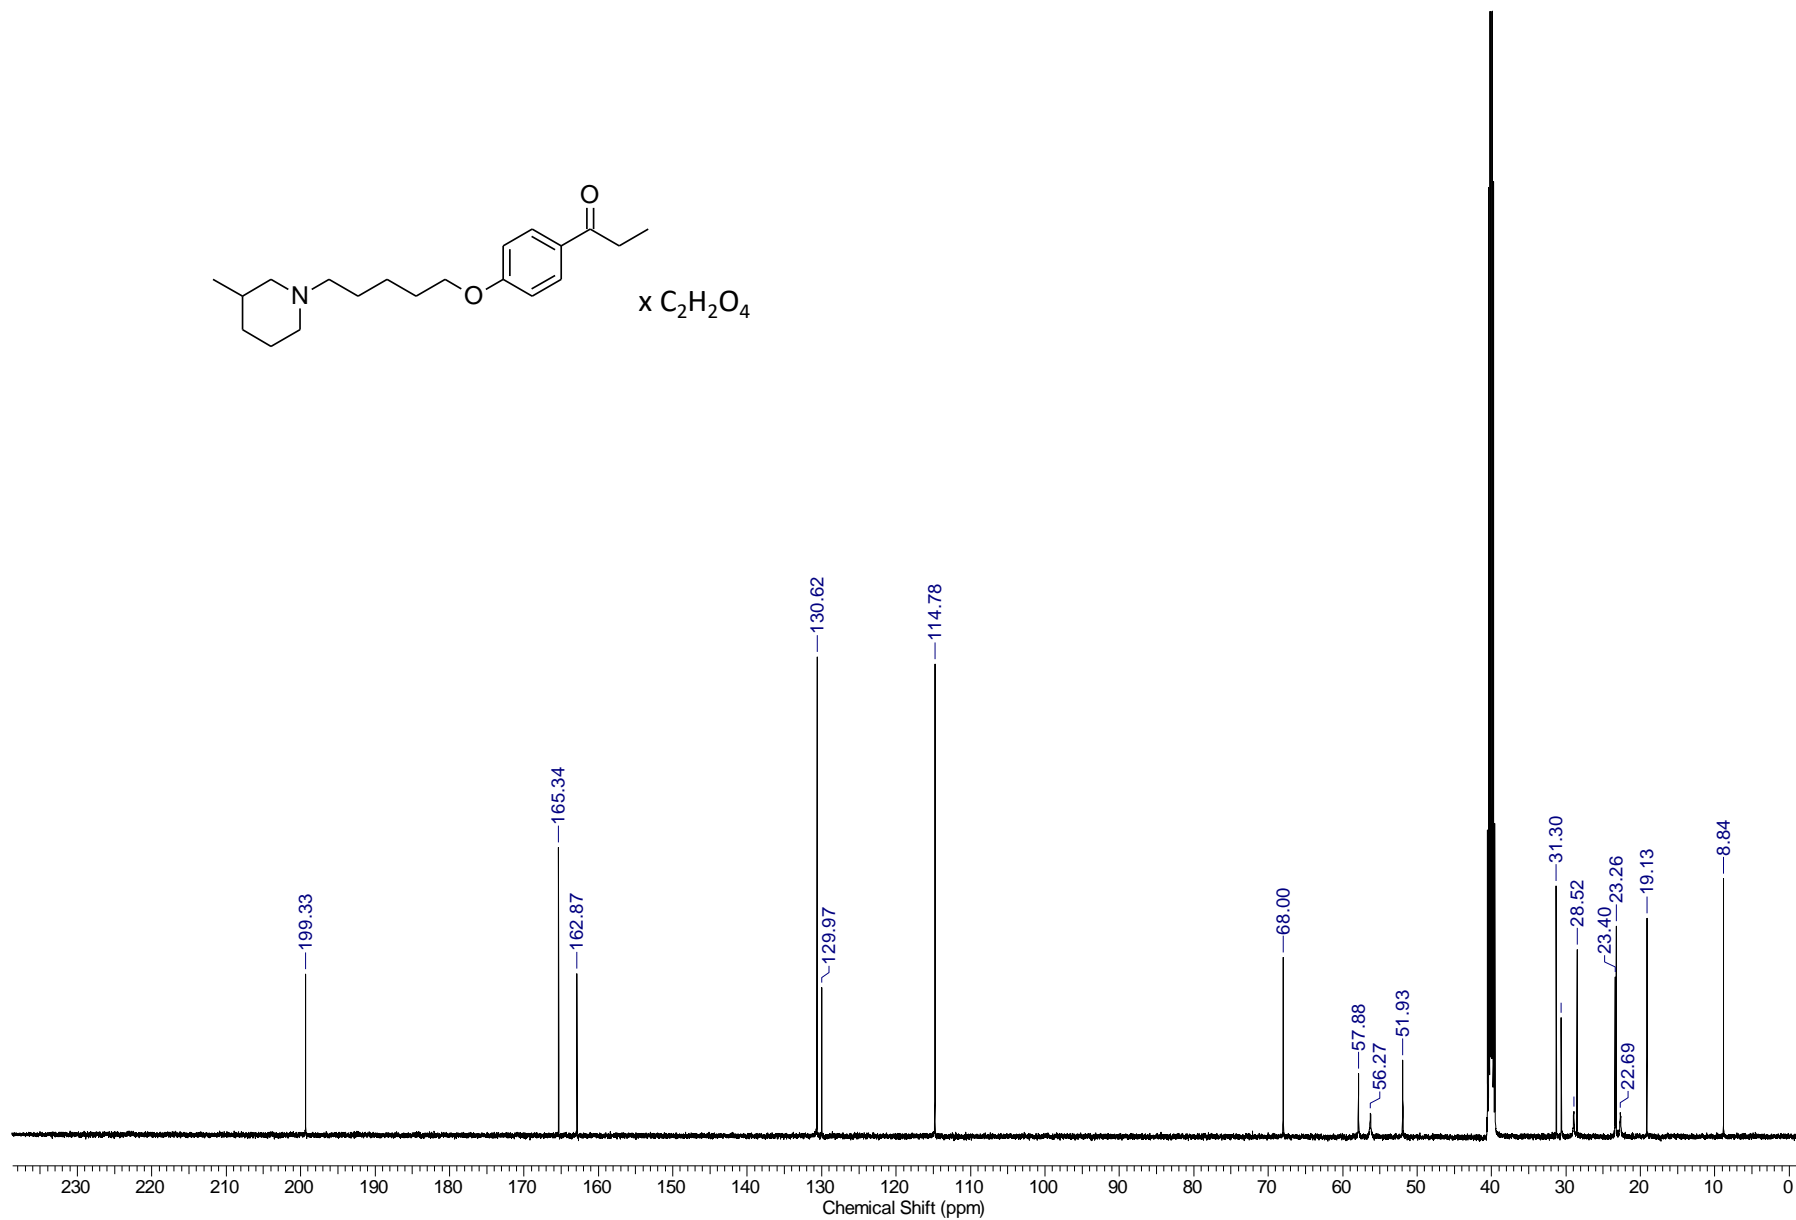

Figure S14. <sup>13</sup>C NMR spectrum of 1-(4-((5-(3-methylpiperidin-1-yl)pentyl)oxy)phenyl)propan-1-one hydrogen oxalate (8)

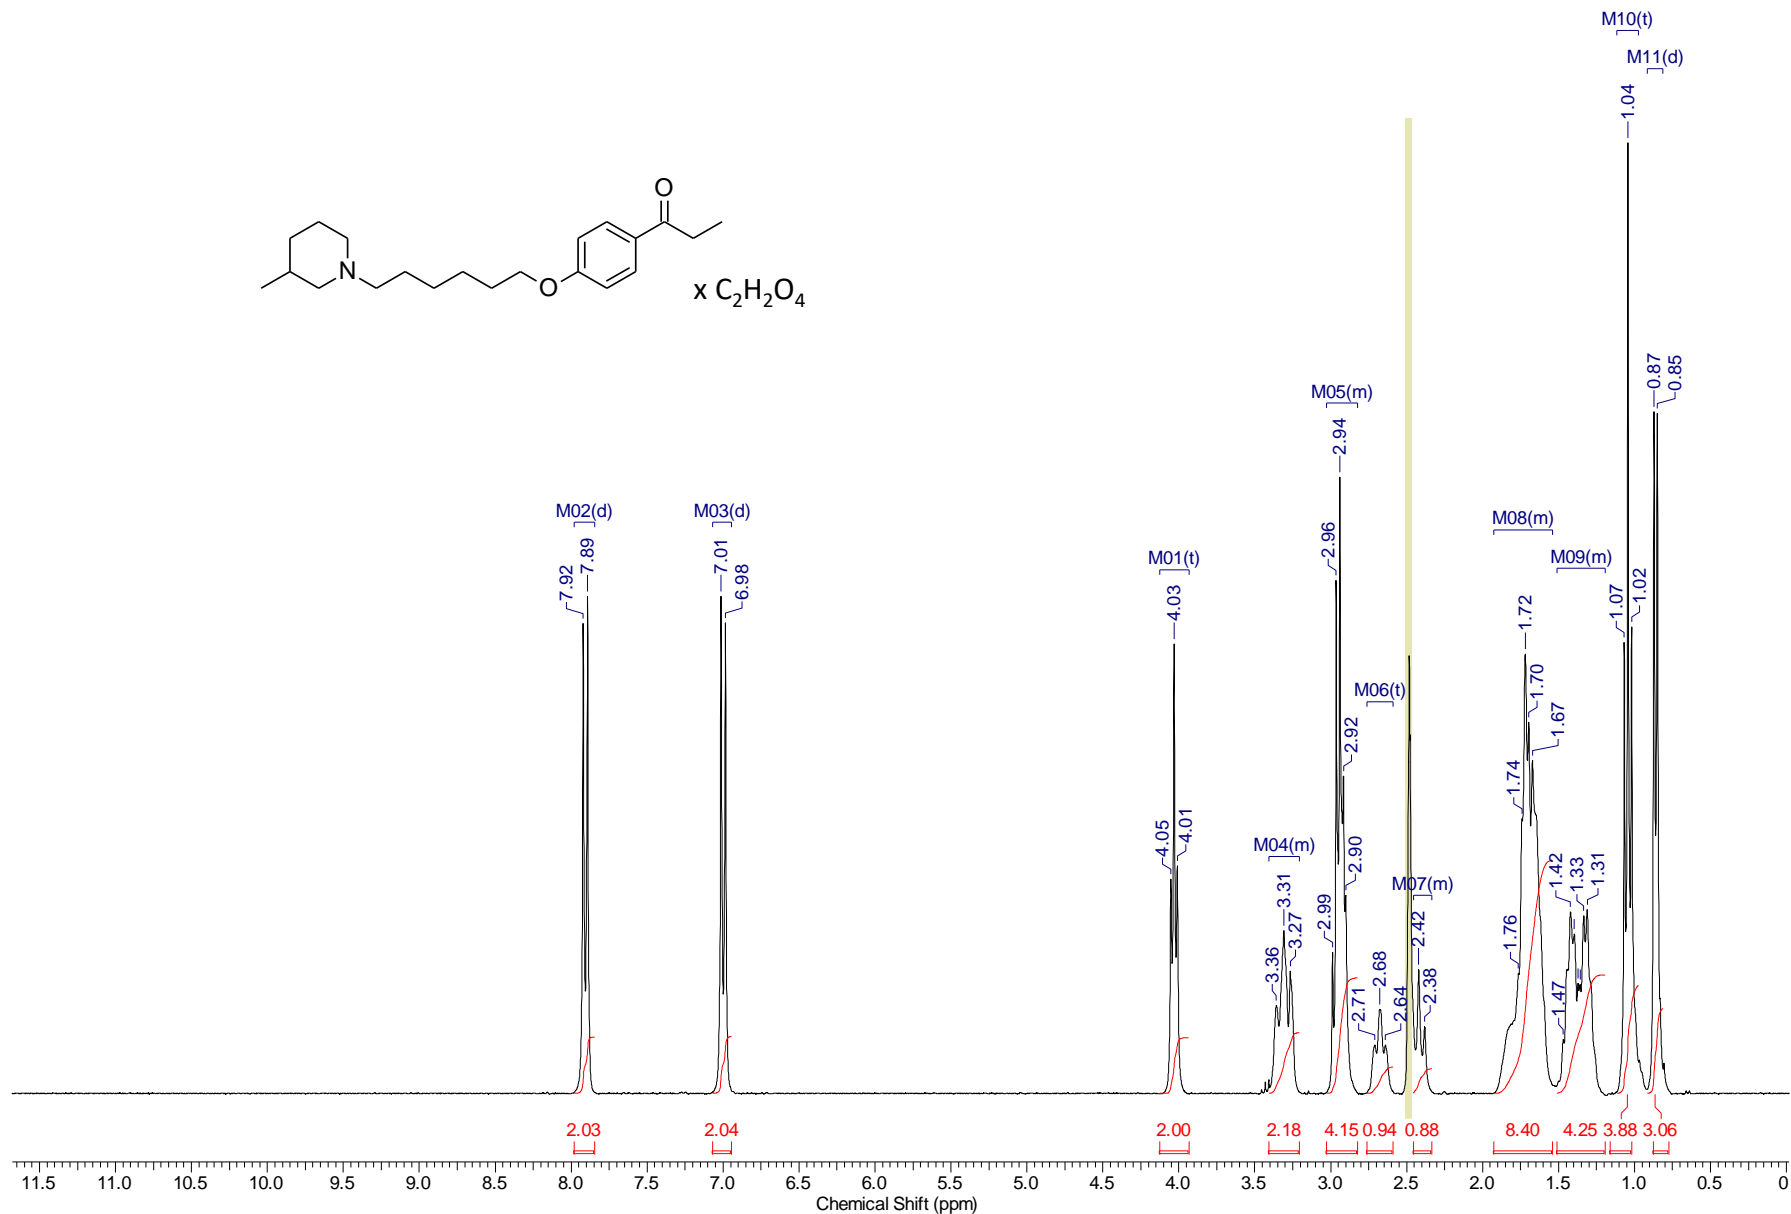

Figure S15.  $^1\text{H}$  NMR spectrum of 1-(4-((5-(3-methylpiperidin-1-yl)pentyl)oxy)phenyl)propan-1-one hydrogen oxalate (9)



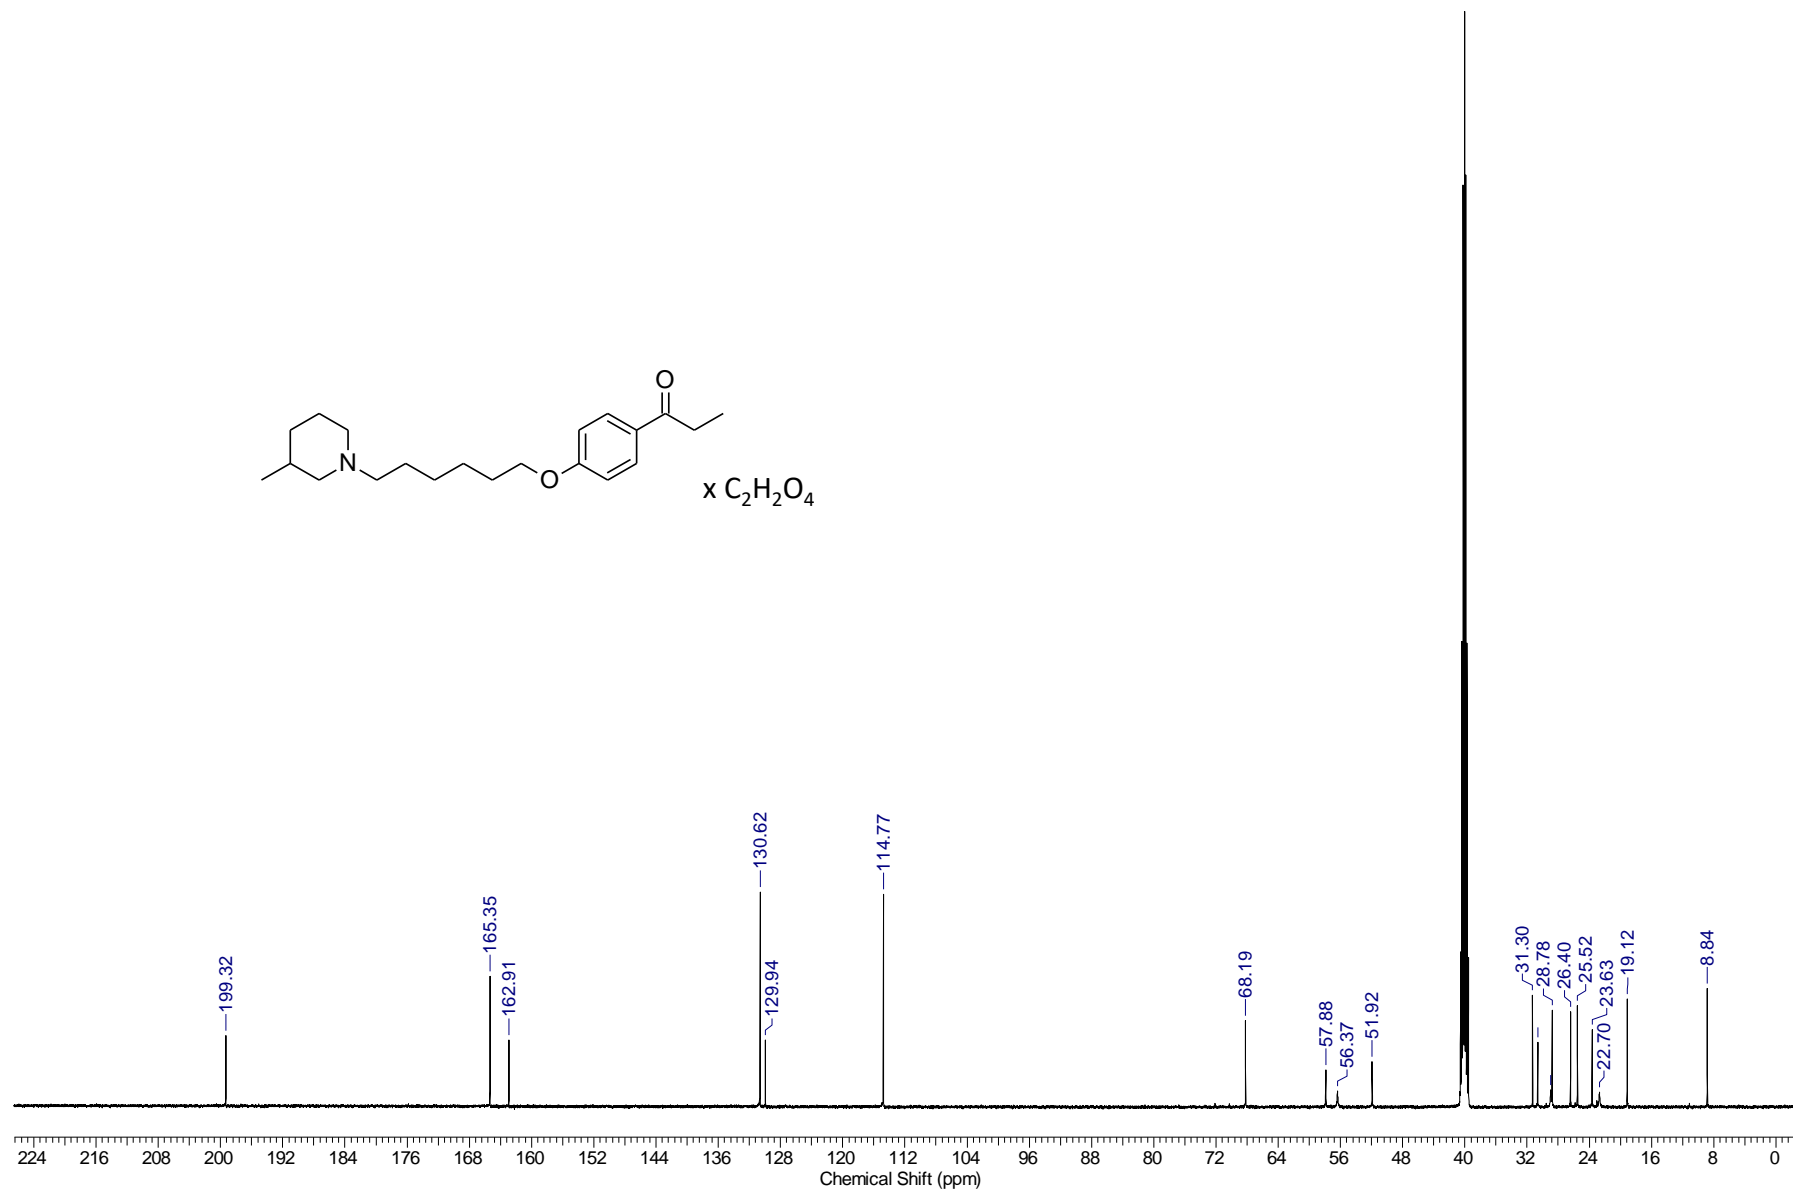

Figure S16.  $^{13}\text{C}$  NMR spectrum of 1-(4-((5-(3-methylpiperidin-1-yl)pentyl)oxy)phenyl)propan-1-one hydrogen oxalate (9)

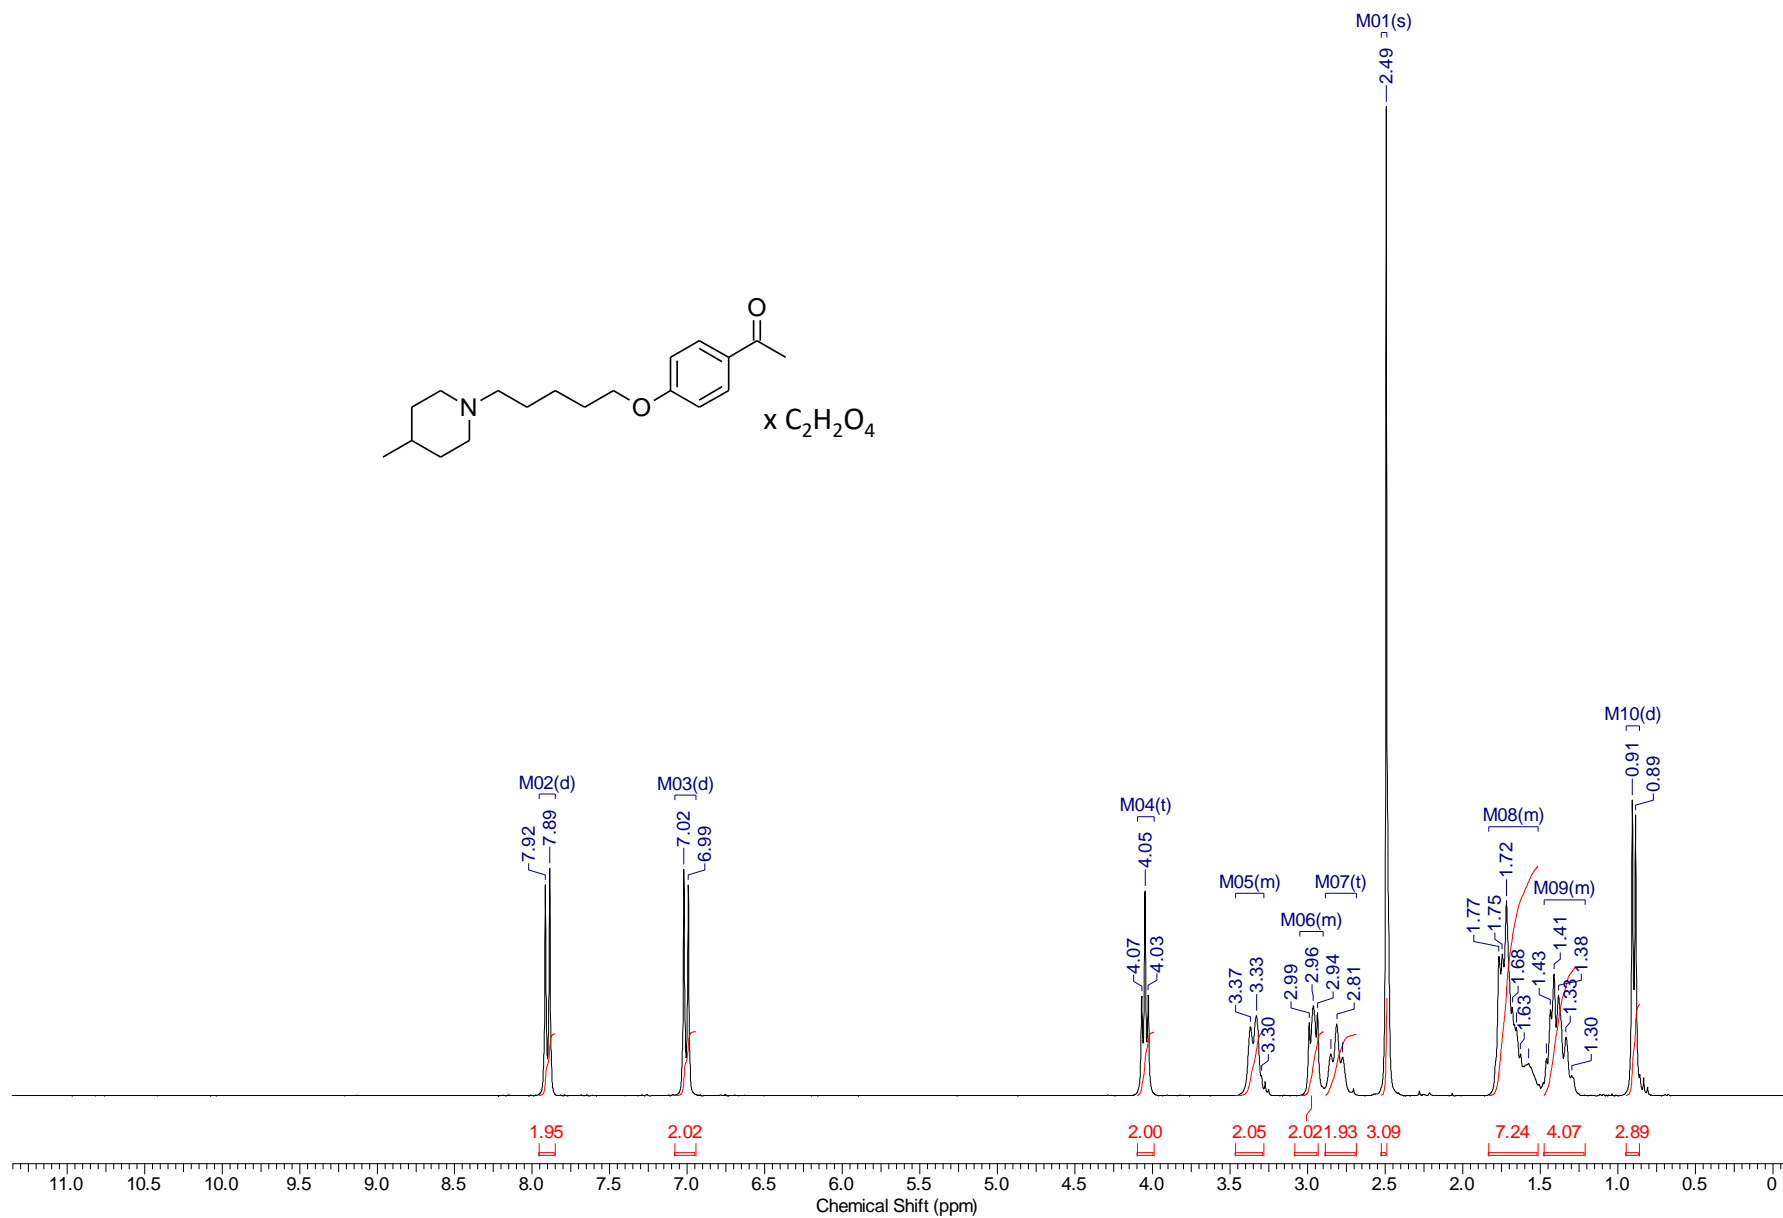

Figure S17.  $^1\text{H}$  NMR spectrum of 1-((4-((5-(4-methylpiperidin-1-yl)pentyl)oxy)phenyl)ethan-1-one) hydrogen oxalate (10)

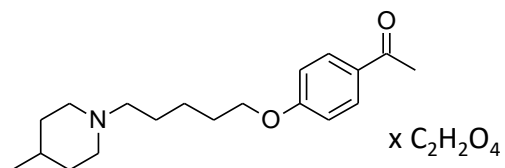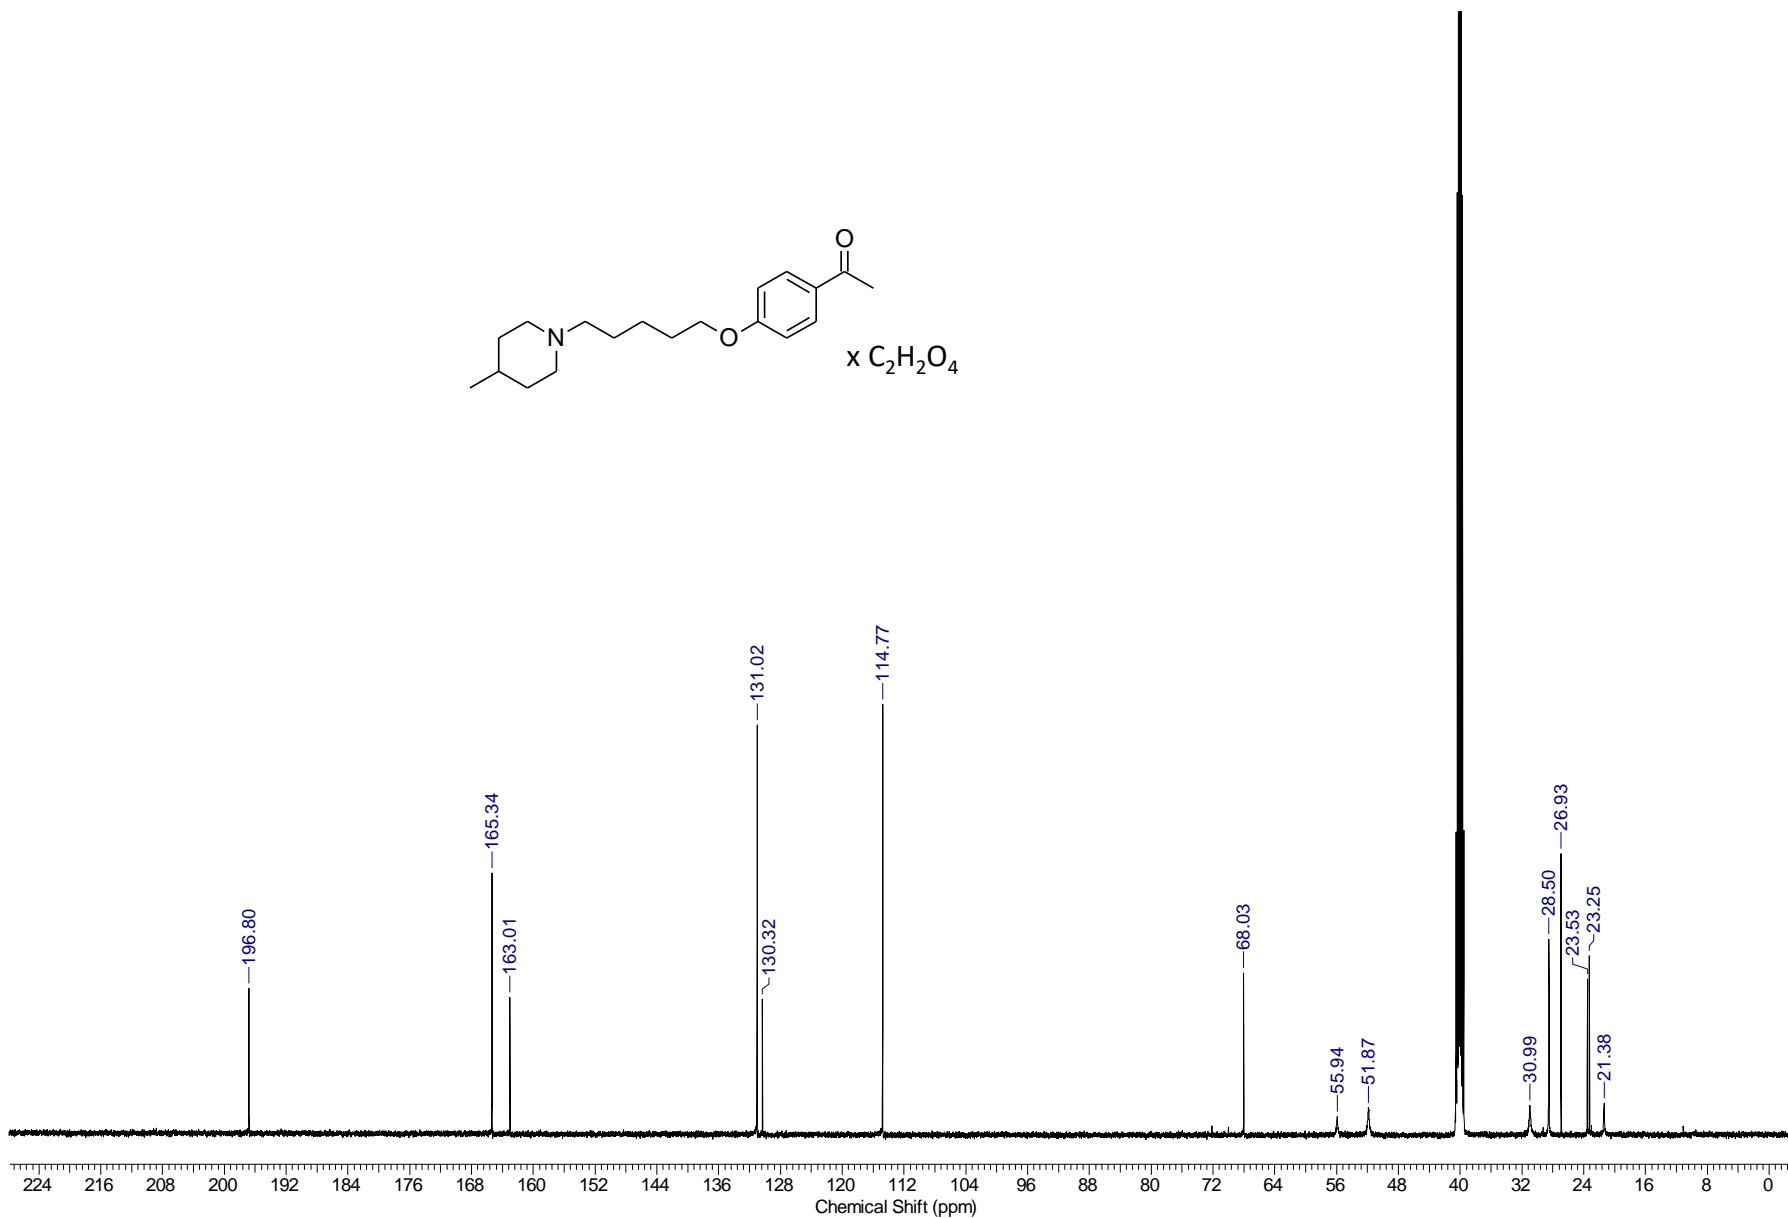

Figure S18. <sup>13</sup>C NMR spectrum of 1-(4-((5-(4-methylpiperidin-1-yl)pentyl)oxy)phenyl)ethan-1-one hydrogen oxalate (**10**)

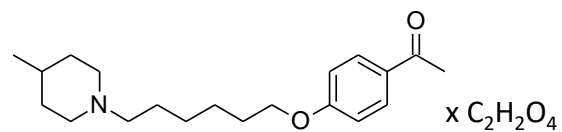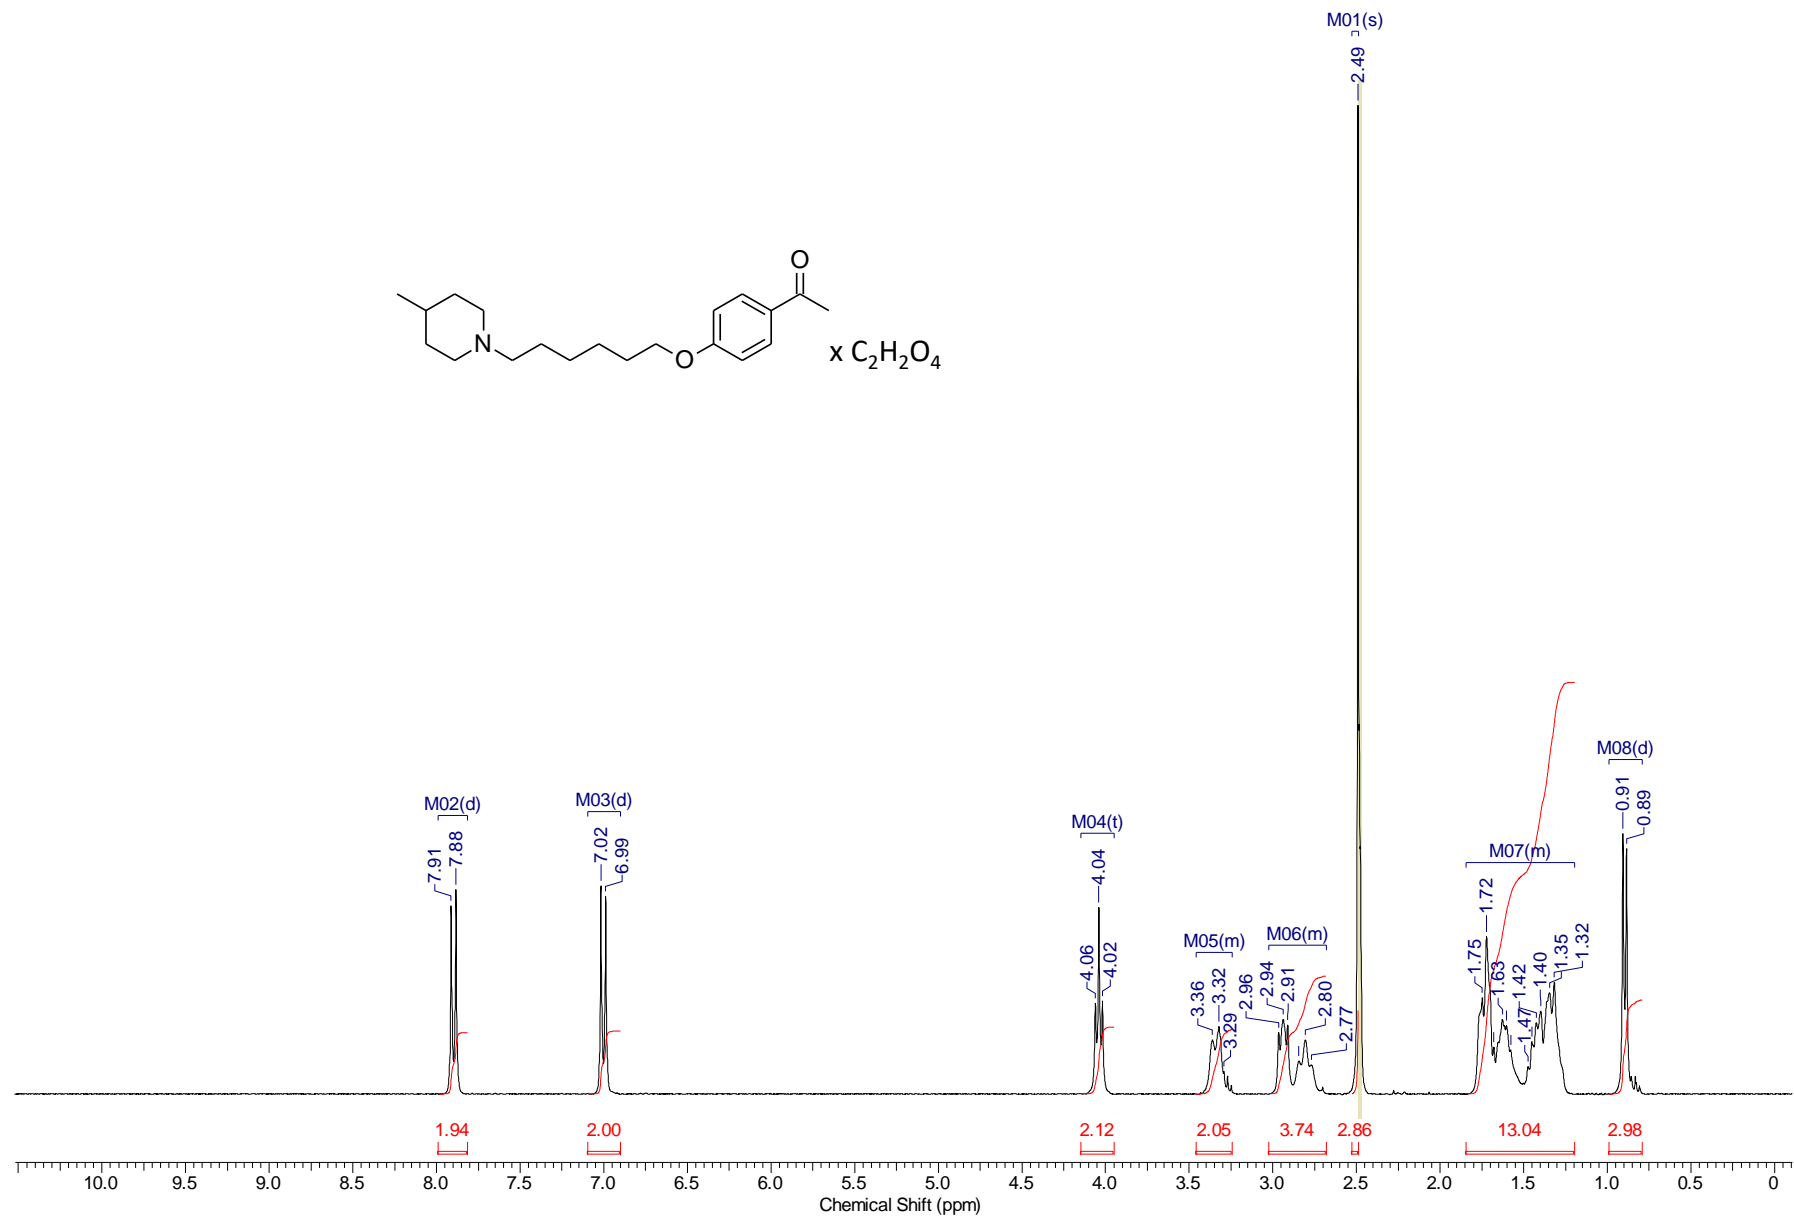

Figure S19. <sup>1</sup>H NMR spectrum of 1-((4-((6-(4-methylpiperidin-1-yl)hexyl)oxy)phenyl)ethan-1-one hydrogen oxalate (11)

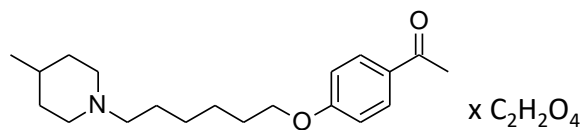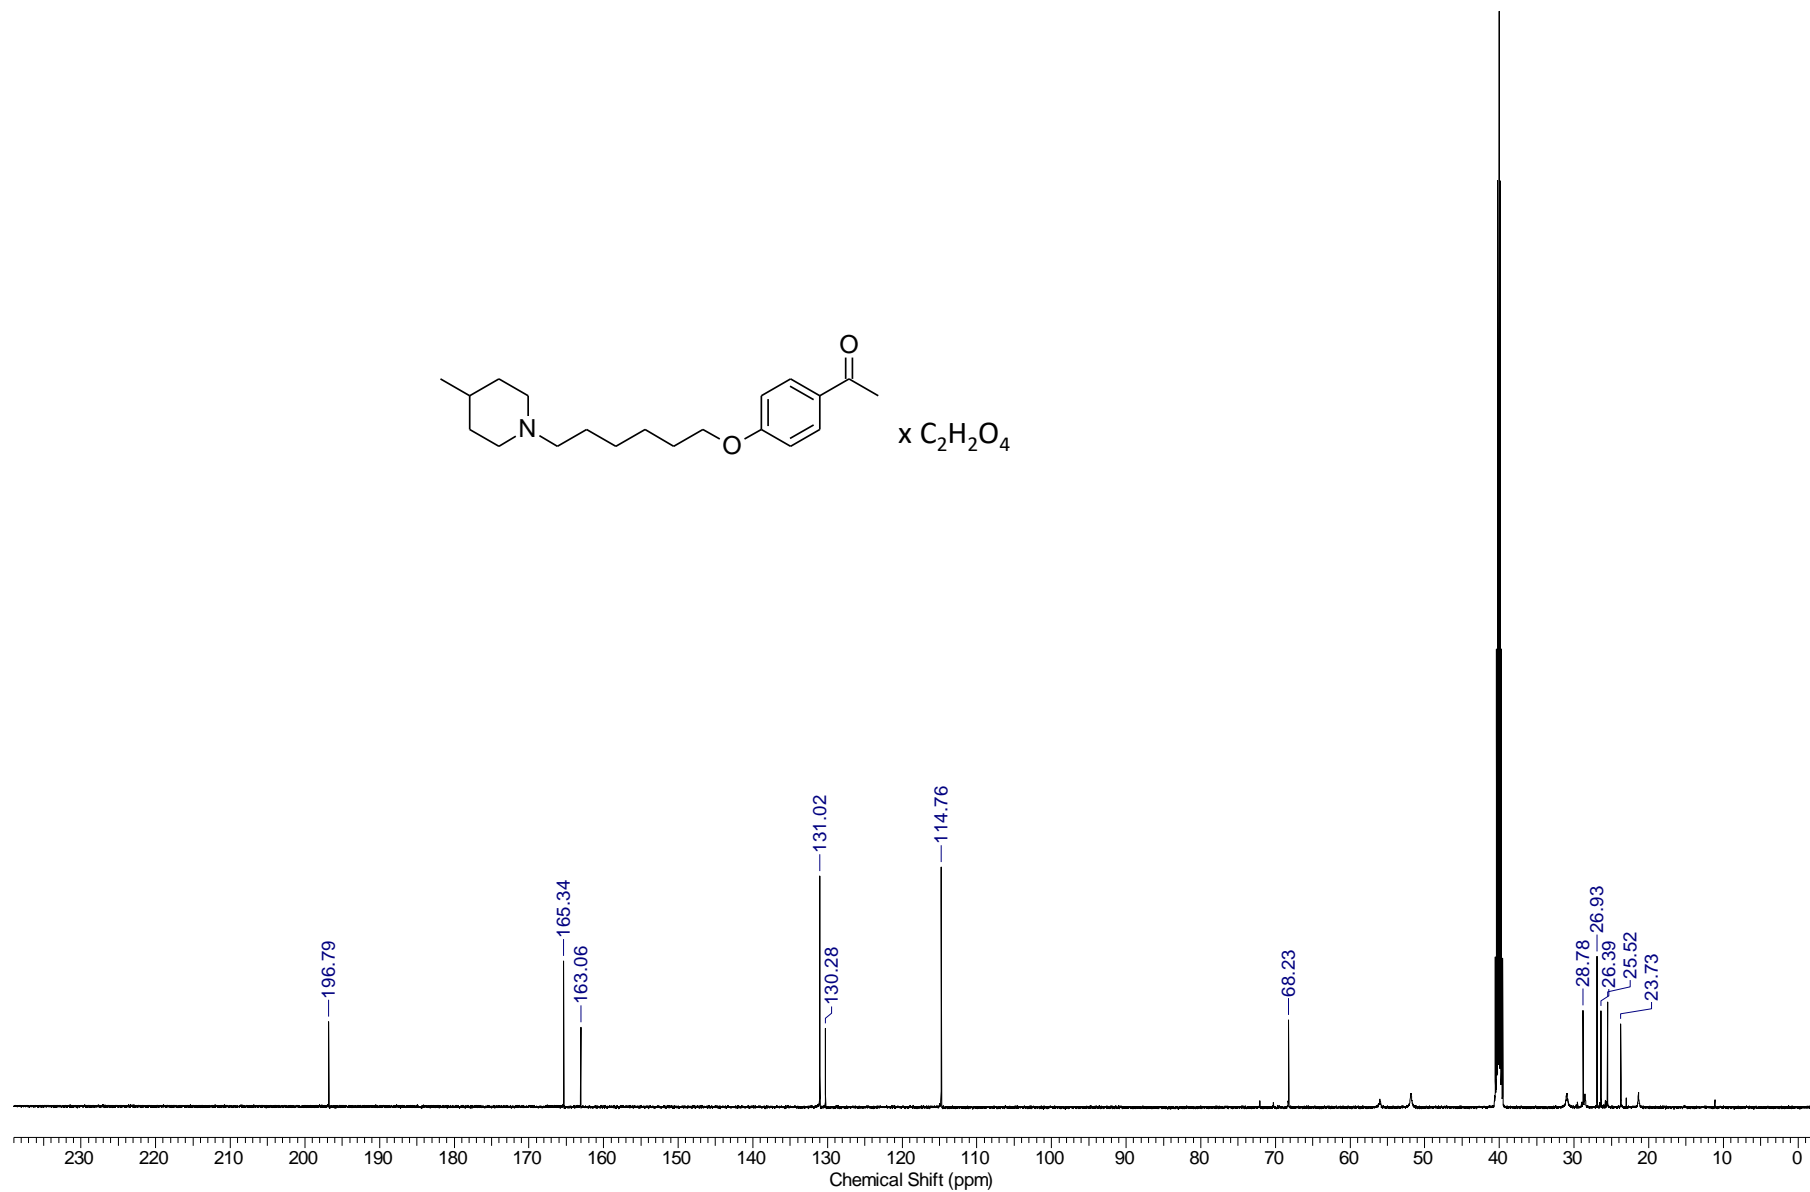

Figure S20.  $^{13}\text{C}$  NMR spectrum of 1-(4-((6-(4-methylpiperidin-1-yl)hexyl)oxy)phenyl)ethan-1-one hydrogen oxalate (11)

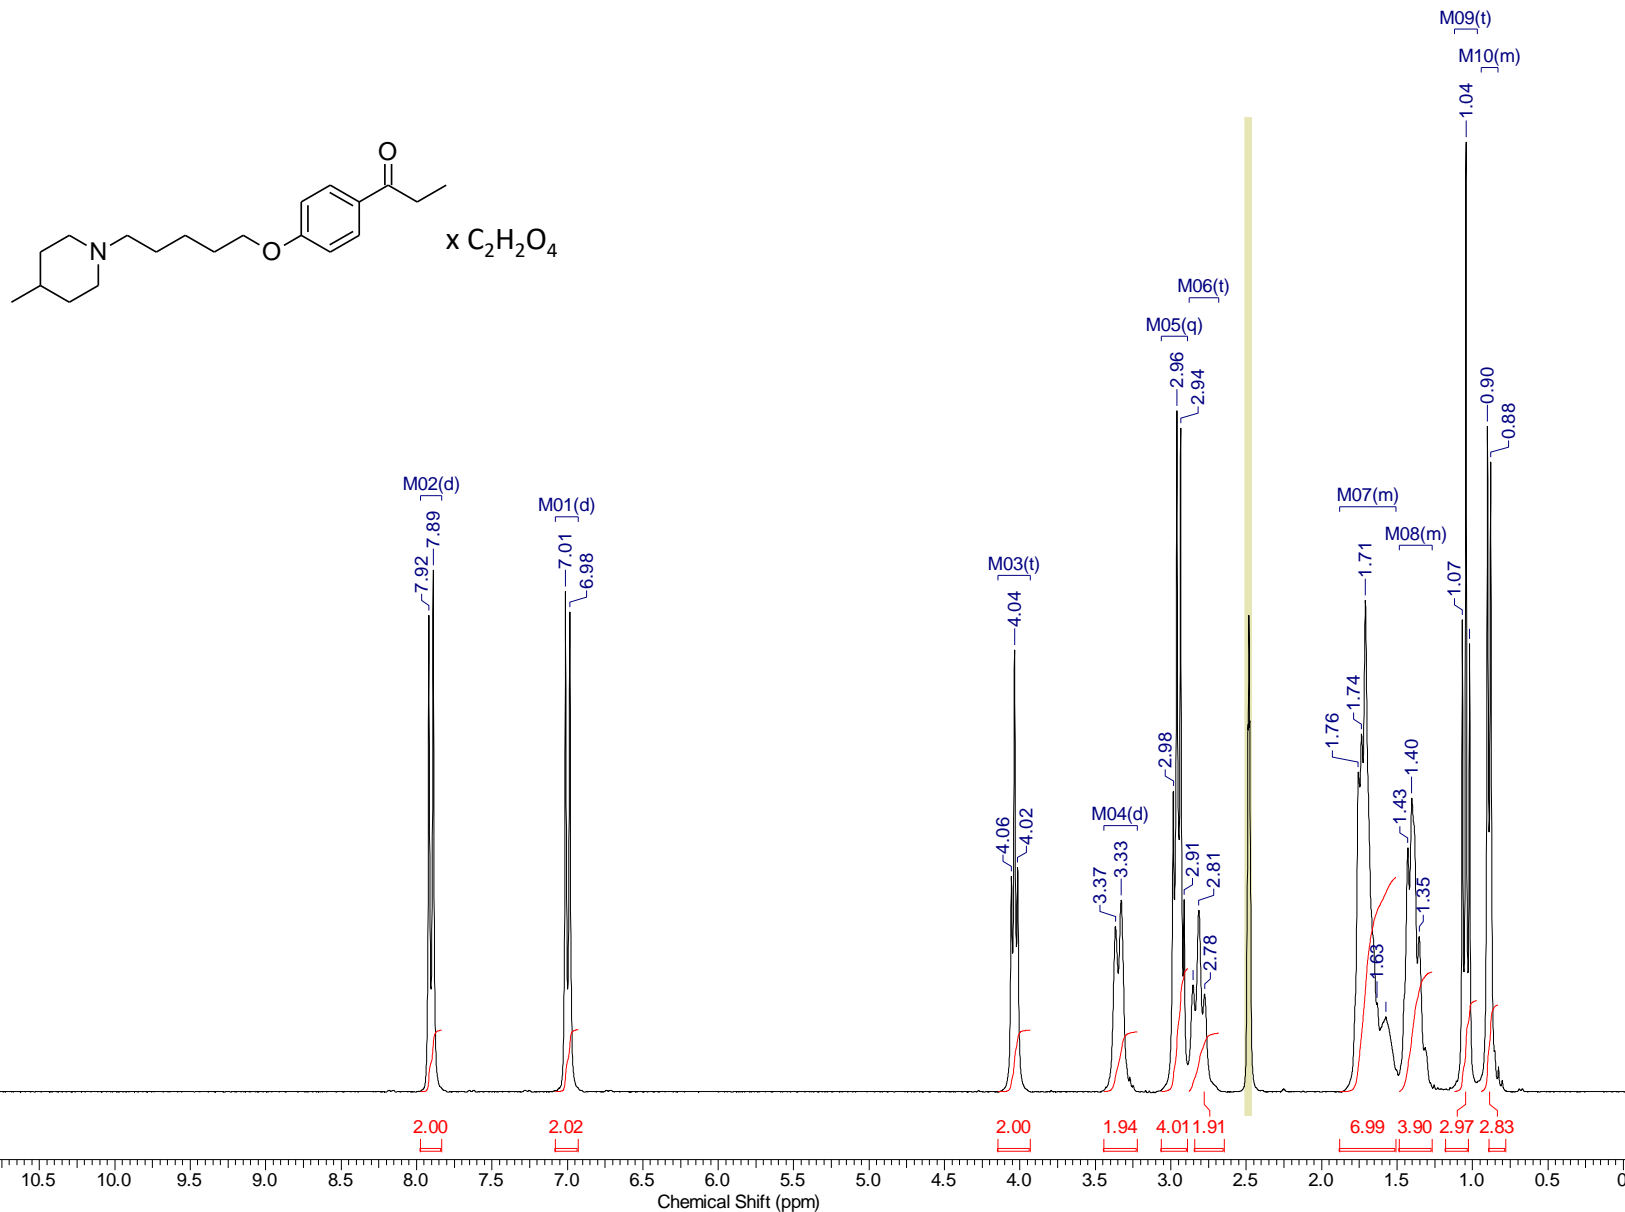

Figure S21.  $^1\text{H}$  NMR spectrum of 1-4-((5-(4-methylpiperidin-1-yl)pentyl)oxy)phenylpropan-1-one hydrogen oxalate (**12**)

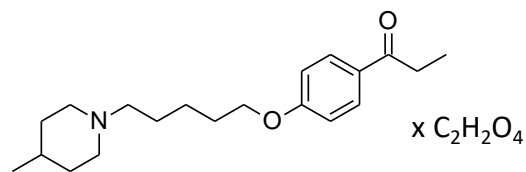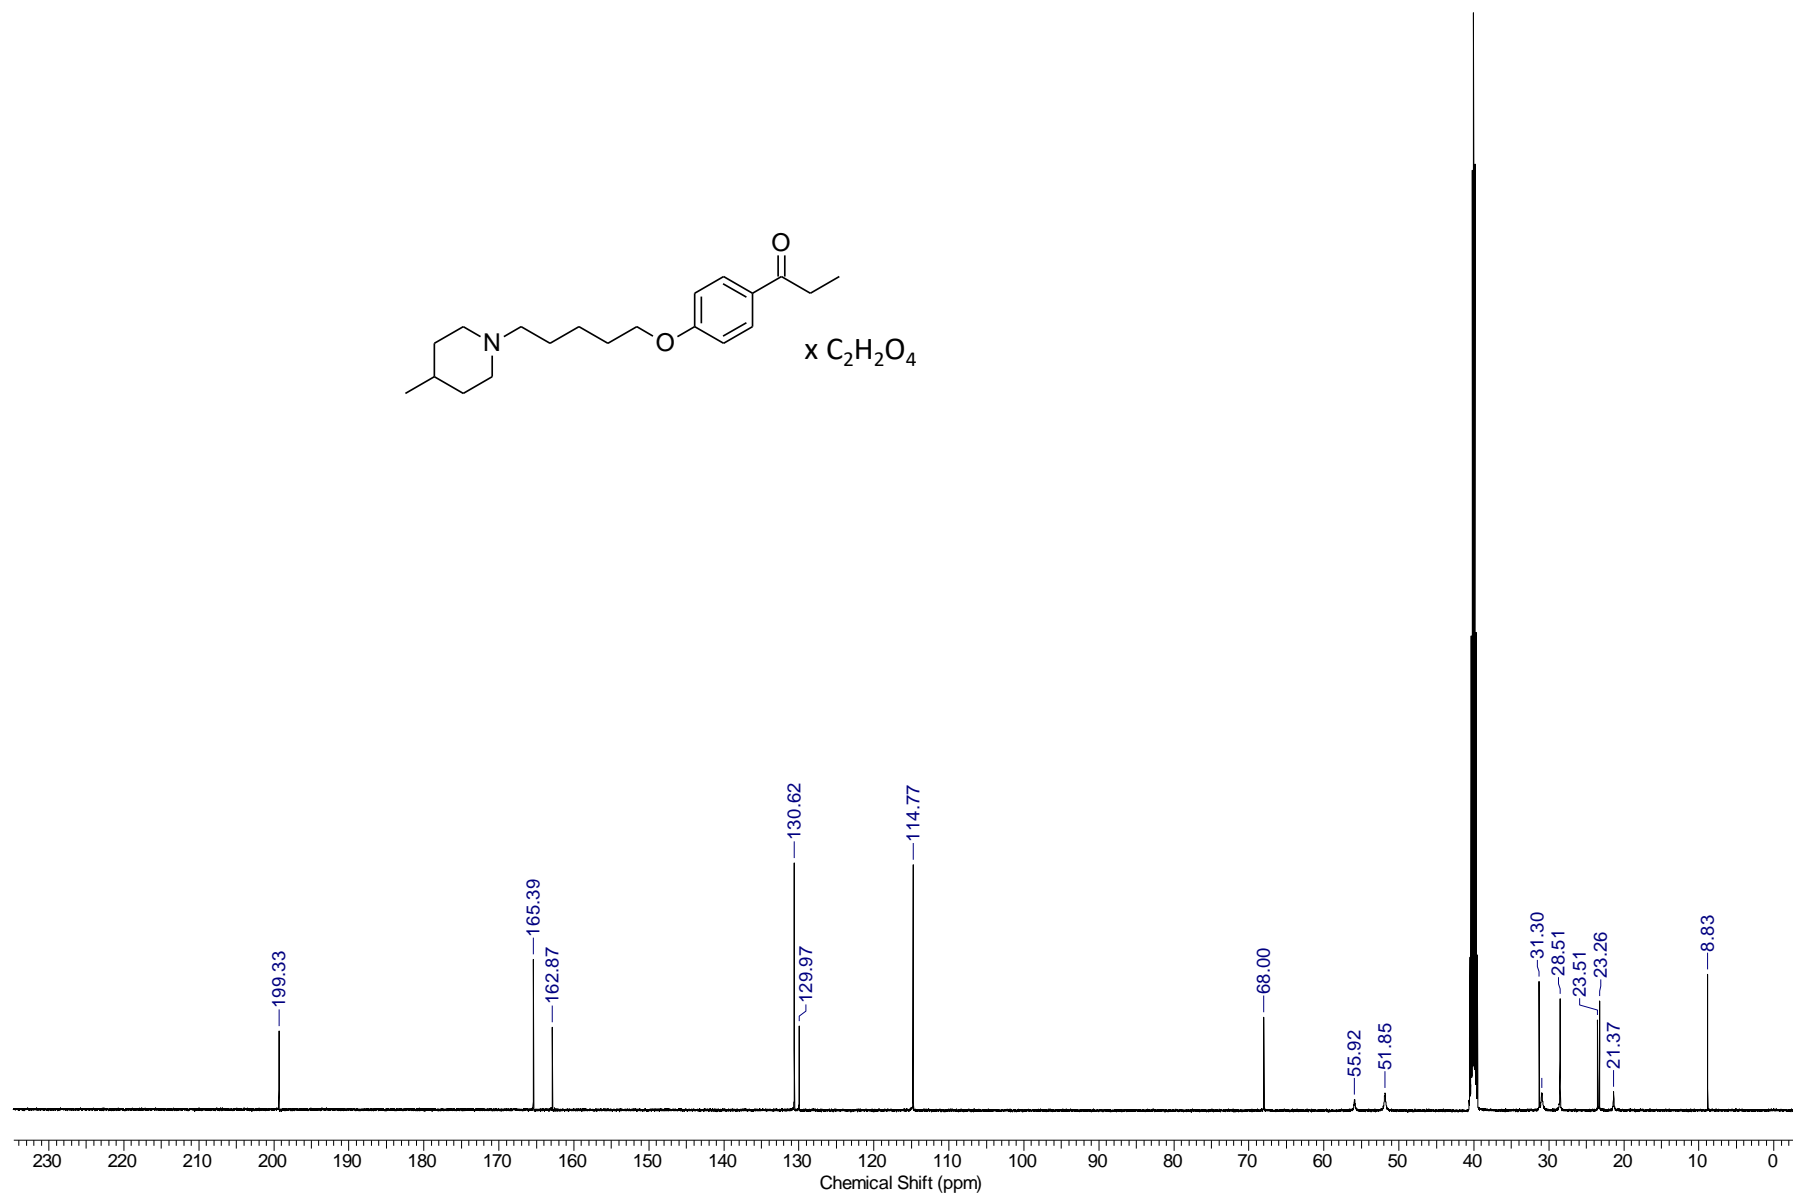

Figure S22. <sup>13</sup>C NMR spectrum of 1-(4-((5-(4-methylpiperidin-1-yl)pentyl)oxy)phenyl)propan-1-one hydrogen oxalate (**12**)

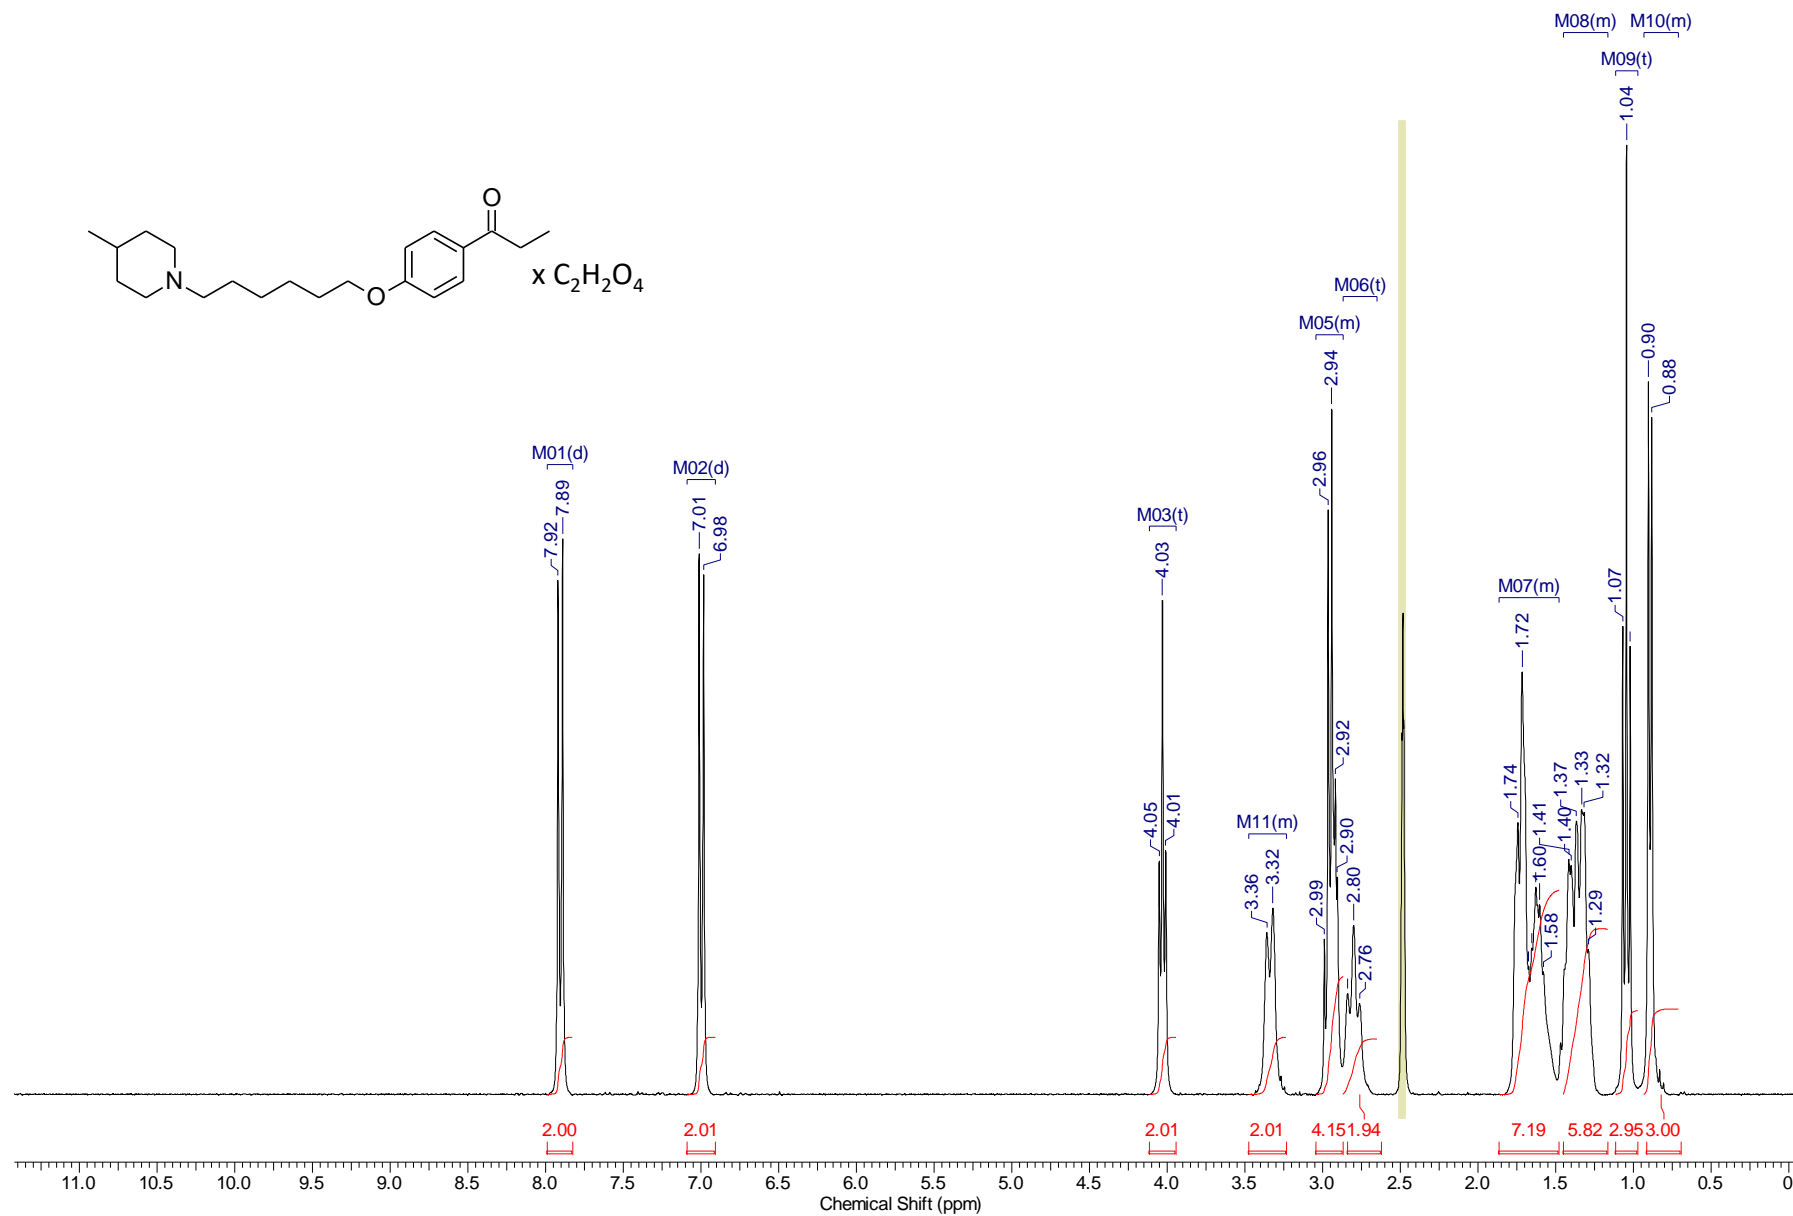

Figure S23.  $^1\text{H}$  NMR spectrum of 1-(4-((6-(4-methylpiperidin-1-yl)hexyl)oxy)phenyl)propan-1-one hydrogen oxalate (**13**)



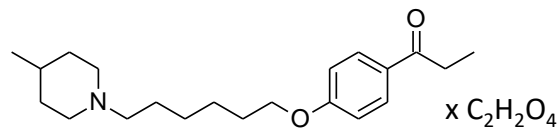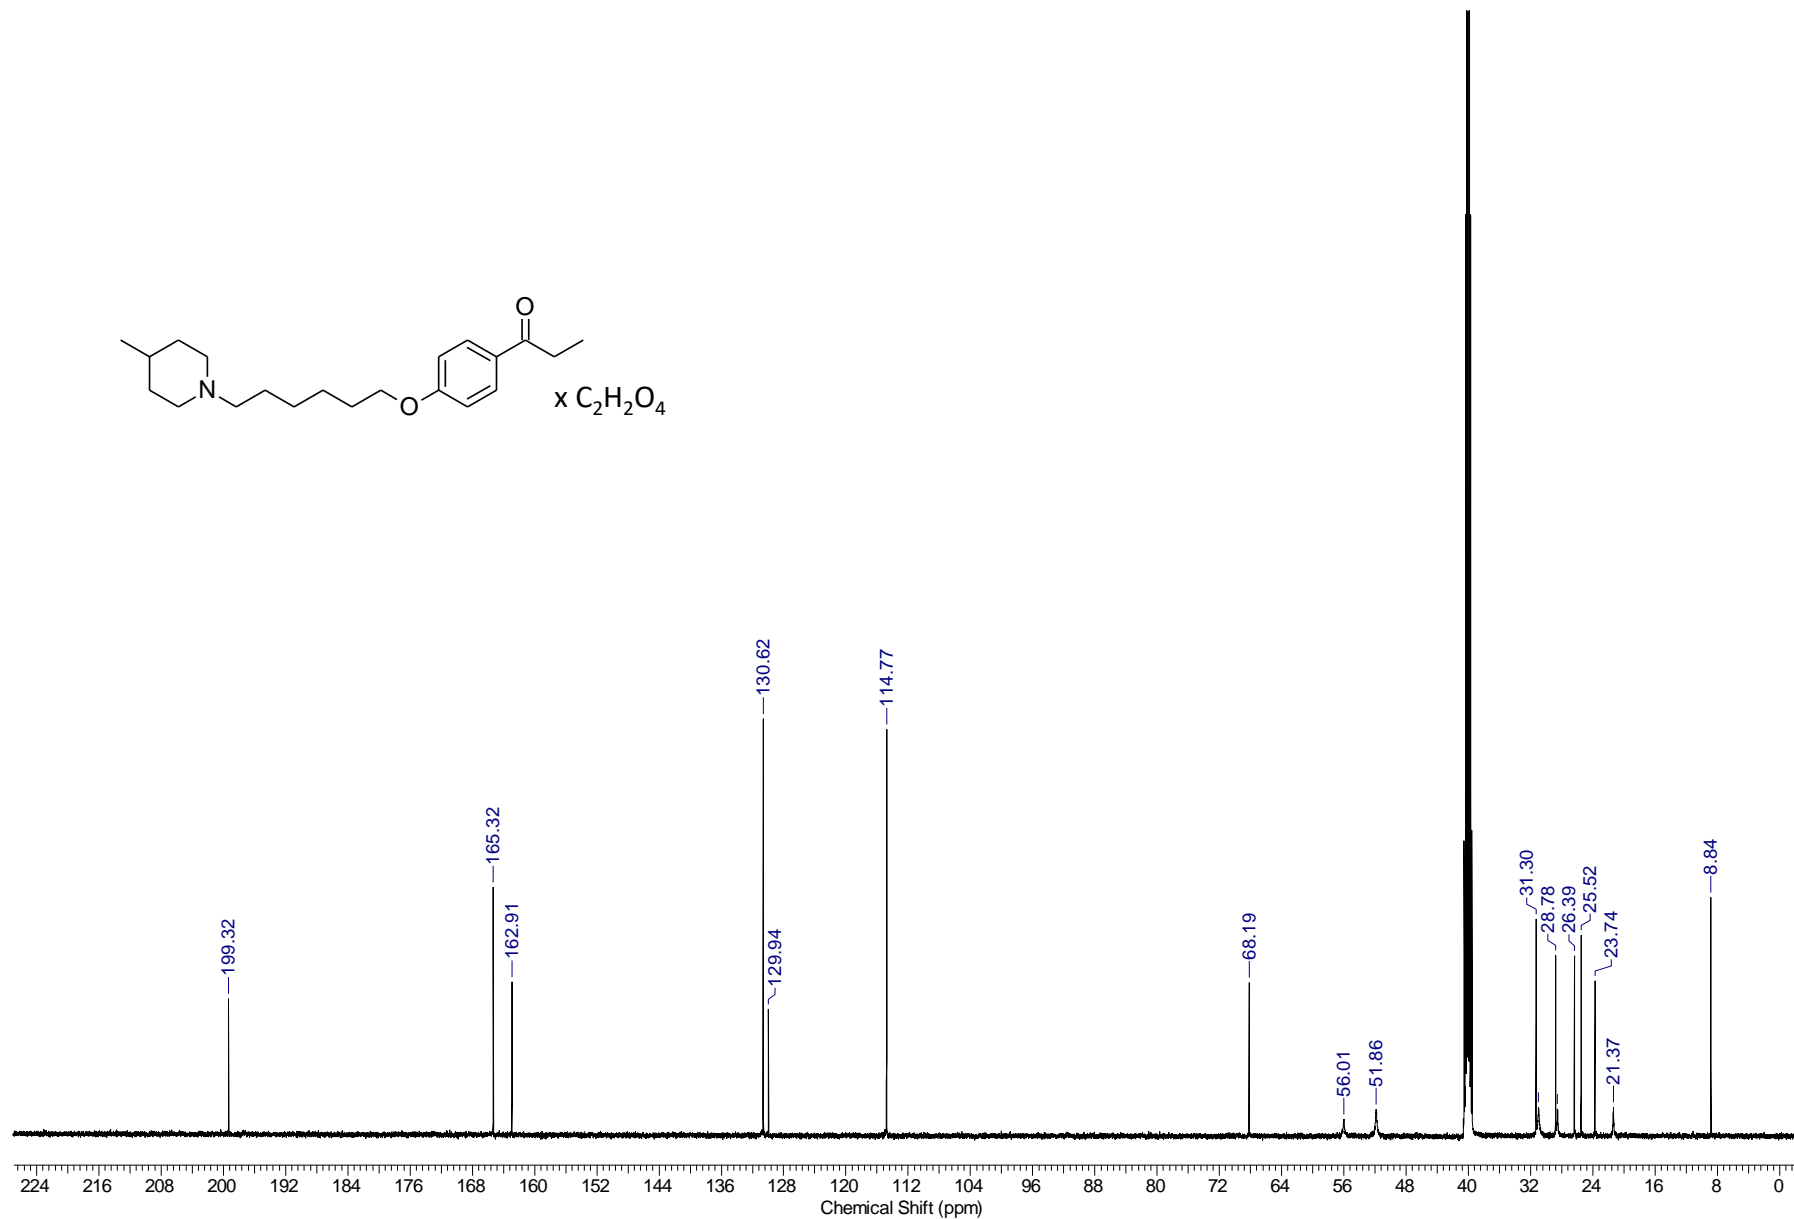

Figure S24.  $^{13}\text{C}$  NMR spectrum of 1-((4-((6-(4-methylpiperidin-1-yl)hexyl)oxy)phenyl)propan-1-one) hydrogen oxalate (13)

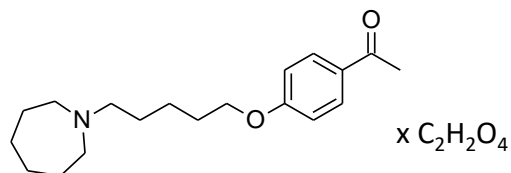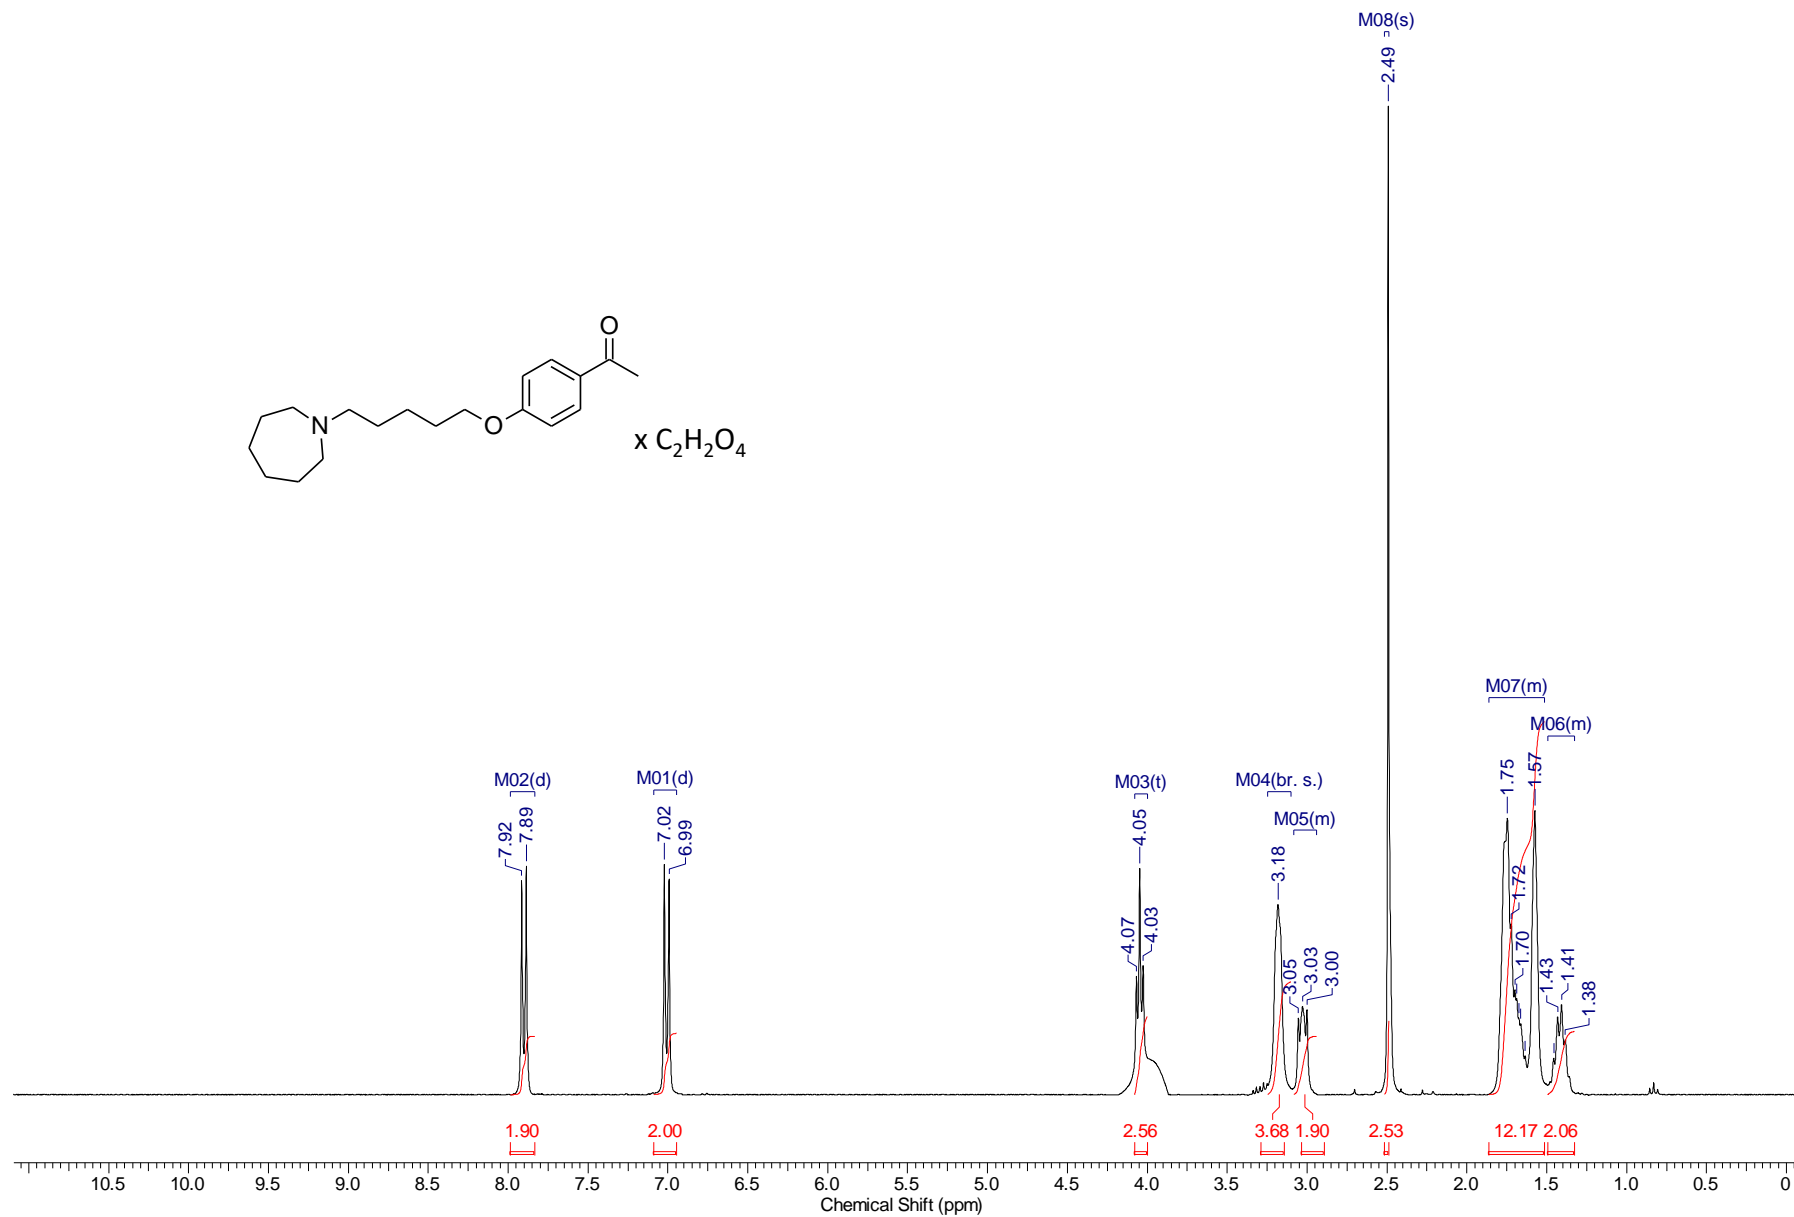

Figure S25. <sup>1</sup>H NMR spectrum of 1-(4-((5-(azepan-1-yl)pentyl)oxy)phenyl)ethan-1-one hydrogen oxalate (**14**)

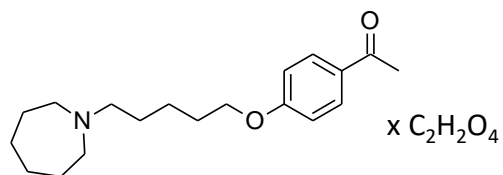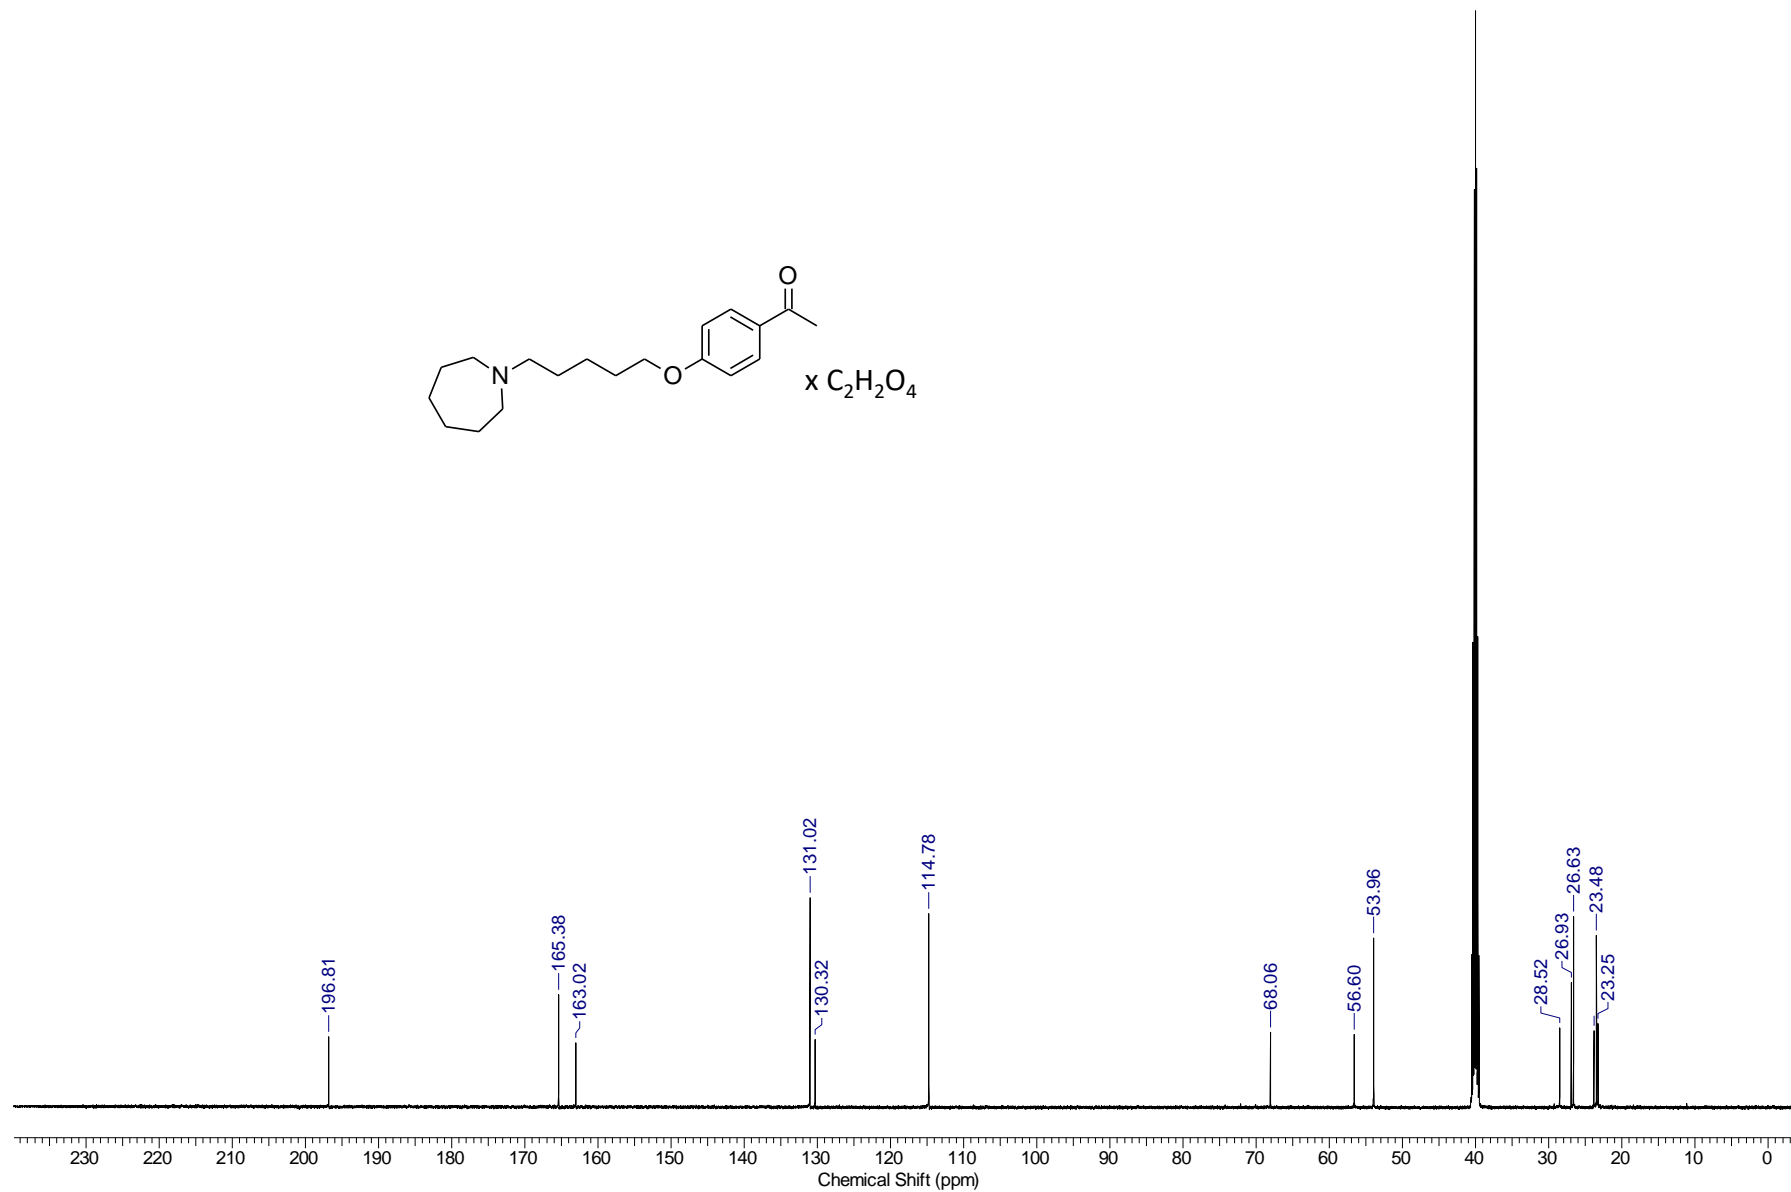

Figure S26.  $^{13}\text{C}$  NMR spectrum of 1-(4-((5-(azepan-1-yl)pentyl)oxy)phenyl)ethan-1-one hydrogen oxalate (**14**)

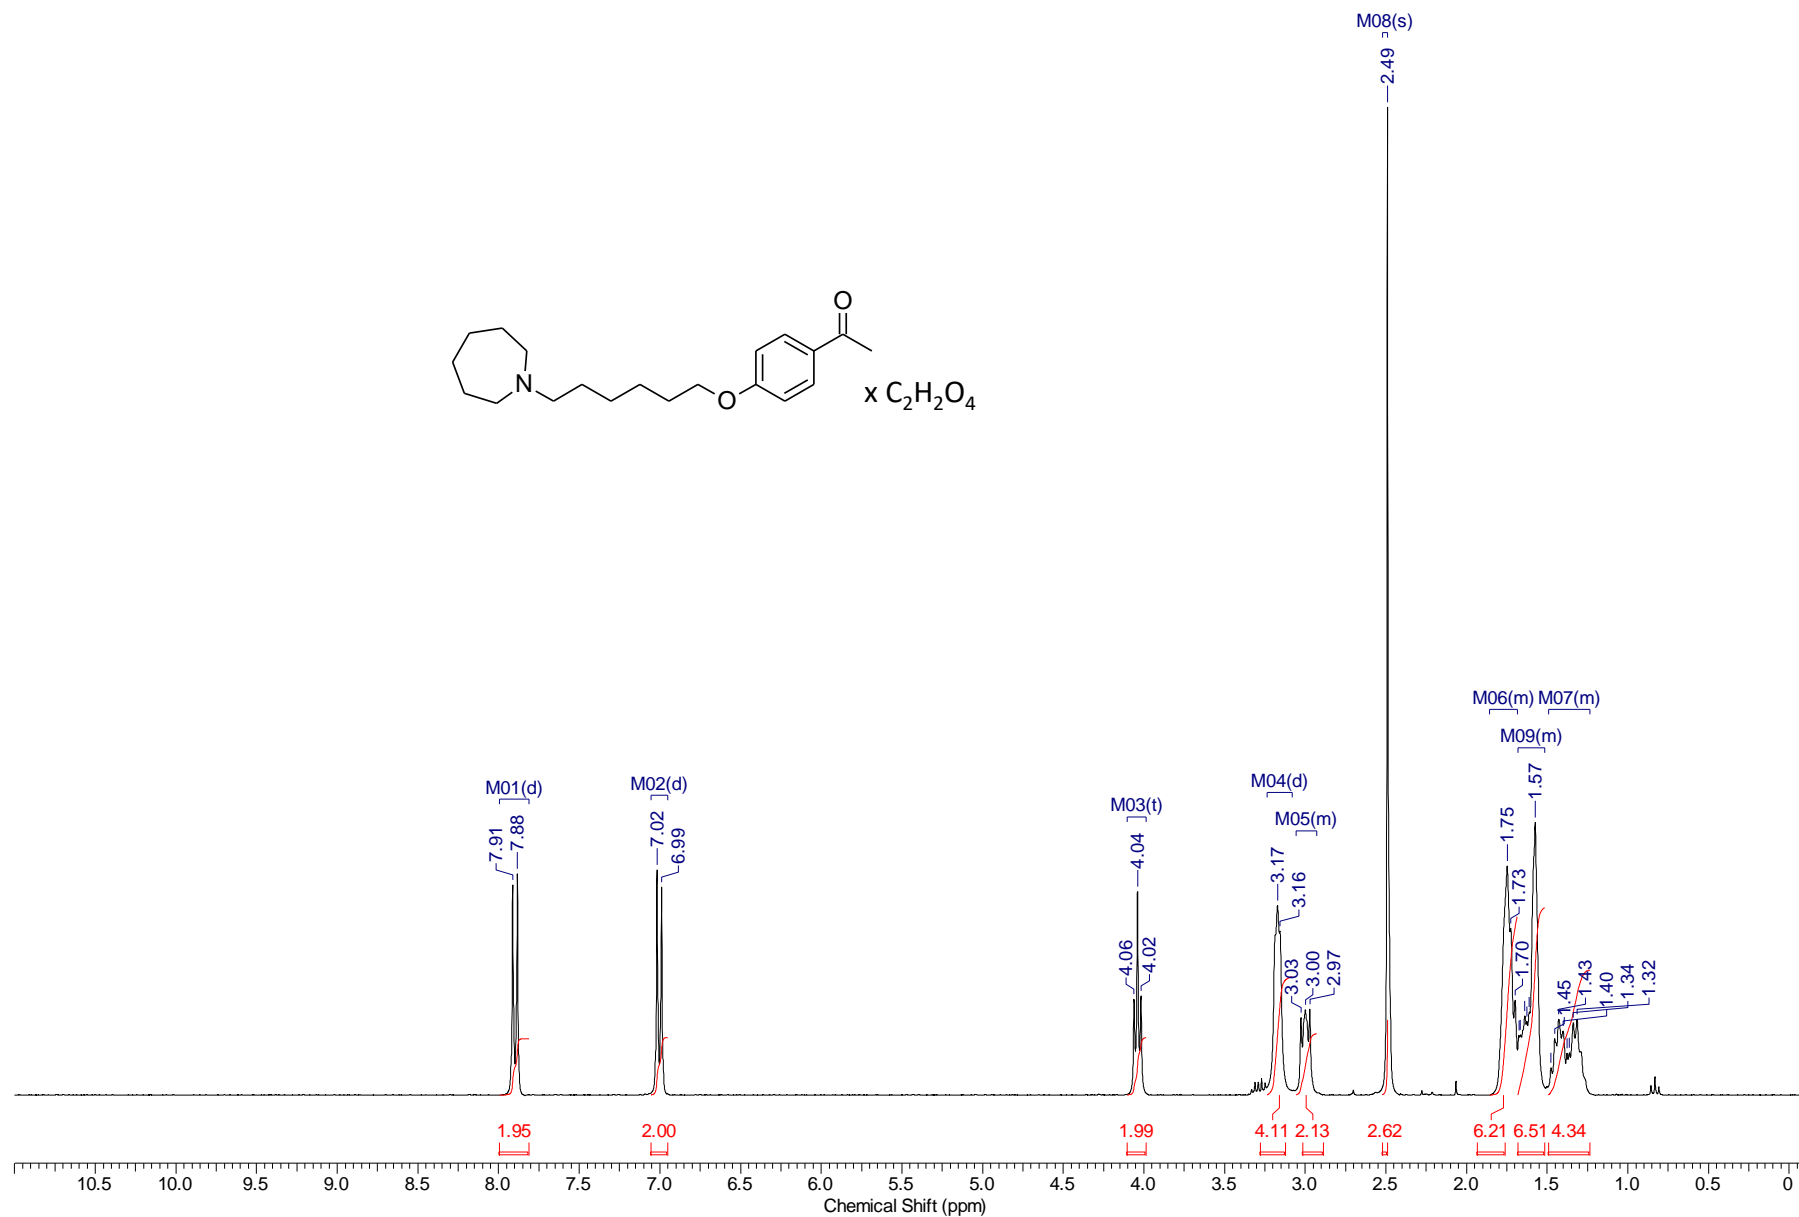

Figure S27.  $^1\text{H}$  NMR spectrum of 1-(4-((5-(azepan-1-yl)hexyl)oxy)phenyl)ethan-1-one hydrogen oxalate (**15**)

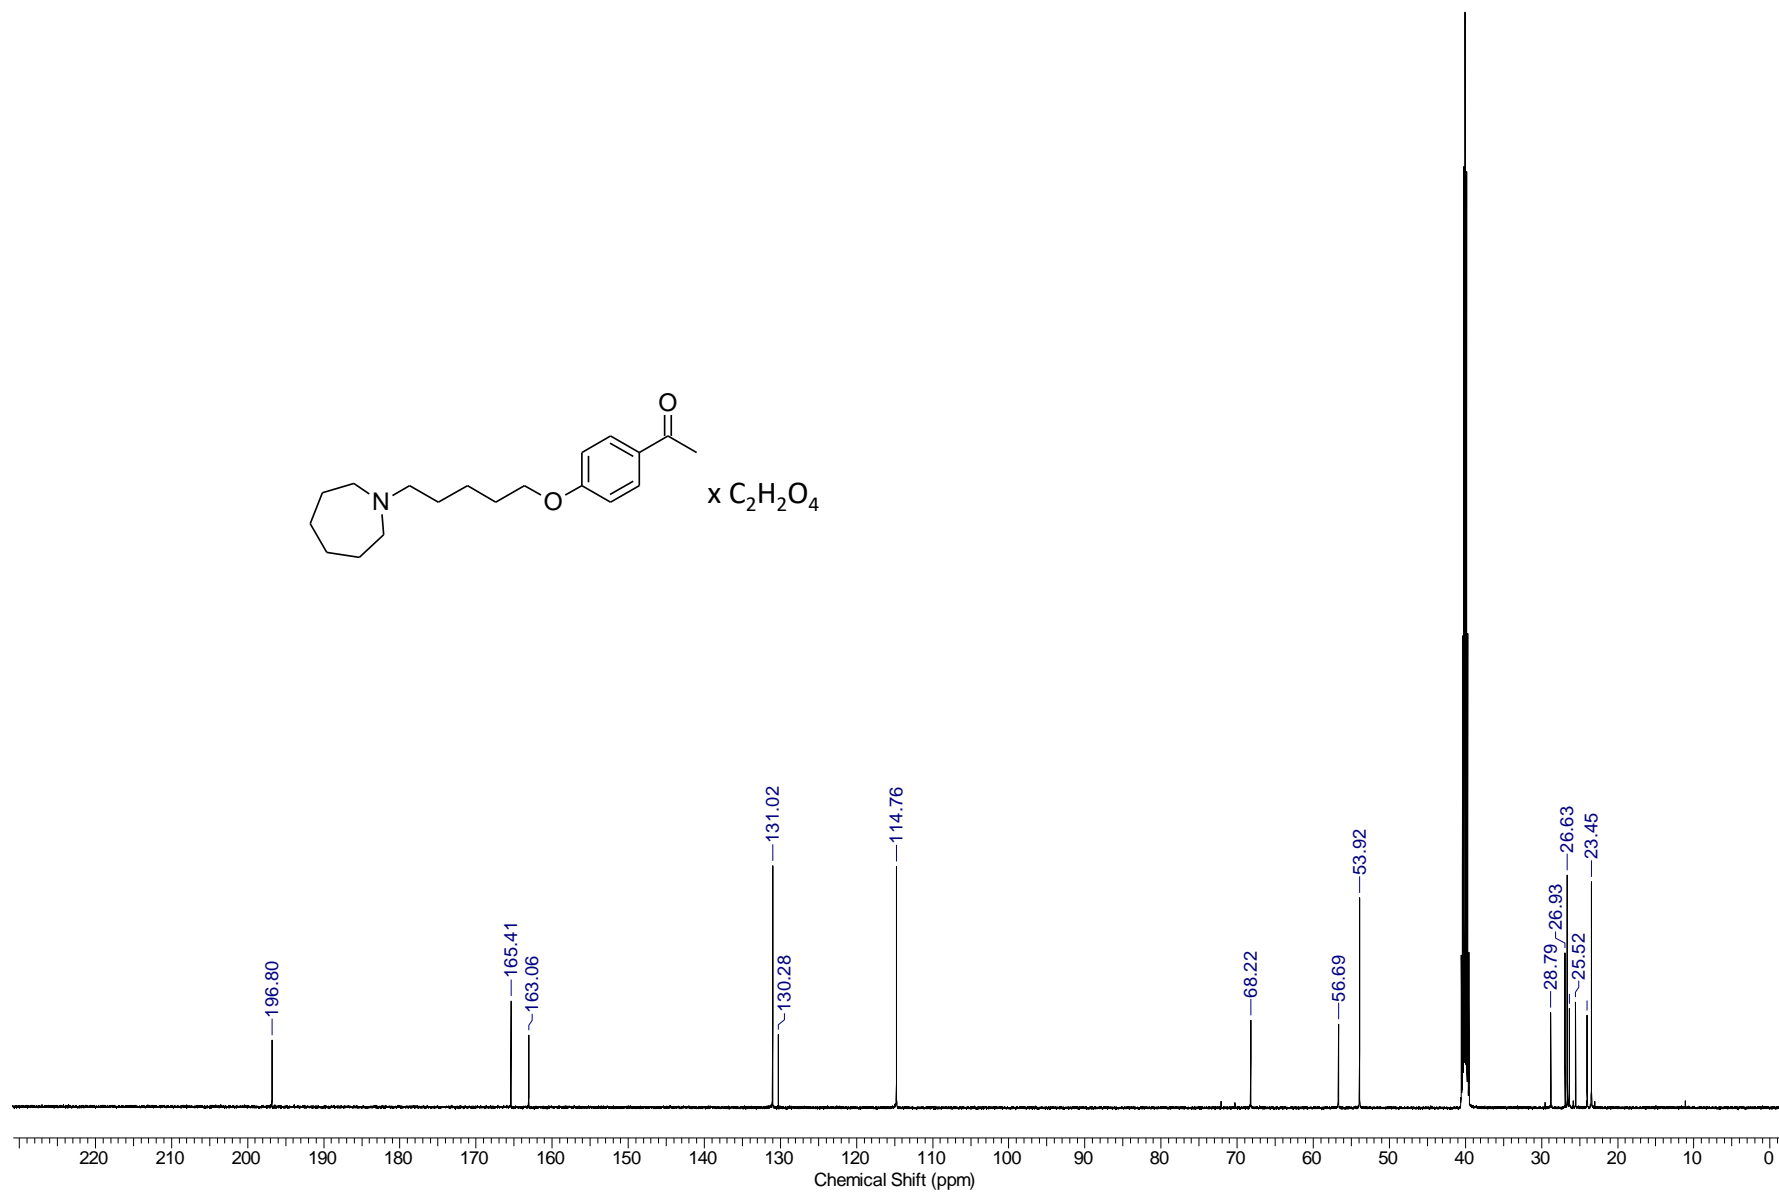

Figure S28.  $^{13}\text{C}$  NMR spectrum of 1-(4-((5-(azepan-1-yl)hexyl)oxy)phenyl)ethan-1-one hydrogen oxalate (15)

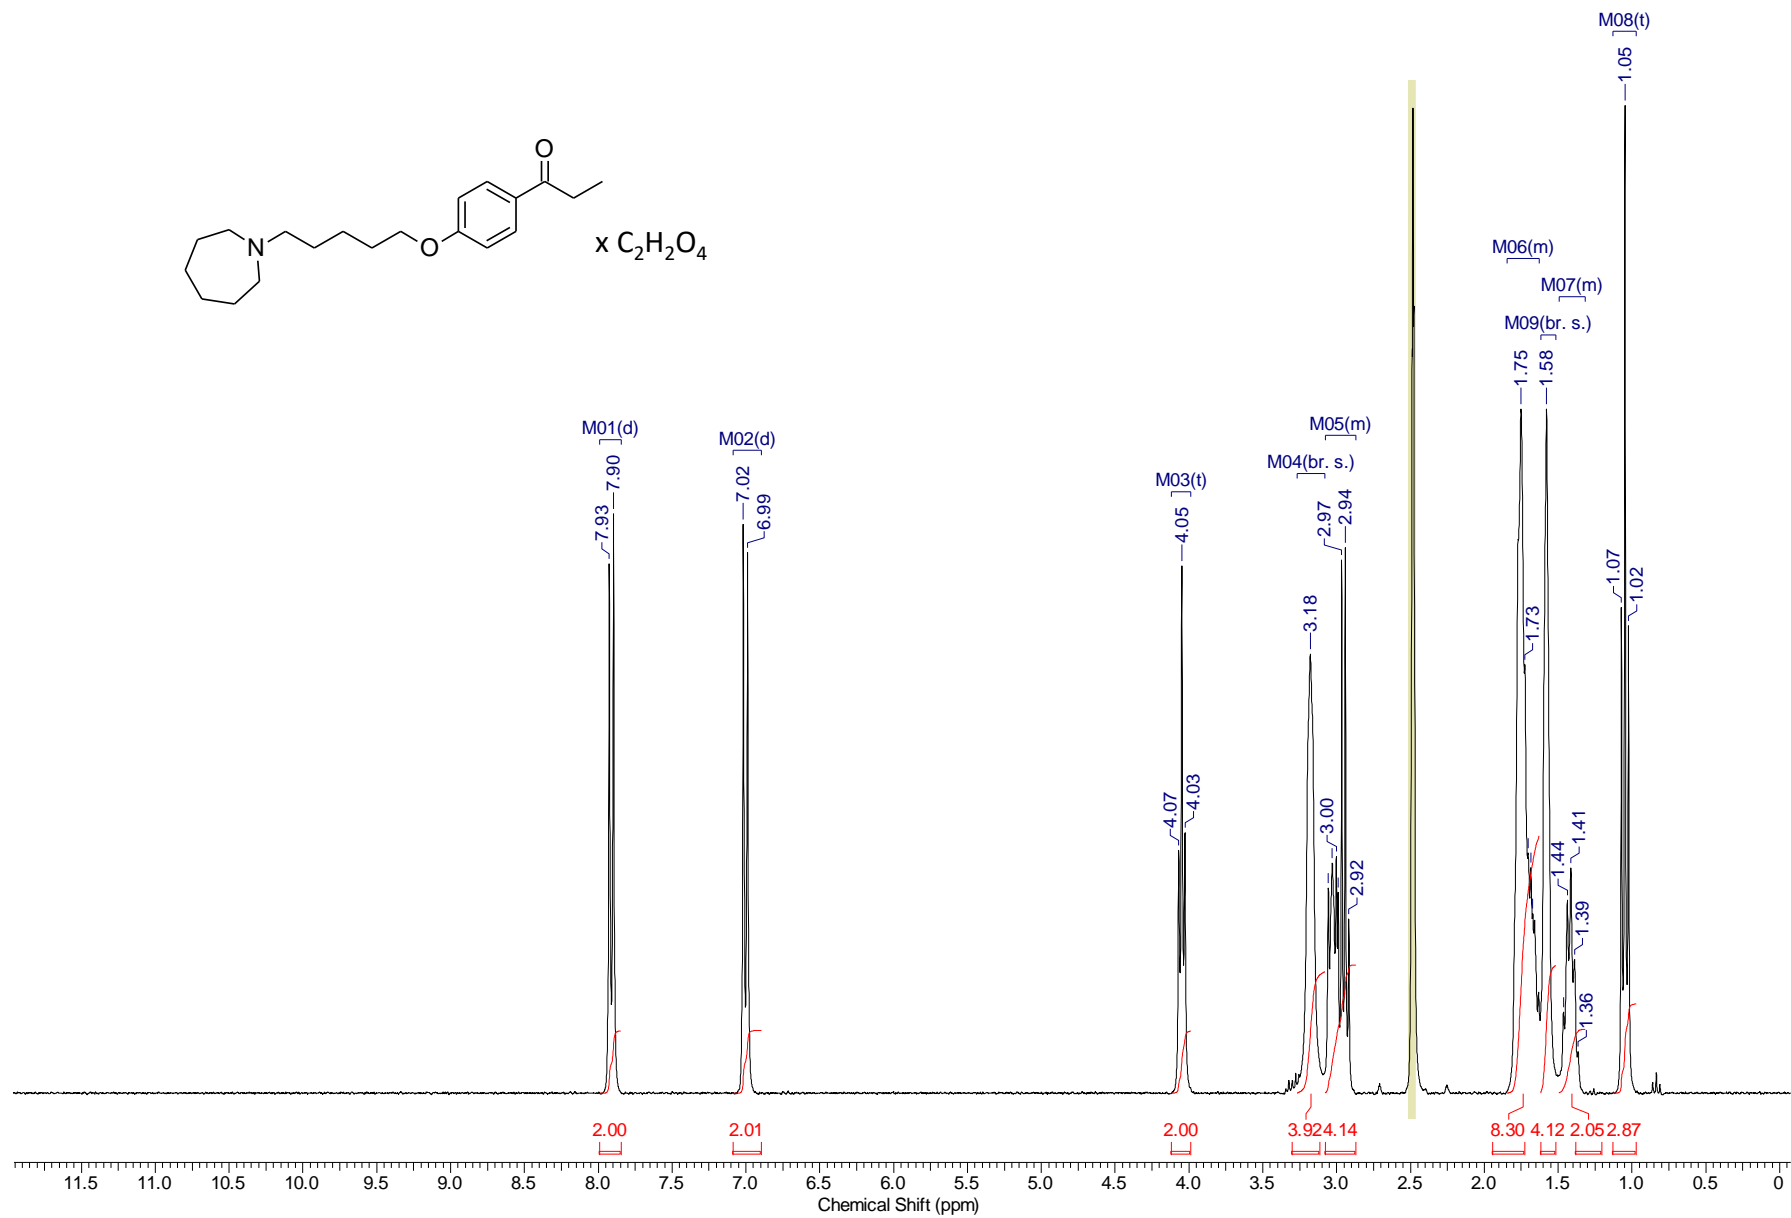

Figure S29.  $^1\text{H}$  NMR spectrum of 1-(4-((5-(azepan-1-yl)pentyl)oxy)phenyl)propan-1-one hydrogen oxalate (**16**)

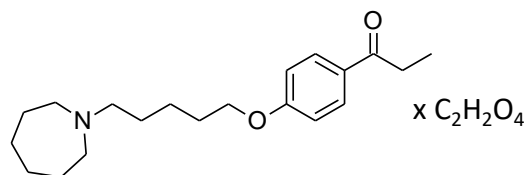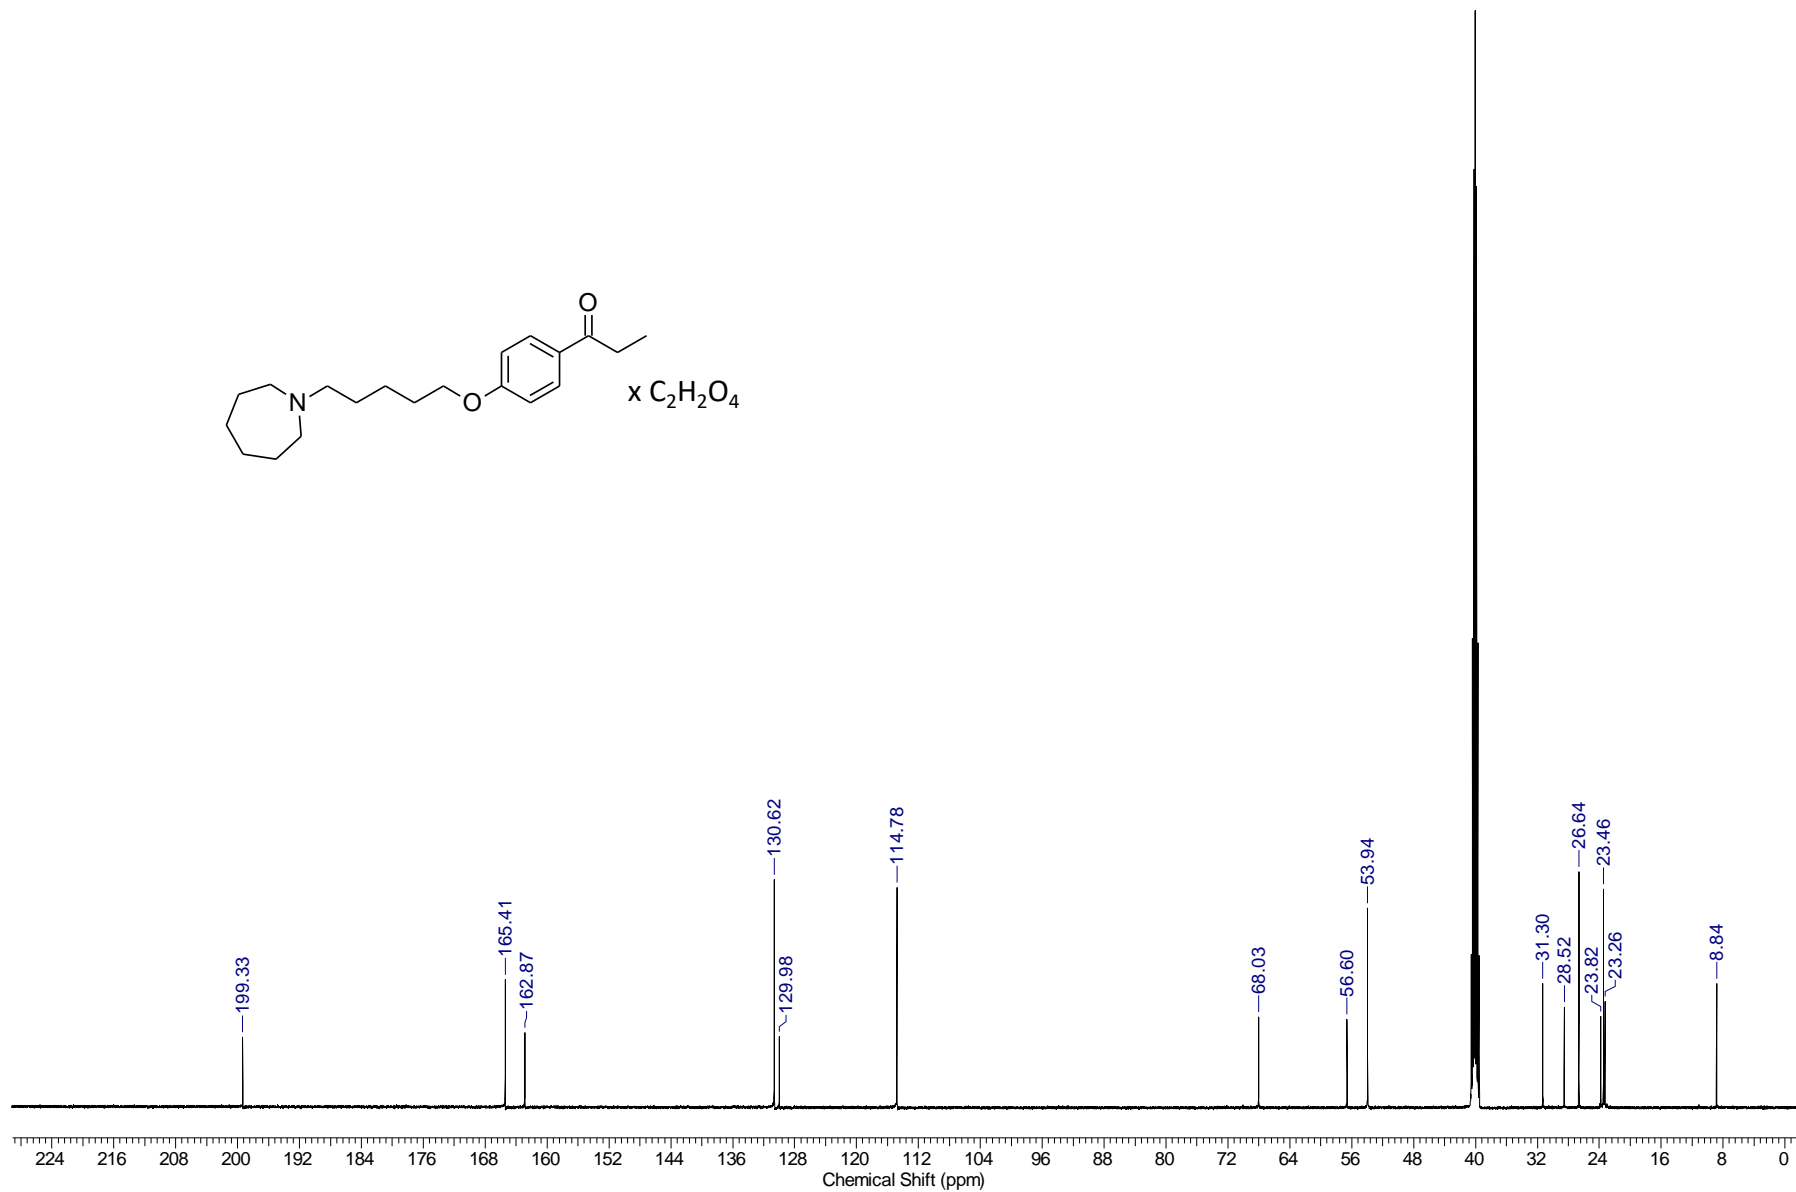

Figure S30. <sup>13</sup>C NMR spectrum of 1-(4-((5-(azepan-1-yl)pentyl)oxy)phenyl)propan-1-one hydrogen oxalate (**16**)

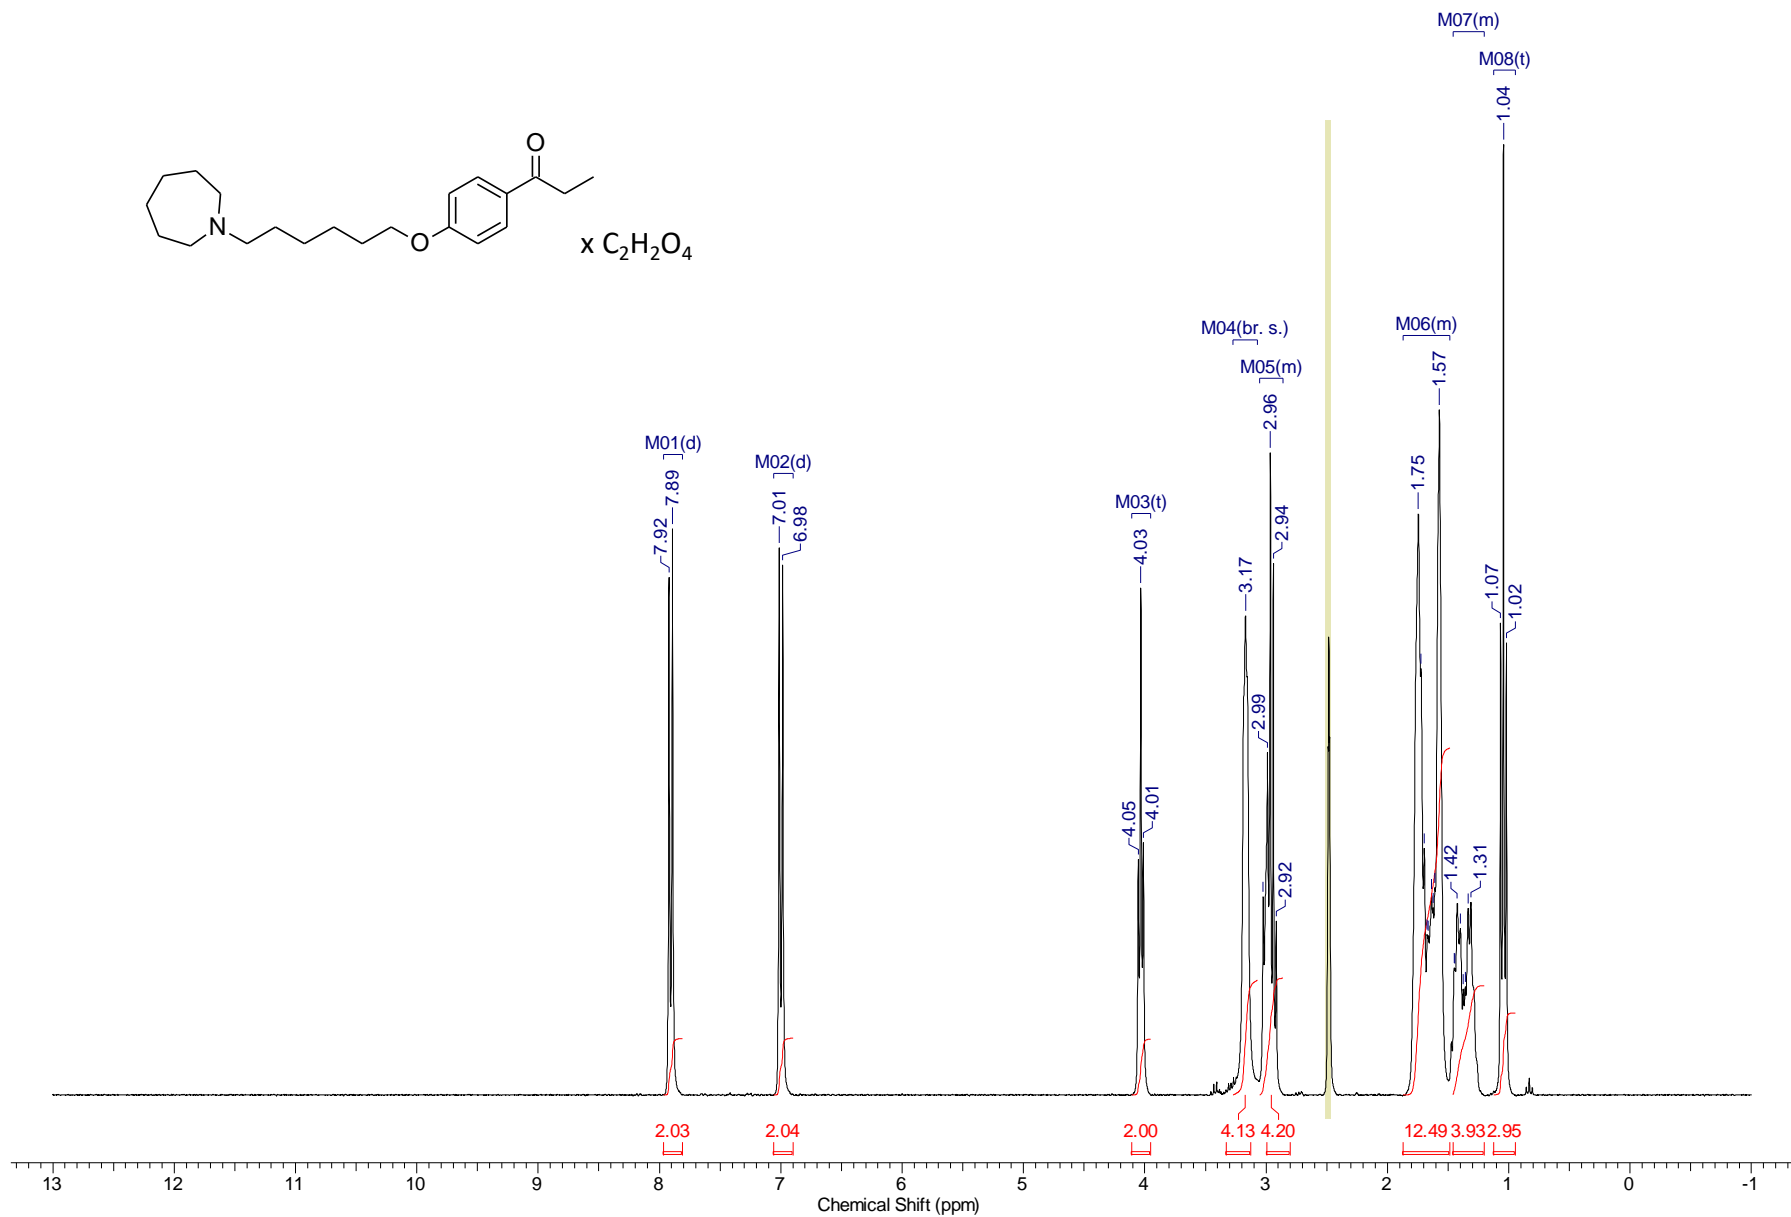

Figure S31.  $^1\text{H}$  NMR spectrum of 1-(4-((6-(azepan-1-yl)hexyl)oxy)phenyl)propan-1-one hydrogen oxalate (**17**)



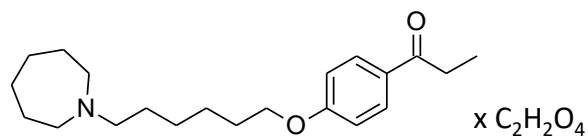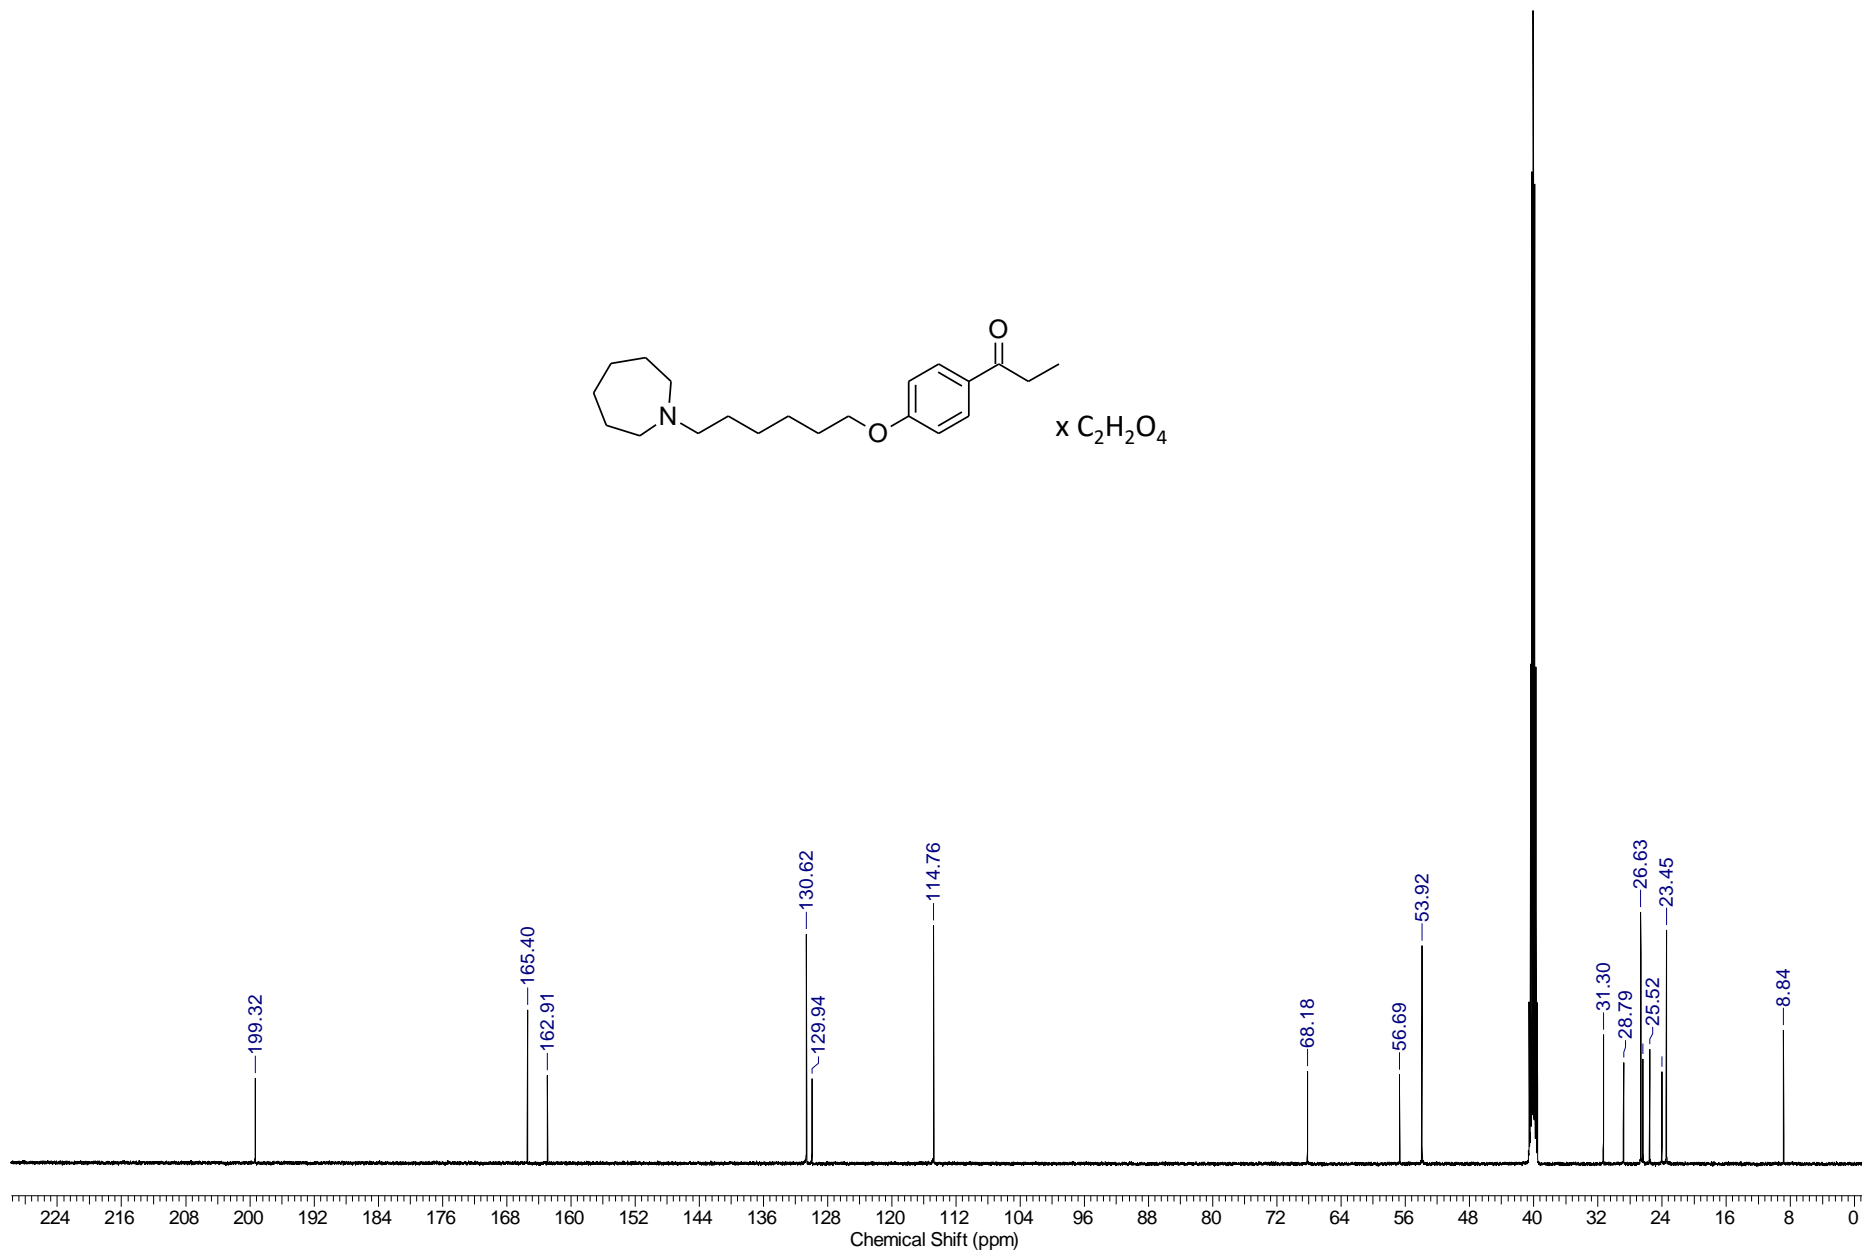

Figure S32. <sup>13</sup>C NMR spectrum of 1-(4-((6-(azepan-1-yl)hexyl)oxy)phenyl)propan-1-one hydrogen oxalate (17)
